# Supplementary material for: Microtubule-Dependent Modulation of Adhesion Complex Composition
Source: PLoS One. 2014 Dec 19;9(12):e115213. doi: 10.1371/journal.pone.0115213 (PMC4272306; doi:10.1371/journal.pone.0115213)
Supplement: S1 Table — MS data of FN DMSO, FN Noc, PDL DMSO, and PDL Noc. (XLSX) [file pone.0115213.s003.xlsx]

## Sheet: MS data
				Unweighted spectral counts								Unweighted spectral counts normalised to identified spectra								Molecular weight normalised spectral counts
#	Identified Proteins (1177)	Accession Number	Molecular Weight	FN, DMSO, Biological replicate 1	FN, DMSO, Biological replicate 2	FN, Noc, Biological replicate 1	FN, Noc, Biological replicate 2	PDL, DMSO, Biological replicate 1	PDL, DMSO, Biological replicate 2	PDL, Noc, Biological replicate 1	PDL, Noc, Biological replicate 2	FN, DMSO, Biological replicate 1	FN, DMSO, Biological replicate 2	FN, Noc, Biological replicate 1	FN, Noc, Biological replicate 2	PDL, DMSO, Biological replicate 1	PDL, DMSO, Biological replicate 2	PDL, Noc, Biological replicate 1	PDL, Noc, Biological replicate 2	FN, DMSO, Biological replicate 1	FN, DMSO, Biological replicate 2	FN, Noc, Biological replicate 1	FN, Noc, Biological replicate 2	PDL, DMSO, Biological replicate 1	PDL, DMSO, Biological replicate 2	PDL, Noc, Biological replicate 1	PDL, Noc, Biological replicate 2
1	Serum albumin precursor	IPI00708398	69 kDa	1246	1162	1167	972	10888	11112	8350	8389	3.53997	2.98385	3.17767	2.66309	30.7849	36.2438	24.1385	31.5092	0.051304	0.0432442	0.0460532	0.0385955	0.446158	0.525273	0.349834	0.456655
2	Vimentin	IPI00418471	54 kDa	4732	3866	3408	3309	1066	1203	1022	1455	13.4439	9.92733	9.27978	9.066	3.01402	3.92381	2.95444	5.46499	0.248962	0.183839	0.171848	0.167889	0.0558153	0.0726631	0.0547119	0.101204
3	similar to fibronectin 1 isoform 4 preproprotein isoform 10	IPI00714673	253 kDa	3724	2760	3754	2423	175	118	181	43	10.5801	7.08728	10.2219	6.63854	0.494798	0.384879	0.523242	0.161508	0.0418188	0.028013	0.0404028	0.0262393	0.00195572	0.00152126	0.00206815	0.000638373
4	Isoform 1 of Collagen alpha-3(VI) chain	IPI00022200	344 kDa	2828	2520	3475	2489	555	378	499	159	8.03455	6.471	9.46222	6.81936	1.56922	1.23292	1.44253	0.597206	0.0233562	0.018811	0.0275065	0.0198237	0.00456167	0.00358406	0.0041934	0.00173606
5	Trypsin - Sus scrofa (Pig).	MAN00000761	24 kDa	856	775	851	652	872	747	678	735	2.43196	1.99009	2.31722	1.78635	2.46551	2.43648	1.95999	2.76067	0.101332	0.0829203	0.0965509	0.0744313	0.102729	0.10152	0.0816663	0.115028
6	Keratin, type II cytoskeletal 1	IPI00220327	66 kDa	722	837	845	995	755	925	846	906	2.05125	2.1493	2.30088	2.7261	2.1347	3.01706	2.44565	3.40294	0.0310796	0.0325651	0.0348619	0.0413046	0.0323439	0.045713	0.0370553	0.0515598
7	Isoform 1 of Collagen alpha-1(XII) chain	IPI00329573	333 kDa	209	160	238	188	1048	1023	1241	1242	0.593784	0.410857	0.64806	0.515083	2.96313	3.3367	3.58753	4.66496	0.00178313	0.0012338	0.00194613	0.00154679	0.00889829	0.0100201	0.0107734	0.0140089
8	Isoform 4 of Tenascin	IPI00220213	231 kDa	1323	1137	1270	993	195	135	162	64	3.75874	2.91965	3.45813	2.72062	0.551346	0.440327	0.468316	0.240385	0.0162716	0.0126392	0.0149703	0.0117776	0.00238678	0.00190618	0.00202734	0.00104063
9	Keratin, type I cytoskeletal 10	IPI00009865	59 kDa	522	605	667	688	580	574	621	660	1.48304	1.55355	1.8162	1.88498	1.6399	1.87221	1.79521	2.47897	0.0251363	0.0263314	0.0307831	0.0319489	0.0277949	0.0317323	0.0304273	0.0420164
10	Isoform 1 of Fibronectin	IPI00022418	263 kDa	3119	2455	3147	2189	389	271	356	92	8.8613	6.30409	8.56909	5.99742	1.09986	0.883917	1.02914	0.345553	0.0336932	0.0239699	0.0325821	0.0228039	0.00418199	0.0033609	0.00391308	0.00131389
11	Isoform 1 of Myosin-9	IPI00019502	227 kDa	168	1123	305	693	650	571	663	314	0.4773	2.8837	0.830497	1.89868	1.83782	1.86242	1.91663	1.17939	0.00210264	0.0127035	0.00365858	0.00836424	0.00809612	0.0082045	0.0084433	0.00519554
12	Keratin, type II cytoskeletal 2 epidermal	IPI00021304	66 kDa	408	525	567	574	509	561	513	609	1.15916	1.34812	1.54391	1.57265	1.43915	1.82981	1.483	2.28741	0.017563	0.0204261	0.0233925	0.023828	0.0218054	0.0277243	0.0224697	0.0346577
13	Talin-1	IPI00298994	270 kDa	617	1027	1088	1282	42	47	51	26	1.75294	2.63719	2.96256	3.51242	0.118751	0.153299	0.147433	0.0976562	0.00649237	0.00976736	0.0109724	0.013009	0.00043982	0.000567775	0.000546048	0.00036169
14	Thrombospondin-1	IPI00296099	129 kDa	736	521	623	538	433	65	429	77	2.09103	1.33785	1.69639	1.47401	1.22427	0.21201	1.24017	0.289213	0.0162095	0.010371	0.0131503	0.0114265	0.00949047	0.00164348	0.00961373	0.00224196
15	Basement membrane-specific heparan sulfate proteoglycan core protein	IPI00024284	469 kDa	484	523	442	483	252	517	287	482	1.37508	1.34299	1.20354	1.32332	0.712508	1.68629	0.829672	1.8104	0.00293194	0.00286351	0.00256618	0.00282159	0.00151921	0.0035955	0.00176902	0.00386012
16	Keratin, type I cytoskeletal 9	IPI00019359	62 kDa	350	383	349	502	377	415	390	508	0.994375	0.983489	0.950306	1.37538	1.06594	1.3536	1.12743	1.90805	0.0160383	0.0158627	0.0153275	0.0221836	0.0171925	0.0218322	0.0181843	0.030775
17	Prolow-density lipoprotein receptor-related protein 1	IPI00020557	505 kDa	35	46	26	34	916	537	946	529	0.0994375	0.118121	0.0707965	0.0931532	2.58991	1.75152	2.73474	1.98693	0.000196906	0.000233904	0.000140191	0.000184462	0.00512854	0.00346837	0.00541532	0.00393451
18	Actin, cytoplasmic 1	IPI00021439	42 kDa	151	256	221	283	688	193	758	237	0.429002	0.657371	0.60177	0.775364	1.94526	0.629505	2.19126	0.890174	0.0102143	0.0156517	0.0143279	0.018461	0.0463157	0.0149882	0.0521728	0.0211946
19	Collagen alpha-1(VI) chain	IPI00291136	109 kDa	580	518	838	525	117	85	144	26	1.64782	1.33015	2.28182	1.4384	0.330808	0.277243	0.416281	0.0976562	0.0151176	0.0122032	0.0209342	0.0131963	0.00303493	0.00254352	0.00381909	0.000895929
20	Isoform 1 of Plectin-1	IPI00014898	532 kDa	386	634	587	834	29	194	35	79	1.09665	1.62802	1.59837	2.28499	0.081995	0.632767	0.101179	0.296725	0.00206138	0.00306019	0.00300445	0.0042951	0.000154126	0.00118941	0.000190187	0.000557753
21	Collagen alpha-1(I) chain	IPI00297646	139 kDa	641	558	662	500	14	15	12	1	1.82113	1.43286	1.80259	1.3699	0.0395838	0.0489253	0.0346901	0.00375601	0.0131016	0.0103084	0.0129683	0.0098554	0.000284776	0.00035198	0.000249569	2.70217e-05
22	Tubulin beta chain	IPI00909140	50 kDa	37	43	46	46	648	278	818	243	0.10512	0.110418	0.125255	0.126031	1.83216	0.906748	2.36471	0.91271	0.00210239	0.00220836	0.00250511	0.00252062	0.0366433	0.018135	0.0472942	0.0182542
23	Isoform 1 of Vinculin	IPI00291175	117 kDa	309	481	679	638	1	1	1	5	0.877891	1.23514	1.84888	1.74799	0.00282741	0.00326168	0.00289084	0.01878	0.00750334	0.0105567	0.0158024	0.0149401	2.41659e-05	2.78776e-05	2.4708e-05	0.000160513
24	EMILIN-1	IPI00013079	107 kDa	328	458	271	408	148	214	135	204	0.931871	1.17608	0.737917	1.11784	0.418457	0.698001	0.390264	0.766226	0.00870908	0.0109914	0.00689642	0.0104471	0.00391082	0.00652337	0.00364732	0.00716099
25	40S ribosomal protein S18	IPI00013296	18 kDa	192	280	173	238	265	350	234	242	0.545486	0.719	0.471069	0.652073	0.749265	1.14159	0.676457	0.908954	0.0303048	0.0399444	0.0261705	0.0362263	0.0416258	0.0634217	0.0375809	0.0504975
26	Isoform 1 of Protein-glutamine gamma-glutamyltransferase 2	IPI00294578	77 kDa	464	422	400	317	86	11	97	5	1.31826	1.08364	1.08918	0.868517	0.243158	0.0358785	0.280412	0.01878	0.0171202	0.0140732	0.0141451	0.0112794	0.00315789	0.000465955	0.00364171	0.000243897
27	Collagen alpha-2(I) chain	IPI00304962	129 kDa	492	496	550	416	11	18	8	0	1.39781	1.27366	1.49762	1.13976	0.0311016	0.0587103	0.0231267	0	0.0108357	0.00987331	0.0116094	0.00883533	0.000241097	0.000455119	0.000179277	0
28	Isoform 1 of Protein KIAA1199	IPI00376689	153 kDa	188	338	138	221	224	106	279	103	0.534121	0.867935	0.375766	0.605496	0.633341	0.345739	0.806545	0.386869	0.00349099	0.00567278	0.00245599	0.00395749	0.00413948	0.00225973	0.00527154	0.00252856
29	Fibrillin-1	IPI00328113	312 kDa	458	302	309	251	144	125	131	20	1.30121	0.775492	0.841389	0.68769	0.407148	0.407711	0.3787	0.0751202	0.00417055	0.00248555	0.00269676	0.00220413	0.00130496	0.00130676	0.00121378	0.00024077
30	Isoform 2 of Filamin-A	IPI00302592	280 kDa	199	342	423	554	50	18	68	22	0.565373	0.878207	1.1518	1.51785	0.141371	0.0587103	0.196577	0.0826322	0.00201919	0.00313645	0.00411359	0.00542089	0.000504895	0.00020968	0.000702062	0.000295115
31	Isoform 1 of Peroxidasin homolog	IPI00016112	165 kDa	365	459	319	362	8	8	7	7	1.03699	1.17865	0.868618	0.991808	0.0226193	0.0260935	0.0202359	0.0262921	0.00628479	0.00714331	0.00526435	0.00601096	0.000137087	0.000158142	0.000122642	0.000159346
32	Isoform 2C2 of Collagen alpha-2(VI) chain	IPI00304840	109 kDa	347	292	422	317	48	22	44	9	0.985851	0.749814	1.14908	0.868517	0.135716	0.0717571	0.127197	0.0338041	0.00904451	0.00687903	0.010542	0.00796805	0.0012451	0.000658322	0.00116695	0.000310129
33	cDNA FLJ60097, highly similar to Tubulin alpha-ubiquitous chain	IPI00792677	46 kDa	9	14	19	29	402	184	492	153	0.0255696	0.03595	0.0517359	0.0794542	1.13662	0.60015	1.42229	0.574669	0.000555862	0.000781521	0.00112469	0.00172727	0.0247091	0.0130467	0.0309194	0.0124928
34	Histone H4	IPI00453473	11 kDa	80	107	86	61	222	242	242	238	0.227286	0.274761	0.234173	0.167128	0.627686	0.789328	0.699584	0.89393	0.0206623	0.0249782	0.0212884	0.0151934	0.0570624	0.0717571	0.0635985	0.0812664
35	40S ribosomal protein S16	IPI00221092	16 kDa	119	190	130	135	135	187	147	154	0.338087	0.487893	0.353982	0.369873	0.381701	0.609935	0.424954	0.578425	0.0211305	0.0304933	0.0221239	0.0231171	0.0238563	0.0381209	0.0265596	0.0361516
36	Agrin	IPI00374563	215 kDa	38	66	30	54	127	418	129	310	0.107961	0.169478	0.0816882	0.147949	0.359082	1.36338	0.372919	1.16436	0.000502143	0.000788272	0.000379945	0.000688136	0.00167015	0.00634132	0.00173451	0.00541564
37	Keratin, type I cytoskeletal 14	IPI00384444	52 kDa	181	225	263	272	228	243	287	284	0.514234	0.577768	0.716133	0.745226	0.644651	0.792589	0.829672	1.06671	0.00988911	0.0111109	0.0137718	0.0143313	0.0123971	0.0152421	0.0159552	0.0205136
38	Transforming growth factor-beta-induced protein ig-h3	IPI00018219	75 kDa	189	310	150	235	32	91	16	65	0.536962	0.796035	0.408441	0.643853	0.0904773	0.296813	0.0462535	0.244141	0.0071595	0.0106138	0.00544588	0.00858471	0.00120636	0.00395751	0.000616713	0.00325521
39	Laminin subunit gamma-1	IPI00298281	178 kDa	140	136	127	139	200	160	231	115	0.39775	0.349228	0.345813	0.380832	0.565483	0.52187	0.667784	0.431941	0.00223455	0.00196196	0.00194277	0.00213951	0.00317687	0.00293185	0.0037516	0.00242664
40	40S ribosomal protein S4, X isoform	IPI00217030	30 kDa	83	116	67	93	123	216	119	160	0.235809	0.297871	0.182437	0.254802	0.347772	0.704524	0.34401	0.600962	0.0078603	0.00992904	0.00608123	0.00849338	0.0115924	0.0234841	0.011467	0.0200321
41	Keratin, type II cytoskeletal 5	IPI00009867	62 kDa	149	212	226	210	213	210	252	219	0.42332	0.544385	0.615385	0.575358	0.602239	0.684954	0.728492	0.822566	0.00682773	0.00878041	0.00992556	0.00927997	0.00971354	0.0110476	0.0117499	0.0132672
42	Isoform 1 of Fibrillin-2	IPI00019439	315 kDa	350	167	259	153	70	26	52	6	0.994375	0.428832	0.705242	0.41919	0.197919	0.0848038	0.150324	0.0225361	0.00315675	0.00136137	0.00223886	0.00133076	0.000628314	0.000269218	0.000477218	7.1543e-05
43	Neuroblast differentiation-associated protein AHNAK	IPI00021812	629 kDa	86	159	173	239	113	40	36	19	0.244332	0.408289	0.471069	0.654812	0.319498	0.130467	0.10407	0.0713642	0.000388445	0.000649108	0.000748917	0.00104104	0.000507946	0.00020742	0.000165454	0.000113457
44	40S ribosomal protein S14	IPI00026271	16 kDa	106	155	101	123	100	128	82	97	0.301153	0.398018	0.275017	0.336996	0.282741	0.417496	0.237049	0.364333	0.0188221	0.0248761	0.0171886	0.0210622	0.0176713	0.0260935	0.0148156	0.0227708
45	Histone H2A type 1-H	IPI00081836	14 kDa	113	112	131	100	92	94	102	97	0.321041	0.2876	0.356705	0.27398	0.260122	0.306598	0.294866	0.364333	0.0229315	0.0205428	0.0254789	0.01957	0.0185802	0.0218999	0.0210618	0.0260238
46	Isoform 2 of Annexin A2	IPI00418169	40 kDa	89	134	93	152	130	46	186	40	0.252855	0.344093	0.253233	0.41645	0.367564	0.150038	0.537697	0.15024	0.00632138	0.00860232	0.00633084	0.0104112	0.0091891	0.00375094	0.0134424	0.00375601
47	Isoform APP770 of Amyloid beta A4 protein (Fragment)	IPI00006608	87 kDa	0	0	0	0	287	105	282	140	0	0	0	0	0.811468	0.342477	0.815217	0.525841	0	0	0	0	0.00932722	0.00393652	0.00937031	0.00604415
48	Putative uncharacterized protein BGN	IPI00643384	35 kDa	0	0	0	0	194	256	154	239	0	0	0	0	0.548518	0.834991	0.44519	0.897686	0	0	0	0	0.015672	0.0238569	0.0127197	0.0256482
49	60S ribosomal protein L7	IPI00030179	29 kDa	73	71	80	65	117	120	101	136	0.207398	0.182318	0.217835	0.178087	0.330808	0.391402	0.291975	0.510817	0.00715166	0.00628682	0.00751156	0.00614093	0.0114072	0.0134966	0.0100681	0.0176144
50	cDNA FLJ56912, highly similar to Fibulin-2	IPI00023824	129 kDa	215	168	201	141	92	2	102	0	0.61083	0.4314	0.547311	0.386312	0.260122	0.00652337	0.294866	0	0.00473512	0.00334418	0.00424272	0.00299467	0.00201645	5.05688e-05	0.00228578	0
51	Matrix-remodeling-associated protein 5	IPI00012347	312 kDa	178	240	82	100	18	45	18	19	0.505711	0.616285	0.223281	0.27398	0.0508935	0.146776	0.0520352	0.0713642	0.00162087	0.00197527	0.000715645	0.000878141	0.00016312	0.000470435	0.000166779	0.000228731
52	Isoform A of Decorin	IPI00012119	40 kDa	0	0	0	0	185	179	169	175	0	0	0	0	0.523072	0.583842	0.488552	0.657302	0	0	0	0	0.0130768	0.014596	0.0122138	0.0164325
53	200 kDa protein	IPI00853454	200 kDa	61	89	64	95	83	74	116	69	0.173305	0.228539	0.174268	0.260281	0.234675	0.241365	0.335338	0.259165	0.000866527	0.0011427	0.000871341	0.00130141	0.00117338	0.00120682	0.00167669	0.00129582
54	60S ribosomal protein L23	IPI00010153	15 kDa	66	115	88	59	102	115	88	47	0.187511	0.295303	0.239619	0.161648	0.288396	0.375094	0.254394	0.176532	0.0125007	0.0196869	0.0159746	0.0107766	0.0192264	0.0250063	0.0169596	0.0117688
55	Isoform 2 of Heat shock protein HSP 90-alpha	IPI00382470	98 kDa	1	12	0	3	238	78	254	90	0.00284107	0.0308143	0	0.0082194	0.672925	0.254411	0.734274	0.338041	2.89905e-05	0.000314431	0	8.38715e-05	0.00686658	0.00259603	0.00749259	0.0034494
56	ubiquitin and ribosomal protein S27a precursor	IPI00179330	18 kDa	63	51	51	45	96	76	93	54	0.178987	0.130961	0.13887	0.123291	0.271432	0.247888	0.268848	0.202825	0.00994375	0.00727559	0.007715	0.0068495	0.0150795	0.0137716	0.014936	0.011268
57	Alpha-actinin-4	IPI00013808	105 kDa	66	130	207	245	15	0	24	2	0.187511	0.333821	0.563649	0.671251	0.0424112	0	0.0693802	0.00751202	0.00178582	0.00317925	0.00536808	0.00639287	0.000403916	0	0.000660764	7.1543e-05
58	Isoform Beta-1A of Integrin beta-1	IPI00217563	88 kDa	166	173	182	170	6	1	5	0	0.471618	0.444239	0.495575	0.465766	0.0169645	0.00326168	0.0144542	0	0.00535929	0.00504817	0.00563154	0.0052928	0.000192778	3.70646e-05	0.000164252	0
59	40S ribosomal protein S13	IPI00221089	17 kDa	84	105	93	92	61	75	56	63	0.23865	0.269625	0.253233	0.252062	0.172472	0.244626	0.161887	0.236629	0.0140382	0.0158603	0.0148961	0.0148272	0.0101454	0.0143898	0.00952277	0.0139193
60	Histone H2B type 1-M	IPI00554798	14 kDa	79	65	83	57	45	49	64	64	0.224445	0.166911	0.226004	0.156169	0.127234	0.159823	0.185014	0.240385	0.0160318	0.0119222	0.0161431	0.0111549	0.00908812	0.0114159	0.0132153	0.0171703
61	Talin-2	IPI00219299	272 kDa	166	310	228	327	3	9	0	5	0.471618	0.796035	0.62083	0.895915	0.00848224	0.0293552	0	0.01878	0.00173389	0.0029266	0.00228247	0.0032938	3.11847e-05	0.000107923	0	6.90443e-05
62	40S ribosomal protein S11	IPI00025091	18 kDa	43	70	43	59	63	79	57	59	0.122166	0.17975	0.117086	0.161648	0.178127	0.257673	0.164778	0.221605	0.006787	0.00998611	0.0065048	0.00898046	0.00989595	0.0143152	0.00915433	0.0123114
63	Protein CYR61	IPI00299219	42 kDa	142	143	127	121	7	8	19	3	0.403432	0.367203	0.345813	0.331516	0.0197919	0.0260935	0.054926	0.011268	0.00960552	0.00874294	0.00823365	0.00789324	0.000471236	0.000621273	0.00130776	0.000268286
64	60S ribosomal protein L17	IPI00413324	21 kDa	40	69	41	41	68	120	73	79	0.113643	0.177182	0.111641	0.112332	0.192264	0.391402	0.211031	0.296725	0.00541156	0.00843724	0.00531622	0.00534914	0.00915544	0.0186382	0.0100491	0.0141298
65	TNS1 protein	IPI00925950	183 kDa	91	163	121	221	0	3	0	0	0.258537	0.41856	0.329476	0.605496	0	0.00978505	0	0	0.00141277	0.00228722	0.00180041	0.00330872	0	5.34702e-05	0	0
66	Isoform 1 of Adipocyte enhancer-binding protein 1	IPI00745313	131 kDa	68	35	71	34	155	24	176	38	0.193193	0.0898749	0.193329	0.0931532	0.438249	0.0782804	0.508788	0.142728	0.00147475	0.000686068	0.00147579	0.000711093	0.00334541	0.000597561	0.00388388	0.00108953
67	40S ribosomal protein S3	IPI00011253	27 kDa	58	65	28	90	80	64	100	61	0.164782	0.166911	0.0762423	0.246582	0.226193	0.208748	0.289084	0.229117	0.00610304	0.00618187	0.00282379	0.00913267	0.00837752	0.0077314	0.0107068	0.0084858
68	Isoform 1 of Laminin subunit alpha-4	IPI00329482	203 kDa	36	57	35	79	106	69	128	71	0.102279	0.146368	0.0953029	0.216444	0.299706	0.225056	0.370028	0.266677	0.000503835	0.000721023	0.000469473	0.00106623	0.00147638	0.00110865	0.0018228	0.00131368
69	40S ribosomal protein S3a	IPI00419880	30 kDa	62	107	36	86	50	66	52	67	0.176146	0.274761	0.0980259	0.235623	0.141371	0.215271	0.150324	0.251653	0.00587155	0.00915868	0.00326753	0.0078541	0.00471236	0.00717571	0.00501079	0.00838842
70	Isoform 1 of Collagen alpha-1(III) chain	IPI00021033	139 kDa	179	152	120	126	0	2	1	0	0.508552	0.390314	0.326753	0.345215	0	0.00652337	0.00289084	0	0.00365864	0.00280801	0.00235074	0.00248356	0	4.69307e-05	2.07974e-05	0
71	Integrin alpha-5	IPI00306604	115 kDa	108	133	158	132	7	3	8	0	0.306836	0.341525	0.430225	0.361654	0.0197919	0.00978505	0.0231267	0	0.00266814	0.00296978	0.00374108	0.00314482	0.000172103	8.50874e-05	0.000201102	0
72	Isoform 1 of Amyloid-like protein 2	IPI00031030	87 kDa	0	0	0	0	132	139	146	151	0	0	0	0	0.373219	0.453374	0.422063	0.567157	0	0	0	0	0.00428987	0.0052112	0.0048513	0.00651905
73	60S ribosomal protein L10	IPI00554723	25 kDa	23	43	22	25	73	115	52	57	0.0653446	0.110418	0.0599047	0.068495	0.206401	0.375094	0.150324	0.214093	0.00261378	0.00441671	0.00239619	0.0027398	0.00825605	0.0150038	0.00601295	0.0085637
74	Serine protease HTRA1	IPI00003176	51 kDa	87	101	64	79	41	54	35	42	0.247173	0.259353	0.174268	0.216444	0.115924	0.176131	0.101179	0.157752	0.00484653	0.00508536	0.00341702	0.00424401	0.00227302	0.00345355	0.00198391	0.00309318
75	60S ribosomal protein L35	IPI00412607	15 kDa	53	67	36	48	66	74	56	67	0.150577	0.172046	0.0980259	0.13151	0.186609	0.241365	0.161887	0.251653	0.0100384	0.0114698	0.00653506	0.00876736	0.0124406	0.016091	0.0107925	0.0167768
76	40S ribosomal protein S25	IPI00012750	14 kDa	43	81	41	78	38	71	33	70	0.122166	0.207996	0.111641	0.213704	0.107442	0.23158	0.0953978	0.262921	0.00872615	0.0148569	0.00797433	0.0152646	0.00767441	0.0165414	0.00681413	0.01878
77	60S ribosomal protein L21	IPI00247583	19 kDa	35	47	27	40	78	82	59	59	0.0994375	0.120689	0.0735194	0.109592	0.220538	0.267458	0.17056	0.221605	0.00523355	0.00635206	0.00386944	0.005768	0.0116073	0.0140767	0.00897682	0.0116634
78	40S ribosomal protein S19	IPI00215780	16 kDa	54	74	74	65	39	67	32	62	0.153418	0.190021	0.201498	0.178087	0.110269	0.218533	0.0925069	0.232873	0.00958861	0.0118763	0.0125936	0.0111304	0.00689182	0.0136583	0.00578168	0.0145545
79	60S ribosomal protein L5	IPI00000494	34 kDa	57	27	23	54	55	68	56	77	0.161941	0.0693321	0.0626276	0.147949	0.155508	0.221795	0.161887	0.289213	0.00476297	0.00203918	0.00184199	0.00435145	0.00457376	0.00652337	0.00476139	0.00850626
80	Rac GTPase-activating protein 1	IPI00152946	71 kDa	0	418	0	61	0	43	0	9	0	1.07336	0	0.167128	0	0.140252	0	0.0338041	0	0.0151178	0	0.00235391	0	0.00197539	0	0.000476114
81	Histone H3.1	IPI00465070	15 kDa	18	24	20	13	58	57	72	65	0.0511393	0.0616285	0.0544588	0.0356174	0.16399	0.185916	0.208141	0.244141	0.00340928	0.00410857	0.00363059	0.00237449	0.0109327	0.0123944	0.013876	0.016276
82	Lactadherin	IPI00002236	43 kDa	93	153	90	101	10	8	15	10	0.26422	0.392882	0.245065	0.27672	0.0282741	0.0260935	0.0433626	0.0375601	0.00614464	0.00913679	0.00569918	0.00643535	0.000657538	0.000606825	0.00100843	0.000873491
83	Isoform 2 of Protein Wnt-5a	IPI00013178	41 kDa	52	82	31	49	30	90	31	75	0.147736	0.210564	0.0844112	0.13425	0.0848224	0.293552	0.0896161	0.281701	0.00360331	0.00513571	0.00205881	0.0032744	0.00206884	0.0071598	0.00218576	0.00687075
84	Galectin-1	IPI00219219	15 kDa	95	71	83	61	42	12	37	8	0.269902	0.182318	0.226004	0.167128	0.118751	0.0391402	0.106961	0.0300481	0.0179934	0.0121545	0.0150669	0.0111419	0.00791676	0.00260935	0.00713074	0.00200321
85	Glypican-1	IPI00015688	62 kDa	0	2	1	1	59	176	62	159	0	0.00513571	0.00272294	0.0027398	0.166817	0.574057	0.179232	0.597206	0	8.28341e-05	4.39184e-05	4.41903e-05	0.0026906	0.00925898	0.00289084	0.00963235
86	60S ribosomal protein L13a	IPI00304612	24 kDa	33	33	21	23	37	52	35	49	0.0937553	0.0847392	0.0571818	0.0630154	0.104614	0.169608	0.101179	0.184044	0.00390647	0.0035308	0.00238257	0.00262564	0.00435893	0.00706698	0.00421581	0.00766852
87	Metalloproteinase inhibitor 3	IPI00218247	24 kDa	92	110	76	73	21	21	23	17	0.261378	0.282464	0.206943	0.200005	0.0593757	0.0684954	0.0664894	0.0638522	0.0108908	0.0117693	0.00862265	0.00833356	0.00247399	0.00285397	0.00277039	0.00266051
88	Keratin, type II cytoskeletal 6A	IPI00300725	60 kDa	118	183	190	159	165	160	174	188	0.335246	0.469918	0.517359	0.435628	0.466523	0.52187	0.503006	0.70613	0.00558744	0.00783196	0.00862265	0.00726047	0.00777539	0.00869783	0.00838344	0.0117688
89	Collagen alpha-2(IV) chain	IPI00306322	168 kDa	77	130	66	117	16	13	10	1	0.218762	0.333821	0.179714	0.320557	0.0452386	0.0424019	0.0289084	0.00375601	0.00130216	0.00198703	0.00106973	0.00190808	0.000269278	0.000252392	0.000172074	2.23572e-05
90	Isoform 1 of Filamin-C	IPI00178352	291 kDa	53	129	156	217	8	6	13	4	0.150577	0.331253	0.424779	0.594537	0.0226193	0.0195701	0.0375809	0.015024	0.000517446	0.00113833	0.00145972	0.00204308	7.77296e-05	6.72512e-05	0.000129144	5.1629e-05
91	Elongation factor 1-alpha 1	IPI00396485	50 kDa	25	34	27	35	92	30	139	50	0.0710268	0.0873071	0.0735194	0.095893	0.260122	0.0978505	0.401827	0.1878	0.00142054	0.00174614	0.00147039	0.00191786	0.00520244	0.00195701	0.00803654	0.00375601
92	Glyceraldehyde-3-phosphate dehydrogenase	IPI00219018	36 kDa	38	24	33	39	80	37	98	59	0.107961	0.0616285	0.089857	0.106852	0.226193	0.120682	0.283302	0.221605	0.00299891	0.0017119	0.00249603	0.00296812	0.00628314	0.00335229	0.00786951	0.00615568
93	40S ribosomal protein S23	IPI00218606	16 kDa	30	53	33	41	59	90	57	39	0.0852321	0.136096	0.089857	0.112332	0.166817	0.293552	0.164778	0.146484	0.00532701	0.00850602	0.00561607	0.00702074	0.0104261	0.018347	0.0102986	0.00915527
94	Isoform A of Lamin-A/C	IPI00021405	74 kDa	44	126	35	24	38	8	43	16	0.125007	0.32355	0.0953029	0.0657552	0.107442	0.0260935	0.124306	0.0600962	0.00168929	0.00437229	0.00128788	0.000888584	0.00145192	0.000352615	0.00167981	0.00081211
95	Isoform 1 of Heat shock cognate 71 kDa protein	IPI00003865	71 kDa	62	83	55	82	17	12	37	26	0.176146	0.213132	0.149762	0.224664	0.048066	0.0391402	0.106961	0.0976562	0.00248093	0.00300186	0.00210932	0.00316428	0.000676987	0.000551271	0.0015065	0.00137544
96	Isoform 2 of Collagen alpha-1(XVIII) chain	IPI00022822	154 kDa	56	74	55	70	38	56	35	26	0.1591	0.190021	0.149762	0.191786	0.107442	0.182654	0.101179	0.0976562	0.00103312	0.0012339	0.000972479	0.00124536	0.000697674	0.00118607	0.00065701	0.000634131
97	60S ribosomal protein L23a	IPI00021266	18 kDa	55	56	34	72	8	32	9	31	0.156259	0.1438	0.09258	0.197266	0.0226193	0.104374	0.0260176	0.116436	0.00868105	0.00798888	0.00514333	0.0109592	0.00125663	0.00579855	0.00144542	0.00646868
98	60S ribosomal protein L24	IPI00306332	18 kDa	29	29	15	14	101	68	68	41	0.082391	0.0744678	0.0408441	0.0383572	0.285569	0.221795	0.196577	0.153996	0.00457728	0.0041371	0.00226912	0.00213096	0.0158649	0.0123219	0.010921	0.00855536
99	actinin, alpha 1 isoform a	IPI00759776	106 kDa	60	142	190	270	31	1	47	3	0.170464	0.364635	0.517359	0.739746	0.0876499	0.00326168	0.13587	0.011268	0.00160815	0.00343996	0.00488074	0.00697874	0.000826885	3.07706e-05	0.00128179	0.000106302
100	Insulin-like growth factor-binding protein 5	IPI00029236	31 kDa	77	85	75	64	2	4	1	2	0.218762	0.218268	0.204221	0.175347	0.00565483	0.0130467	0.00289084	0.00751202	0.00705685	0.00704089	0.00658776	0.00565636	0.000182414	0.000420863	9.3253e-05	0.000242323
101	40S ribosomal protein S17	IPI00221093	16 kDa	55	50	61	53	14	35	17	25	0.156259	0.128393	0.166099	0.145209	0.0395838	0.114159	0.0491443	0.0939002	0.00976618	0.00802455	0.0103812	0.00907559	0.00247399	0.00713494	0.00307152	0.00586877
102	Junction plakoglobin	IPI00554711	82 kDa	9	29	55	48	37	29	56	41	0.0255696	0.0744678	0.149762	0.13151	0.104614	0.0945889	0.161887	0.153996	0.000311825	0.000908144	0.00182636	0.00160379	0.00127578	0.00115352	0.00197423	0.001878
103	60S ribosomal protein L31	IPI00026302	14 kDa	64	85	43	71	9	18	9	22	0.181829	0.218268	0.117086	0.194526	0.0254467	0.0587103	0.0260176	0.0826322	0.0129878	0.0155906	0.00836332	0.0138947	0.00181762	0.00419359	0.0018584	0.0059023
104	Isoform 1 of Sushi repeat-containing protein SRPX	IPI00289795	52 kDa	21	43	24	27	43	94	35	81	0.0596625	0.110418	0.0653506	0.0739746	0.121579	0.306598	0.101179	0.304237	0.00114736	0.00212342	0.00125674	0.00142259	0.00233805	0.00589612	0.00194576	0.00585071
105	Isoform 1 of Tensin-3	IPI00658152	155 kDa	43	112	88	160	0	5	1	0	0.122166	0.2876	0.239619	0.438368	0	0.0163084	0.00289084	0	0.000788168	0.00185548	0.00154593	0.00282818	0	0.000105216	1.86506e-05	0
106	Heat shock protein HSP 90-beta	IPI00414676	83 kDa	0	19	0	3	273	104	284	116	0	0.0487893	0	0.0082194	0.771884	0.339215	0.820999	0.435697	0	0.000587822	0	9.9029e-05	0.00929981	0.00408693	0.00989156	0.00524936
107	Isoform 1 of Coiled-coil domain-containing protein 80	IPI00260630	108 kDa	90	131	38	71	0	0	0	0	0.255696	0.336389	0.103472	0.194526	0	0	0	0	0.00236756	0.00311471	0.000958072	0.00180117	0	0	0	0
108	60S ribosomal protein L26	IPI00027270	17 kDa	61	48	50	57	14	21	18	24	0.173305	0.123257	0.136147	0.156169	0.0395838	0.0684954	0.0520352	0.0901442	0.0101944	0.00725042	0.00800865	0.00918639	0.00232846	0.00402914	0.00306089	0.0053026
109	Transitional endoplasmic reticulum ATPase	IPI00022774	89 kDa	0	0	0	0	142	36	162	39	0	0	0	0	0.401493	0.117421	0.468316	0.146484	0	0	0	0	0.00451116	0.00131933	0.00526198	0.00164589
110	A disintegrin and metalloproteinase with thrombospondin motifs 1	IPI00005908	105 kDa	82	126	71	77	3	1	4	4	0.232968	0.32355	0.193329	0.210965	0.00848224	0.00326168	0.0115634	0.015024	0.00221874	0.00308143	0.00184123	0.00200919	8.07833e-05	3.10637e-05	0.000110127	0.000143086
111	60S ribosomal protein L27	IPI00219155	16 kDa	38	46	39	35	19	32	17	30	0.107961	0.118121	0.106195	0.095893	0.0537209	0.104374	0.0491443	0.11268	0.00674754	0.00738258	0.00663717	0.00599331	0.00335755	0.00652337	0.00307152	0.00704252
112	Laminin subunit alpha-5	IPI00783665	400 kDa	80	93	58	67	4	14	0	14	0.227286	0.238811	0.157931	0.183567	0.0113097	0.0456636	0	0.0525841	0.000568214	0.000597026	0.000394826	0.000458917	2.82741e-05	0.000114159	0	0.00013146
113	40S ribosomal protein S9	IPI00221088	23 kDa	24	28	25	15	52	51	54	41	0.0681857	0.0719	0.0680735	0.041097	0.147026	0.166346	0.156105	0.153996	0.0029646	0.00312609	0.00295972	0.00178683	0.00639242	0.00723243	0.00678719	0.0066955
114	Desmoglein-1	IPI00025753	114 kDa	13	47	40	50	41	48	53	54	0.0369339	0.120689	0.108918	0.13699	0.115924	0.156561	0.153215	0.202825	0.000323982	0.00105868	0.000955418	0.00120167	0.00101688	0.00137334	0.00134399	0.00177916
115	60S ribosomal protein L32	IPI00395998	16 kDa	25	23	30	20	61	62	49	36	0.0710268	0.0590607	0.0816882	0.054796	0.172472	0.202224	0.141651	0.135216	0.00443917	0.00369129	0.00510551	0.00342475	0.0107795	0.012639	0.0088532	0.00845102
116	60S ribosomal protein L3	IPI00550021	46 kDa	25	30	28	20	49	68	56	51	0.0710268	0.0770357	0.0762423	0.054796	0.138543	0.221795	0.161887	0.191556	0.00154406	0.00167469	0.00165744	0.00119122	0.00301181	0.00482162	0.00351929	0.00416427
117	Nestin	IPI00010800	177 kDa	105	88	33	86	5	12	13	8	0.298312	0.225971	0.089857	0.235623	0.0141371	0.0391402	0.0375809	0.0300481	0.00168538	0.00127667	0.000507667	0.0013312	7.98705e-05	0.000221131	0.000212322	0.000169763
118	Isoform 1 of 60S ribosomal protein L11	IPI00376798	20 kDa	34	50	33	51	41	61	32	58	0.0965964	0.128393	0.089857	0.13973	0.115924	0.198963	0.0925069	0.217849	0.00482982	0.00641964	0.00449285	0.00698649	0.0057962	0.00994814	0.00462535	0.0108924
119	IPI:MAN00000009.0|SWISS-PROT:P00330|ADH1_YEAST Alcohol dehydrogenase 1 OS=Saccharomyces cerevisiae GN=ADH1 PE=1 SV=4	MAN00000009	37 kDa	41	78	48	54	36	36	9	39	0.116484	0.200293	0.130701	0.147949	0.101787	0.117421	0.0260176	0.146484	0.00314821	0.00541332	0.00353246	0.00399863	0.002751	0.00317353	0.000703178	0.00395904
120	Pentraxin-related protein PTX3	IPI00029568	42 kDa	0	0	3	0	84	60	109	85	0	0	0.00816882	0	0.237503	0.195701	0.315102	0.319261	0	0	0.000194496	0	0.00565483	0.00465955	0.00750242	0.00760145
121	40S ribosomal protein S8	IPI00216587	24 kDa	24	23	10	20	79	64	73	57	0.0681857	0.0590607	0.0272294	0.054796	0.223366	0.208748	0.211031	0.214093	0.00284107	0.00246086	0.00113456	0.00228317	0.00930691	0.00869783	0.00879298	0.00892052
122	40S ribosomal protein S2	IPI00013485	31 kDa	26	23	24	27	46	46	53	53	0.0738678	0.0590607	0.0653506	0.0739746	0.130061	0.150038	0.153215	0.199069	0.00238283	0.00190518	0.00210808	0.00238628	0.00419552	0.00483992	0.00494241	0.00642156
123	Isoform DPI of Desmoplakin	IPI00013933	332 kDa	11	27	53	53	27	51	42	38	0.0312518	0.0693321	0.144316	0.145209	0.0763402	0.166346	0.121415	0.142728	9.41319e-05	0.000208832	0.000434686	0.000437378	0.00022994	0.000501042	0.000365709	0.000429905
124	40S ribosomal protein S15a	IPI00221091	15 kDa	20	45	21	23	39	48	35	24	0.0568214	0.115554	0.0571818	0.0630154	0.110269	0.156561	0.101179	0.0901442	0.00378809	0.00770357	0.00381212	0.00420103	0.00735128	0.0104374	0.0067453	0.00600962
125	Extracellular sulfatase Sulf-1	IPI00293203	101 kDa	44	78	33	45	48	11	40	15	0.125007	0.200293	0.089857	0.123291	0.135716	0.0358785	0.115634	0.0563401	0.00123769	0.0019831	0.000889674	0.0012207	0.00134372	0.000355233	0.00114489	0.000557823
126	Isoform 1 of Nidogen-2	IPI00028908	151 kDa	21	46	26	35	59	33	68	18	0.0596625	0.118121	0.0707965	0.095893	0.166817	0.107636	0.196577	0.0676082	0.000395116	0.000782261	0.000468851	0.000635053	0.00110475	0.000712819	0.00130184	0.000447736
127	Isoform 1 of Neuropilin-1	IPI00299594	103 kDa	0	0	0	1	50	109	69	81	0	0	0	0.0027398	0.141371	0.355524	0.199468	0.304237	0	0	0	2.66e-05	0.00137253	0.00345169	0.00193658	0.00295376
128	Isoform 1 of Fermitin family homolog 2	IPI00000856	78 kDa	43	60	82	107	0	0	0	0	0.122166	0.154071	0.223281	0.293159	0	0	0	0	0.00156623	0.00197527	0.00286258	0.00375845	0	0	0	0
129	Isoform 1 of Nidogen-1	IPI00026944	136 kDa	24	41	32	40	40	26	44	27	0.0681857	0.105282	0.0871341	0.109592	0.113097	0.0848038	0.127197	0.101412	0.000501365	0.000774133	0.000640692	0.000805824	0.000831593	0.000623557	0.000935272	0.000745678
130	Keratin, type I cytoskeletal 16	IPI00217963	51 kDa	151	213	225	235	159	180	216	240	0.429002	0.546953	0.612662	0.643853	0.449559	0.587103	0.624422	0.901442	0.0084118	0.0107246	0.012013	0.0126246	0.00881488	0.0115118	0.0122436	0.0176753
131	EMILIN-2	IPI00012510	116 kDa	61	106	25	76	12	10	4	11	0.173305	0.272193	0.0680735	0.208225	0.033929	0.0326168	0.0115634	0.0413161	0.00149401	0.00234649	0.000586841	0.00179504	0.000292491	0.00028118	9.96842e-05	0.000356173
132	Isoform 1 of Connective tissue growth factor	IPI00020977	38 kDa	80	82	82	72	1	0	2	0	0.227286	0.210564	0.223281	0.197266	0.00282741	0	0.00578168	0	0.0059812	0.00554116	0.00587582	0.0051912	7.44056e-05	0	0.00015215	0
133	filamin B isoform 3	IPI00477536	277 kDa	26	88	119	174	6	0	0	0	0.0738678	0.225971	0.32403	0.476725	0.0169645	0	0	0	0.000266671	0.000815781	0.00116978	0.00172103	6.12436e-05	0	0	0
134	Thrombospondin-2	IPI00018769	130 kDa	109	69	97	58	90	12	108	14	0.309677	0.177182	0.264125	0.158908	0.254467	0.0391402	0.312211	0.0525841	0.00238213	0.00136294	0.00203173	0.00122237	0.00195744	0.000301079	0.00240162	0.000404493
135	40S ribosomal protein S26	IPI00655650	13 kDa	20	37	19	27	45	51	41	30	0.0568214	0.0950107	0.0517359	0.0739746	0.127234	0.166346	0.118525	0.11268	0.00437088	0.00730851	0.00397968	0.00569036	0.0097872	0.0127958	0.00911727	0.00866771
136	Isoform 1 of Polymerase I and transcript release factor	IPI00176903	43 kDa	7	9	10	9	107	27	121	29	0.0198875	0.0231107	0.0272294	0.0246582	0.302533	0.0880655	0.349792	0.108924	0.0004625	0.000537458	0.000633242	0.000573447	0.00703566	0.00204803	0.00813469	0.00253312
137	60S ribosomal protein L13	IPI00465361	24 kDa	12	18	8	7	64	41	53	63	0.0340928	0.0462214	0.0217835	0.0191786	0.180955	0.133729	0.153215	0.236629	0.00142054	0.00192589	0.000907647	0.000799109	0.00753977	0.00557205	0.00638394	0.00985953
138	Isoform Non-muscle of Myosin light polypeptide 6	IPI00335168	17 kDa	26	50	50	43	46	12	41	11	0.0738678	0.128393	0.136147	0.117811	0.130061	0.0391402	0.118525	0.0413161	0.00434517	0.00755252	0.00800865	0.00693009	0.00765065	0.00230237	0.00697203	0.00243036
139	Lipoma-preferred partner	IPI00023704	66 kDa	26	52	71	93	0	0	0	0	0.0738678	0.133528	0.193329	0.254802	0	0	0	0	0.00111921	0.00202316	0.00292922	0.00386063	0	0	0	0
140	60S ribosomal protein L18a	IPI00026202	21 kDa	14	9	10	10	64	63	65	33	0.039775	0.0231107	0.0272294	0.027398	0.180955	0.205486	0.187905	0.123948	0.00189405	0.00110051	0.00129664	0.00130467	0.00861688	0.00978505	0.00894784	0.0059023
141	Isoform 2 of KN motif and ankyrin repeat domain-containing protein 2	IPI00760962	92 kDa	32	63	58	93	0	1	1	0	0.0909143	0.161775	0.157931	0.254802	0	0.00326168	0.00289084	0	0.000988198	0.00175842	0.00171664	0.00276958	0	3.54531e-05	3.14222e-05	0
142	Isoform BMP1-3 of Bone morphogenetic protein 1	IPI00009054	111 kDa	28	41	16	28	37	42	28	35	0.07955	0.105282	0.0435671	0.0767144	0.104614	0.136991	0.0809436	0.13146	0.000716666	0.000948487	0.000392496	0.000691121	0.000942472	0.00123415	0.000729221	0.00118433
143	60S ribosomal protein L7a	IPI00299573	30 kDa	13	6	9	8	53	48	38	41	0.0369339	0.0154071	0.0245065	0.0219184	0.149853	0.156561	0.109852	0.153996	0.00123113	0.000513571	0.000816882	0.000730614	0.0049951	0.0052187	0.00366173	0.00513321
144	EH domain-containing protein 2	IPI00100980	61 kDa	3	5	2	4	75	4	126	7	0.00852321	0.0128393	0.00544588	0.0109592	0.212056	0.0130467	0.364246	0.0262921	0.000139725	0.00021048	8.92767e-05	0.000179659	0.00347633	0.000213881	0.00597125	0.000431017
145	Isoform 1 of Myosin-Ic	IPI00743335	122 kDa	16	18	6	25	44	9	83	43	0.0454571	0.0462214	0.0163376	0.068495	0.124406	0.0293552	0.23994	0.161508	0.000372599	0.000378864	0.000133915	0.000561435	0.00101972	0.000240616	0.00196672	0.00132384
146	Isoform 1 of Carboxypeptidase Z	IPI00396391	74 kDa	47	56	32	36	13	15	3	15	0.13353	0.1438	0.0871341	0.0986328	0.0367564	0.0489253	0.00867253	0.0563401	0.00180446	0.00194324	0.00117749	0.00133288	0.000496708	0.000661152	0.000117196	0.000761353
147	ubiquitin-like protein fubi and ribosomal protein S30 precursor	IPI00019770	14 kDa	24	30	21	29	6	14	3	6	0.0681857	0.0770357	0.0571818	0.0794542	0.0169645	0.0456636	0.00867253	0.0225361	0.00487041	0.00550255	0.00408441	0.0056753	0.00121175	0.00326168	0.000619466	0.00160972
148	60S ribosomal protein L18	IPI00215719	22 kDa	13	16	20	10	62	34	64	53	0.0369339	0.0410857	0.0544588	0.027398	0.1753	0.110897	0.185014	0.199069	0.00167881	0.00186753	0.0024754	0.00124536	0.00796817	0.00504079	0.00840972	0.00904857
149	Isoform 1 of Collagen alpha-1(IV) chain	IPI00743696	161 kDa	48	74	30	70	17	10	6	6	0.136371	0.190021	0.0816882	0.191786	0.048066	0.0326168	0.0173451	0.0225361	0.000847027	0.00118026	0.00050738	0.00119122	0.000298547	0.000202589	0.000107733	0.000139976
150	Integrin-linked protein kinase	IPI00013219	51 kDa	17	40	44	77	2	0	13	0	0.0482982	0.102714	0.119809	0.210965	0.00565483	0	0.0375809	0	0.000947024	0.002014	0.0023492	0.00413656	0.000110879	0	0.000736881	0
151	40S ribosomal protein S29	IPI00182289	7 kDa	62	33	41	27	22	24	21	12	0.176146	0.0847392	0.111641	0.0739746	0.0622031	0.0782804	0.0607077	0.0450721	0.0251638	0.0121056	0.0159487	0.0105678	0.00888616	0.0111829	0.00867253	0.00643887
152	Annexin A1	IPI00218918	39 kDa	39	54	36	49	16	3	45	3	0.110802	0.138664	0.0980259	0.13425	0.0452386	0.00978505	0.130088	0.011268	0.00284107	0.00355549	0.00251348	0.00344231	0.00115996	0.000250899	0.00333559	0.000288924
153	Latent-transforming growth factor beta-binding protein 2	IPI00292150	195 kDa	50	69	52	44	0	1	1	0	0.142054	0.177182	0.141593	0.120551	0	0.00326168	0.00289084	0	0.00072848	0.000908626	0.000726118	0.000618212	0	1.67266e-05	1.48248e-05	0
154	60S ribosomal protein L27a	IPI00456758	17 kDa	17	14	8	10	45	43	39	24	0.0482982	0.03595	0.0217835	0.027398	0.127234	0.140252	0.112743	0.0901442	0.00284107	0.0021147	0.00128138	0.00161165	0.00748433	0.00825014	0.00663193	0.0053026
155	Collagen alpha-2(V) chain	IPI00739099	145 kDa	43	43	36	39	18	2	31	2	0.122166	0.110418	0.0980259	0.106852	0.0508935	0.00652337	0.0896161	0.00751202	0.000842524	0.000761502	0.00067604	0.000736912	0.000350989	4.49888e-05	0.000618042	5.1807e-05
156	60S ribosomal protein L4	IPI00003918	48 kDa	1	4	4	4	50	28	58	43	0.00284107	0.0102714	0.0108918	0.0109592	0.141371	0.0913272	0.167669	0.161508	5.9189e-05	0.000213988	0.000226912	0.000228317	0.00294522	0.00190265	0.0034931	0.00336476
157	40S ribosomal protein S20	IPI00012493	13 kDa	26	24	24	26	19	22	19	19	0.0738678	0.0616285	0.0653506	0.0712348	0.0537209	0.0717571	0.054926	0.0713642	0.00568214	0.00474066	0.00502697	0.0054796	0.00413238	0.00551977	0.00422508	0.00548955
158	60S ribosomal protein L9	IPI00031691	22 kDa	23	31	18	33	12	27	22	17	0.0653446	0.0796035	0.0490129	0.0904134	0.033929	0.0880655	0.0635985	0.0638522	0.00297021	0.00361834	0.00222786	0.0041097	0.00154223	0.00400298	0.00289084	0.00290237
159	Testican-1	IPI00005292	49 kDa	0	0	0	0	69	78	66	47	0	0	0	0	0.195092	0.254411	0.190796	0.176532	0	0	0	0	0.00398146	0.00519207	0.00389379	0.0036027
160	Protein kinase C delta-binding protein	IPI00056334	28 kDa	53	28	44	23	27	26	21	22	0.150577	0.0719	0.119809	0.0630154	0.0763402	0.0848038	0.0607077	0.0826322	0.00537774	0.00256786	0.00427891	0.00225055	0.00272644	0.00302871	0.00216813	0.00295115
161	C-type lectin domain family 11 member A	IPI00033466	36 kDa	3	6	4	5	47	47	48	67	0.00852321	0.0154071	0.0108918	0.013699	0.132888	0.153299	0.13876	0.251653	0.000236756	0.000427976	0.000302549	0.000380528	0.00369135	0.00425831	0.00385446	0.00699035
162	Lysyl oxidase homolog 2	IPI00294839	87 kDa	20	61	28	32	5	14	5	20	0.0568214	0.156639	0.0762423	0.0876736	0.0141371	0.0456636	0.0144542	0.0751202	0.00065312	0.00180045	0.000876349	0.00100774	0.000162495	0.000524869	0.00016614	0.00086345
163	Isoform 1 of 40S ribosomal protein S24	IPI00029750	15 kDa	40	40	27	33	25	32	21	26	0.113643	0.102714	0.0735194	0.0904134	0.0706854	0.104374	0.0607077	0.0976562	0.00757619	0.00684761	0.00490129	0.00602756	0.00471236	0.00695826	0.00404718	0.00651042
164	60S ribosomal protein L8	IPI00012772	28 kDa	26	10	18	14	28	31	35	33	0.0738678	0.0256786	0.0490129	0.0383572	0.0791676	0.101112	0.101179	0.123948	0.00263814	0.000917091	0.00175046	0.0013699	0.00282741	0.00361115	0.00361355	0.00442673
165	Isoform 2 of Glia-derived nexin	IPI00914848	44 kDa	44	52	39	41	5	5	4	2	0.125007	0.133528	0.106195	0.112332	0.0141371	0.0163084	0.0115634	0.00751202	0.00284107	0.00303474	0.00241352	0.002553	0.000321297	0.000370646	0.000262804	0.000170728
166	Keratinocyte proline-rich protein	IPI00514908	64 kDa	7	10	26	10	13	19	35	6	0.0198875	0.0256786	0.0707965	0.027398	0.0367564	0.061972	0.101179	0.0225361	0.000310742	0.000401227	0.00110619	0.000428094	0.000574319	0.000968313	0.00158093	0.000352126
167	Isoform 1 of Slit homolog 2 protein	IPI00006288	170 kDa	34	78	23	47	0	0	0	0	0.0965964	0.200293	0.0626276	0.128771	0	0	0	0	0.000568214	0.00117819	0.000368398	0.000757474	0	0	0	0
168	40S ribosomal protein S7	IPI00013415	22 kDa	43	37	33	47	6	6	5	8	0.122166	0.0950107	0.089857	0.128771	0.0169645	0.0195701	0.0144542	0.0300481	0.005553	0.00431867	0.00408441	0.00585321	0.000771113	0.00088955	0.00065701	0.00136582
169	Isoform 1 of Clathrin heavy chain 1	IPI00024067	192 kDa	3	6	3	10	63	20	87	17	0.00852321	0.0154071	0.00816882	0.027398	0.178127	0.0652337	0.251503	0.0638522	4.43917e-05	8.02455e-05	4.25459e-05	0.000142698	0.000927745	0.000339759	0.00130991	0.000332563
170	Major vault protein	IPI00000105	99 kDa	6	6	1	6	43	20	60	45	0.0170464	0.0154071	0.00272294	0.0164388	0.121579	0.0652337	0.173451	0.16902	0.000172186	0.000155628	2.75045e-05	0.000166049	0.00122807	0.000658926	0.00175203	0.00170728
171	Hornerin	IPI00398625	282 kDa	3	11	12	25	32	30	26	40	0.00852321	0.0282464	0.0326753	0.068495	0.0904773	0.0978505	0.0751619	0.15024	3.02242e-05	0.000100165	0.00011587	0.00024289	0.000320841	0.000346988	0.000266532	0.000532767
172	Isoform 1 of Serum albumin	IPI00745872	69 kDa	204	225	194	182	2111	1953	1336	1817	0.579578	0.577768	0.528251	0.498644	5.96867	6.37007	3.86216	6.82467	0.00839969	0.00837344	0.0076558	0.00722672	0.0865025	0.0923199	0.0559734	0.0989083
173	Zyxin	IPI00926625	61 kDa	18	35	40	71	0	0	2	0	0.0511393	0.0898749	0.108918	0.194526	0	0	0.00578168	0	0.000838349	0.00147336	0.00178553	0.00318895	0	0	9.47817e-05	0
174	cDNA FLJ55486, highly similar to Semaphorin-3C	IPI00019209	87 kDa	39	38	20	26	5	9	2	5	0.110802	0.0975785	0.0544588	0.0712348	0.0141371	0.0293552	0.00578168	0.01878	0.00127358	0.00112159	0.000625963	0.000818791	0.000162495	0.000337416	6.64561e-05	0.000215863
175	Collagen alpha-1(V) chain	IPI00844090	184 kDa	22	25	18	21	24	7	31	6	0.0625036	0.0641964	0.0490129	0.0575358	0.067858	0.0228318	0.0896161	0.0225361	0.000339693	0.000348893	0.000266375	0.000312695	0.000368793	0.000124086	0.000487044	0.000122479
176	Tubulin beta-2C chain	IPI00007752	50 kDa	32	40	0	41	614	249	760	205	0.0909143	0.102714	0	0.112332	1.73603	0.81216	2.19704	0.769982	0.00181829	0.00205428	0	0.00224664	0.0347207	0.0162432	0.0439408	0.0153996
177	Isoform 2 of Transforming growth factor beta-1-induced transcript 1 protein	IPI00396399	48 kDa	24	56	59	91	1	0	1	0	0.0681857	0.1438	0.160654	0.249322	0.00282741	0	0.00289084	0	0.00142054	0.00299583	0.00334695	0.00519421	5.89045e-05	0	6.02259e-05	0
178	Filaggrin-2	IPI00397801	248 kDa	15	17	33	27	31	30	40	29	0.0426161	0.0436535	0.089857	0.0739746	0.0876499	0.0978505	0.115634	0.108924	0.000171839	0.000176022	0.000362327	0.000298285	0.000353427	0.000394559	0.000466265	0.000439211
179	Actin, alpha cardiac muscle 1	IPI00023006	42 kDa	79	149	113	147	402	86	425	117	0.224445	0.38261	0.307692	0.402751	1.13662	0.280505	1.22861	0.439453	0.00534392	0.00910977	0.00732601	0.0095893	0.0270624	0.00667869	0.0292526	0.0104632
180	40S ribosomal protein S15	IPI00479058	17 kDa	44	21	13	24	11	19	7	16	0.125007	0.053925	0.0353982	0.0657552	0.0311016	0.061972	0.0202359	0.0600962	0.00735336	0.00317206	0.00208225	0.00386795	0.0018295	0.00364541	0.00119035	0.00353507
181	Isoform 1 of 60S ribosomal protein L12	IPI00024933	18 kDa	21	24	18	18	29	33	27	25	0.0596625	0.0616285	0.0490129	0.0493164	0.081995	0.107636	0.0780527	0.0939002	0.00331458	0.00342381	0.00272294	0.0027398	0.00455528	0.00597976	0.00433626	0.00521668
182	Isoform 1 of Filamin-binding LIM protein 1	IPI00291238	41 kDa	19	38	52	62	0	0	0	0	0.0539803	0.0975785	0.141593	0.169868	0	0	0	0	0.00131659	0.00237996	0.00345349	0.00414311	0	0	0	0
183	40S ribosomal protein S27-like	IPI00746004	9 kDa	9	10	13	13	27	34	26	17	0.0255696	0.0256786	0.0353982	0.0356174	0.0763402	0.110897	0.0751619	0.0638522	0.00284107	0.00285317	0.00393314	0.00395749	0.00848224	0.0123219	0.00835132	0.00709468
184	Programmed cell death 6-interacting protein	IPI00246058	96 kDa	0	1	0	2	39	14	78	38	0	0.00256786	0	0.0054796	0.110269	0.0456636	0.225486	0.142728	0	2.67485e-05	0	5.70792e-05	0.00114864	0.000475662	0.00234881	0.00148675
185	40S ribosomal protein S5	IPI00008433	23 kDa	16	12	15	19	20	27	26	12	0.0454571	0.0308143	0.0408441	0.0520562	0.0565483	0.0880655	0.0751619	0.0450721	0.0019764	0.00133975	0.00177583	0.00226331	0.00245862	0.00382893	0.00326791	0.00195966
186	Ceruloplasmin	IPI00017601	122 kDa	0	0	0	0	94	1	63	11	0	0	0	0	0.265777	0.00326168	0.182123	0.0413161	0	0	0	0	0.0021785	2.67351e-05	0.00149281	0.000338657
187	Isoform 1 of Insulin-like growth factor II	IPI00001611	20 kDa	38	30	40	18	6	2	3	0	0.107961	0.0770357	0.108918	0.0493164	0.0169645	0.00652337	0.00867253	0	0.00539803	0.00385178	0.00544588	0.00246582	0.000848224	0.000326168	0.000433626	0
188	Histone H1.2	IPI00217465	21 kDa	32	24	27	33	15	11	12	16	0.0909143	0.0616285	0.0735194	0.0904134	0.0424112	0.0358785	0.0346901	0.0600962	0.00432925	0.00293469	0.00350092	0.0043054	0.00201958	0.0017085	0.00165191	0.00286172
189	60S ribosomal protein L6	IPI00329389	33 kDa	2	0	4	0	23	18	37	44	0.00568214	0	0.0108918	0	0.0650305	0.0587103	0.106961	0.165264	0.000172186	0	0.000330053	0	0.00197062	0.0017791	0.00324125	0.00500801
190	Isoform 2 of Growth arrest-specific protein 6	IPI00032532	75 kDa	17	32	18	24	21	17	27	20	0.0482982	0.0821714	0.0490129	0.0657552	0.0593757	0.0554486	0.0780527	0.0751202	0.000643976	0.00109562	0.000653506	0.000876736	0.000791676	0.000739315	0.0010407	0.0010016
191	Major histocompatibility complex, class I, A	IPI00647457	41 kDa	2	2	2	2	57	27	57	18	0.00568214	0.00513571	0.00544588	0.0054796	0.161163	0.0880655	0.164778	0.0676082	0.000138589	0.000125261	0.000132826	0.000133649	0.0039308	0.00214794	0.00401898	0.00164898
192	Isoform 1 of Coatomer subunit alpha	IPI00295857	138 kDa	0	0	0	0	41	30	59	9	0	0	0	0	0.115924	0.0978505	0.17056	0.0338041	0	0	0	0	0.000840029	0.000709062	0.00123594	0.000244957
193	Peroxiredoxin-1	IPI00000874	22 kDa	13	28	20	30	19	8	31	15	0.0369339	0.0719	0.0544588	0.082194	0.0537209	0.0260935	0.0896161	0.0563401	0.00167881	0.00326818	0.0024754	0.00373609	0.00244186	0.00118607	0.00407346	0.00256092
194	HSPA5 protein	IPI00003362	72 kDa	38	55	46	40	6	3	5	4	0.107961	0.141232	0.125255	0.109592	0.0169645	0.00978505	0.0144542	0.015024	0.00149945	0.00196156	0.00173966	0.00152211	0.000235618	0.000135904	0.000200753	0.000208667
195	Sushi repeat-containing protein SRPX2	IPI00004446	53 kDa	2	5	2	5	34	51	9	34	0.00568214	0.0128393	0.00544588	0.013699	0.0961321	0.166346	0.0260176	0.127704	0.00010721	0.000242251	0.000102752	0.000258472	0.00181381	0.0031386	0.000490898	0.00240952
196	60S ribosomal protein L36a-like	IPI00056494	12 kDa	11	12	13	7	12	24	9	6	0.0312518	0.0308143	0.0353982	0.0191786	0.033929	0.0782804	0.0260176	0.0225361	0.00260431	0.00256786	0.00294985	0.00159822	0.00282741	0.00652337	0.00216813	0.001878
197	Isoform 2 of Tropomyosin beta chain	IPI00220709	33 kDa	1	5	9	11	54	2	48	6	0.00284107	0.0128393	0.0245065	0.0301378	0.15268	0.00652337	0.13876	0.0225361	8.6093e-05	0.000389069	0.00074262	0.000913267	0.00462668	0.000197678	0.00420486	0.000682911
198	cDNA FLJ52712, highly similar to Tubulin beta-6 chain	IPI00908469	47 kDa	26	25	32	22	324	139	384	109	0.0738678	0.0641964	0.0871341	0.0602756	0.916082	0.453374	1.11008	0.409405	0.00157166	0.00136588	0.00185392	0.00128246	0.0194911	0.00964626	0.0236188	0.00871075
199	Isoform 1 of Cysteine-rich secretory protein LCCL domain-containing 2	IPI00027821	56 kDa	28	48	21	29	3	8	4	7	0.07955	0.123257	0.0571818	0.0794542	0.00848224	0.0260935	0.0115634	0.0262921	0.00142054	0.00220102	0.0010211	0.00141883	0.000151469	0.000465955	0.000206489	0.000469501
200	60S ribosomal protein L36	IPI00216237	12 kDa	10	2	8	5	31	30	22	13	0.0284107	0.00513571	0.0217835	0.013699	0.0876499	0.0978505	0.0635985	0.0488281	0.00236756	0.000427976	0.00181529	0.00114158	0.00730415	0.00815421	0.00529988	0.00406901
201	Keratin, type I cytoskeletal 18	IPI00554788	48 kDa	45	48	49	52	24	29	22	27	0.127848	0.123257	0.133424	0.14247	0.067858	0.0945889	0.0635985	0.101412	0.0026635	0.00256786	0.00277967	0.00296812	0.00141371	0.0019706	0.00132497	0.00211276
202	Insulin-like growth factor-binding protein 3	IPI00018305	32 kDa	35	31	20	27	5	0	4	0	0.0994375	0.0796035	0.0544588	0.0739746	0.0141371	0	0.0115634	0	0.00310742	0.00248761	0.00170184	0.00231171	0.000441784	0	0.000361355	0
203	polydom	IPI00301288	390 kDa	41	31	46	46	0	0	0	0	0.116484	0.0796035	0.125255	0.126031	0	0	0	0	0.000298677	0.000204112	0.000321167	0.000323156	0	0	0	0
204	60S ribosomal protein L29	IPI00419919	18 kDa	14	23	20	19	22	26	16	20	0.039775	0.0590607	0.0544588	0.0520562	0.0622031	0.0848038	0.0462535	0.0751202	0.00220972	0.00328115	0.00302549	0.00289201	0.00345573	0.00471132	0.00256964	0.00417334
205	Isoform M2 of Pyruvate kinase isozymes M1/M2	IPI00479186	58 kDa	24	21	20	21	12	2	23	5	0.0681857	0.053925	0.0544588	0.0575358	0.033929	0.00652337	0.0664894	0.01878	0.00117562	0.000929741	0.000938945	0.000991997	0.000584982	0.000112472	0.00114637	0.000323794
206	60S ribosomal protein L37a	IPI00414860	10 kDa	29	10	7	13	16	18	15	17	0.082391	0.0256786	0.0190606	0.0356174	0.0452386	0.0587103	0.0433626	0.0638522	0.0082391	0.00256786	0.00190606	0.00356174	0.00452386	0.00587103	0.00433626	0.00638522
207	Isoform 6 of cAMP-specific 3',5'-cyclic phosphodiesterase 4D	IPI00375236	84 kDa	4	3	2	0	2	2	2	4	0.0113643	0.00770357	0.00544588	0	0.00565483	0.00652337	0.00578168	0.015024	0.000135289	9.17091e-05	6.48319e-05	0	6.73194e-05	7.76592e-05	6.88296e-05	0.000178858
208	Peptidyl-prolyl cis-trans isomerase A	IPI00419585	18 kDa	13	25	19	27	9	6	18	3	0.0369339	0.0641964	0.0517359	0.0739746	0.0254467	0.0195701	0.0520352	0.011268	0.00205188	0.00356647	0.00287422	0.0041097	0.00141371	0.00108723	0.00289084	0.000626002
209	Isoform V1 of Versican core protein	IPI00215628	265 kDa	28	38	27	23	3	10	2	13	0.07955	0.0975785	0.0735194	0.0630154	0.00848224	0.0326168	0.00578168	0.0488281	0.000300189	0.000368221	0.000277432	0.000237794	3.20085e-05	0.000123082	2.18177e-05	0.000184257
210	Interferon-induced transmembrane protein 3	IPI00303726	15 kDa	0	0	0	0	63	11	100	13	0	0	0	0	0.178127	0.0358785	0.289084	0.0488281	0	0	0	0	0.0118751	0.0023919	0.0192723	0.00325521
211	Isoform 2 of Heparin-binding growth factor 2	IPI00154603	23 kDa	17	25	12	21	12	24	12	11	0.0482982	0.0641964	0.0326753	0.0575358	0.033929	0.0782804	0.0346901	0.0413161	0.00209992	0.00279115	0.00142066	0.00250156	0.00147517	0.0034035	0.00150827	0.00179635
212	leucine rich repeat containing 15 isoform a	IPI00913924	65 kDa	0	0	0	0	63	15	60	21	0	0	0	0	0.178127	0.0489253	0.173451	0.0788762	0	0	0	0	0.00274042	0.000752697	0.00266847	0.00121348
213	Matrix metalloproteinase-14	IPI00218398	66 kDa	3	1	1	3	47	10	54	11	0.00852321	0.00256786	0.00272294	0.0082194	0.132888	0.0326168	0.156105	0.0413161	0.00012914	3.89069e-05	4.12567e-05	0.000124536	0.00201346	0.000494195	0.00236523	0.000626002
214	60S ribosomal protein L30	IPI00219156	13 kDa	16	17	16	11	21	24	32	16	0.0454571	0.0436535	0.0435671	0.0301378	0.0593757	0.0782804	0.0925069	0.0600962	0.0034967	0.00335796	0.00335131	0.00231829	0.00456736	0.00602157	0.00711592	0.00462278
215	60S ribosomal protein L15	IPI00470528	24 kDa	6	2	6	4	26	25	26	20	0.0170464	0.00513571	0.0163376	0.0109592	0.0735128	0.0815421	0.0751619	0.0751202	0.000710268	0.000213988	0.000680735	0.000456634	0.00306303	0.00339759	0.00313175	0.00313001
216	312 kDa protein	IPI00945229	312 kDa	0	0	0	0	66	1	66	0	0	0	0	0	0.186609	0.00326168	0.190796	0	0	0	0	0	0.000598107	1.04541e-05	0.000611524	0
217	Mannosyl-oligosaccharide glucosidase	IPI00328170	92 kDa	32	18	28	22	1	5	1	7	0.0909143	0.0462214	0.0762423	0.0602756	0.00282741	0.0163084	0.00289084	0.0262921	0.000988198	0.000502407	0.000828721	0.00065517	3.07328e-05	0.000177265	3.14222e-05	0.000285783
218	26S proteasome non-ATPase regulatory subunit 2	IPI00012268	100 kDa	0	0	0	0	39	22	59	18	0	0	0	0	0.110269	0.0717571	0.17056	0.0676082	0	0	0	0	0.00110269	0.000717571	0.0017056	0.000676082
219	FHL2 isoform 5	IPI00396967	44 kDa	16	23	41	52	2	0	4	0	0.0454571	0.0590607	0.111641	0.14247	0.00565483	0	0.0115634	0	0.00103312	0.00134229	0.00253729	0.00323795	0.000128519	0	0.000262804	0
220	Heterogeneous nuclear ribonucleoprotein G	IPI00304692	42 kDa	7	18	4	18	2	31	1	39	0.0198875	0.0462214	0.0108918	0.0493164	0.00565483	0.101112	0.00289084	0.146484	0.000473512	0.00110051	0.000259328	0.0011742	0.000134639	0.00240743	6.88296e-05	0.00348772
221	Isoform Beta of Paxillin	IPI00335634	65 kDa	10	29	29	60	0	0	0	0	0.0284107	0.0744678	0.0789653	0.164388	0	0	0	0	0.000437088	0.00114566	0.00121485	0.00252905	0	0	0	0
222	Moesin	IPI00219365	68 kDa	21	27	20	24	6	3	10	1	0.0596625	0.0693321	0.0544588	0.0657552	0.0169645	0.00978505	0.0289084	0.00375601	0.000877389	0.00101959	0.000800865	0.000966989	0.000249478	0.000143898	0.000425124	5.52354e-05
223	Isoform 1 of Thrombospondin type-1 domain-containing protein 4	IPI00794391	112 kDa	28	49	17	34	2	2	1	1	0.07955	0.125825	0.04629	0.0931532	0.00565483	0.00652337	0.00289084	0.00375601	0.000710268	0.00112344	0.000413304	0.000831725	5.04895e-05	5.82444e-05	2.58111e-05	3.35358e-05
224	Growth/differentiation factor 15	IPI00306543	34 kDa	11	12	6	8	15	11	18	9	0.0312518	0.0308143	0.0163376	0.0219184	0.0424112	0.0358785	0.0520352	0.0338041	0.00091917	0.000906302	0.000480519	0.000644659	0.00124739	0.00105525	0.00153045	0.000994238
225	Utrophin	IPI00009329	394 kDa	13	39	23	42	0	1	0	0	0.0369339	0.100146	0.0626276	0.115072	0	0.00326168	0	0	9.37409e-05	0.000254179	0.000158953	0.00029206	0	8.27839e-06	0	0
226	Tumor necrosis factor receptor superfamily member 11B	IPI00298362	46 kDa	17	34	13	22	5	15	6	17	0.0482982	0.0873071	0.0353982	0.0602756	0.0141371	0.0489253	0.0173451	0.0638522	0.00104996	0.00189798	0.000769527	0.00131034	0.000307328	0.00106359	0.000377066	0.00138809
227	Importin subunit beta-1	IPI00001639	97 kDa	0	1	0	0	37	9	54	16	0	0.00256786	0	0	0.104614	0.0293552	0.156105	0.0600962	0	2.64727e-05	0	0	0.0010785	0.000302631	0.00160933	0.000619548
228	60S ribosomal protein L10a	IPI00412579	25 kDa	4	4	1	1	30	25	25	25	0.0113643	0.0102714	0.00272294	0.0027398	0.0848224	0.0815421	0.072271	0.0939002	0.000454571	0.000410857	0.000108918	0.000109592	0.0033929	0.00326168	0.00289084	0.00375601
229	Isoform 1 of Alpha-parvin	IPI00018963	42 kDa	8	32	29	54	1	1	2	0	0.0227286	0.0821714	0.0789653	0.147949	0.00282741	0.00326168	0.00578168	0	0.000541156	0.00195646	0.00188013	0.0035226	6.73194e-05	7.76592e-05	0.000137659	0
230	Tyrosine-protein kinase SgK269	IPI00737545	193 kDa	19	34	26	40	0	0	0	0	0.0539803	0.0873071	0.0707965	0.109592	0	0	0	0	0.000279691	0.000452368	0.000366821	0.000567834	0	0	0	0
231	60S ribosomal protein L22	IPI00219153	15 kDa	11	26	12	14	16	15	25	15	0.0312518	0.0667642	0.0326753	0.0383572	0.0452386	0.0489253	0.072271	0.0563401	0.00208345	0.00445095	0.00217835	0.00255715	0.00301591	0.00326168	0.00481807	0.00375601
232	Isoform 1 of Caldesmon	IPI00014516	93 kDa	16	29	28	37	2	2	5	0	0.0454571	0.0744678	0.0762423	0.101373	0.00565483	0.00652337	0.0144542	0	0.000488786	0.000800729	0.00081981	0.00109003	6.08046e-05	7.01438e-05	0.000155422	0
233	Isoform 1 of Keratin, type I cytoskeletal 13	IPI00009866	50 kDa	66	152	99	89	81	86	77	79	0.187511	0.390314	0.269571	0.243842	0.229021	0.280505	0.222595	0.296725	0.00375021	0.00780628	0.00539142	0.00487685	0.00458041	0.0056101	0.0044519	0.0059345
234	Collagen alpha-1(XV) chain	IPI00295414	142 kDa	15	9	10	4	29	22	28	13	0.0426161	0.0231107	0.0272294	0.0109592	0.081995	0.0717571	0.0809436	0.0488281	0.000300113	0.000162751	0.000191756	7.71775e-05	0.00057743	0.000505331	0.000570025	0.00034386
235	60S ribosomal protein L38	IPI00215790	8 kDa	20	29	15	21	7	9	10	10	0.0568214	0.0744678	0.0408441	0.0575358	0.0197919	0.0293552	0.0289084	0.0375601	0.00710268	0.00930848	0.00510551	0.00719198	0.00247399	0.0036694	0.00361355	0.00469501
236	Isoform Short of Heterogeneous nuclear ribonucleoprotein U	IPI00479217	89 kDa	13	27	3	24	3	15	6	17	0.0369339	0.0693321	0.00816882	0.0657552	0.00848224	0.0489253	0.0173451	0.0638522	0.000414988	0.000779012	9.17845e-05	0.000738823	9.53061e-05	0.000549722	0.000194888	0.00071744
237	40S ribosomal protein S6	IPI00021840	29 kDa	2	3	2	1	26	13	36	12	0.00568214	0.00770357	0.00544588	0.0027398	0.0735128	0.0424019	0.10407	0.0450721	0.000195936	0.00026564	0.000187789	9.44759e-05	0.00253492	0.00146213	0.00358863	0.00155421
238	60S ribosomal protein L34	IPI00219160	13 kDa	12	6	6	3	17	20	12	11	0.0340928	0.0154071	0.0163376	0.0082194	0.048066	0.0652337	0.0346901	0.0413161	0.00262253	0.00118516	0.00125674	0.000632262	0.00369739	0.00501798	0.00266847	0.00317816
239	cDNA FLJ45706 fis, clone FEBRA2028457, highly similar to Nucleolin	IPI00444262	66 kDa	0	1	1	0	40	16	40	11	0	0.00256786	0.00272294	0	0.113097	0.052187	0.115634	0.0413161	0	3.89069e-05	4.12567e-05	0	0.00171358	0.000790712	0.00175203	0.000626002
240	Isoform 1 of Testin	IPI00024097	48 kDa	8	18	36	58	0	0	0	0	0.0227286	0.0462214	0.0980259	0.158908	0	0	0	0	0.000473512	0.000962946	0.00204221	0.00331059	0	0	0	0
241	A disintegrin and metalloproteinase with thrombospondin motifs 4	IPI00307276	90 kDa	13	24	11	14	15	15	24	14	0.0369339	0.0616285	0.0299523	0.0383572	0.0424112	0.0489253	0.0693802	0.0525841	0.000410377	0.000684761	0.000332804	0.000426191	0.000471236	0.000543614	0.000770891	0.000584268
242	60S acidic ribosomal protein P0	IPI00008530	34 kDa	0	0	0	1	28	23	33	12	0	0	0	0.0027398	0.0791676	0.0750188	0.0953978	0.0450721	0	0	0	8.05824e-05	0.00232846	0.00220643	0.00280582	0.00132565
243	Ribosomal protein L14 variant	IPI00555744	24 kDa	6	5	5	3	34	14	30	13	0.0170464	0.0128393	0.0136147	0.0082194	0.0961321	0.0456636	0.0867253	0.0488281	0.000710268	0.00053497	0.000567279	0.000342475	0.0040055	0.00190265	0.00361355	0.00203451
244	Isoform 1 of Semaphorin-3B	IPI00012283	83 kDa	29	22	8	11	13	9	9	11	0.082391	0.0564928	0.0217835	0.0301378	0.0367564	0.0293552	0.0260176	0.0413161	0.000992663	0.000680636	0.000262452	0.000363106	0.000442848	0.000353677	0.000313465	0.000497784
245	60S ribosomal protein L35a	IPI00029731	13 kDa	4	2	4	3	11	11	15	10	0.0113643	0.00513571	0.0108918	0.0082194	0.0311016	0.0358785	0.0433626	0.0375601	0.000874176	0.000395055	0.000837828	0.000632262	0.00239243	0.00275989	0.00333559	0.00288924
246	Laminin subunit beta-2	IPI00296922	196 kDa	24	21	26	17	17	5	33	12	0.0681857	0.053925	0.0707965	0.0465766	0.048066	0.0163084	0.0953978	0.0450721	0.000347886	0.000275127	0.000361206	0.000237636	0.000245235	8.32062e-05	0.000486723	0.00022996
247	cDNA FLJ56389, highly similar to Elongation factor 1-gamma	IPI00000875	56 kDa	6	1	6	3	29	0	46	4	0.0170464	0.00256786	0.0163376	0.0082194	0.081995	0	0.132979	0.015024	0.0003044	4.58546e-05	0.000291744	0.000146775	0.0014642	0	0.00237462	0.000268286
248	Isoform 1 of Gremlin-1	IPI00298476	21 kDa	14	32	9	7	5	24	7	4	0.039775	0.0821714	0.0245065	0.0191786	0.0141371	0.0782804	0.0202359	0.015024	0.00189405	0.00391292	0.00116697	0.000913267	0.000673194	0.00372764	0.000963614	0.00071543
249	Dermcidin	IPI00027547	11 kDa	11	9	12	15	17	17	13	15	0.0312518	0.0231107	0.0326753	0.041097	0.048066	0.0554486	0.0375809	0.0563401	0.00284107	0.00210097	0.00297048	0.00373609	0.00436964	0.00504079	0.00341645	0.00512183
250	Dickkopf-related protein 1	IPI00016353	29 kDa	33	27	17	19	0	1	0	0	0.0937553	0.0693321	0.04629	0.0520562	0	0.00326168	0	0	0.00323294	0.00239076	0.00159621	0.00179504	0	0.000112472	0	0
251	Angiopoietin-related protein 2	IPI00007800	57 kDa	31	22	25	12	4	0	9	0	0.0880732	0.0564928	0.0680735	0.0328776	0.0113097	0	0.0260176	0	0.00154514	0.000991102	0.00119427	0.0005768	0.000198415	0	0.000456449	0
252	Inactive carboxypeptidase-like protein X2	IPI00296558	86 kDa	25	46	20	36	0	6	0	0	0.0710268	0.118121	0.0544588	0.0986328	0	0.0195701	0	0	0.000825893	0.0013735	0.000633242	0.00114689	0	0.000227559	0	0
253	Coatomer subunit gamma	IPI00783982	98 kDa	0	0	0	0	34	19	47	11	0	0	0	0	0.0961321	0.061972	0.13587	0.0413161	0	0	0	0	0.00098094	0.000632367	0.00138642	0.000421593
254	Serpin H1	IPI00032140	46 kDa	16	26	22	30	4	5	11	2	0.0454571	0.0667642	0.0599047	0.082194	0.0113097	0.0163084	0.0317993	0.00751202	0.000988198	0.0014514	0.00130228	0.00178683	0.000245862	0.000354531	0.000691288	0.000163305
255	Protein S100-A6	IPI00027463	10 kDa	11	7	5	11	9	9	11	31	0.0312518	0.017975	0.0136147	0.0301378	0.0254467	0.0293552	0.0317993	0.116436	0.00312518	0.0017975	0.00136147	0.00301378	0.00254467	0.00293552	0.00317993	0.0116436
256	Scavenger receptor cysteine-rich domain-containing protein LOC284297	IPI00554474	116 kDa	21	28	12	26	5	12	5	9	0.0596625	0.0719	0.0326753	0.0712348	0.0141371	0.0391402	0.0144542	0.0338041	0.000514332	0.000619827	0.000281684	0.000614093	0.000121871	0.000337416	0.000124605	0.000291415
257	60S ribosomal protein L28	IPI00182533	16 kDa	2	2	1	3	24	12	18	7	0.00568214	0.00513571	0.00272294	0.0082194	0.067858	0.0391402	0.0520352	0.0262921	0.000355134	0.000320982	0.000170184	0.000513713	0.00424112	0.00244626	0.0032522	0.00164325
258	Heat shock 70 kDa protein 1A/1B	IPI00304925	70 kDa	25	30	23	38	7	7	16	23	0.0710268	0.0770357	0.0626276	0.104112	0.0197919	0.0228318	0.0462535	0.0863882	0.00101467	0.00110051	0.000894681	0.00148732	0.000282741	0.000326168	0.000660764	0.00123412
259	Isoform 2 of Microtubule-actin cross-linking factor 1, isoforms 1/2/3/5	IPI00256861	620 kDa	9	23	17	56	0	0	0	0	0.0255696	0.0590607	0.04629	0.153429	0	0	0	0	4.12413e-05	9.52592e-05	7.46613e-05	0.000247466	0	0	0	0
260	Myosin regulatory light chain 12B	IPI00033494	20 kDa	6	18	21	14	24	3	15	5	0.0170464	0.0462214	0.0571818	0.0383572	0.067858	0.00978505	0.0433626	0.01878	0.000852321	0.00231107	0.00285909	0.00191786	0.0033929	0.000489253	0.00216813	0.000939002
261	Tubulin alpha-1C chain	IPI00218343	50 kDa	10	14	0	0	358	165	439	141	0.0284107	0.03595	0	0	1.01221	0.538178	1.26908	0.529597	0.000568214	0.000719	0	0	0.0202443	0.0107636	0.0253816	0.0105919
262	Isoform 1 of Collagen alpha-1(XVI) chain	IPI00400935	158 kDa	42	16	38	15	1	0	2	0	0.119325	0.0410857	0.103472	0.041097	0.00282741	0	0.00578168	0	0.000755221	0.000260036	0.000654884	0.000260108	1.7895e-05	0	3.65929e-05	0
263	cDNA FLJ55165, highly similar to Particularly interesting new Cys-His protein	IPI00847665	44 kDa	6	22	17	50	0	0	0	1	0.0170464	0.0564928	0.04629	0.13699	0	0	0	0.00375601	0.000387419	0.00128393	0.00105205	0.00311341	0	0	0	8.53639e-05
264	Extracellular superoxide dismutase [Cu-Zn]	IPI00027827	26 kDa	2	1	2	1	36	21	29	20	0.00568214	0.00256786	0.00544588	0.0027398	0.101787	0.0684954	0.0838344	0.0751202	0.000218544	9.87637e-05	0.000209457	0.000105377	0.00391488	0.00263444	0.0032244	0.00288924
265	Protein S100-A8	IPI00007047	11 kDa	7	16	16	16	16	12	19	13	0.0198875	0.0410857	0.0435671	0.0438368	0.0452386	0.0391402	0.054926	0.0488281	0.00180795	0.00373506	0.00396064	0.00398517	0.0041126	0.0035582	0.00499327	0.00443892
266	Histone H1.5	IPI00217468	23 kDa	22	18	14	29	4	4	3	9	0.0625036	0.0462214	0.0381212	0.0794542	0.0113097	0.0130467	0.00867253	0.0338041	0.00271755	0.00200963	0.00165744	0.00345453	0.000491724	0.00056725	0.000377066	0.00146974
267	Microfibrillar-associated protein 2	IPI00022621	21 kDa	2	6	4	1	25	16	24	8	0.00568214	0.0154071	0.0108918	0.0027398	0.0706854	0.052187	0.0693802	0.0300481	0.000270578	0.000733673	0.000518655	0.000130467	0.00336597	0.00248509	0.00330382	0.00143086
268	Thyroid receptor-interacting protein 6	IPI00301561	50 kDa	6	16	22	42	0	0	0	0	0.0170464	0.0410857	0.0599047	0.115072	0	0	0	0	0.000340928	0.000821714	0.00119809	0.00230143	0	0	0	0
269	Erythrocyte band 7 integral membrane protein	IPI00219682	32 kDa	2	5	2	3	34	7	46	10	0.00568214	0.0128393	0.00544588	0.0082194	0.0961321	0.0228318	0.132979	0.0375601	0.000177567	0.000401227	0.000170184	0.000256856	0.00300413	0.000713494	0.00415559	0.00117375
270	Isoform C1 of Heterogeneous nuclear ribonucleoproteins C1/C2	IPI00216592	32 kDa	8	14	5	5	18	4	28	6	0.0227286	0.03595	0.0136147	0.013699	0.0508935	0.0130467	0.0809436	0.0225361	0.000710268	0.00112344	0.000425459	0.000428094	0.00159042	0.000407711	0.00252949	0.000704252
271	Prolactin-inducible protein	IPI00022974	17 kDa	0	47	0	20	0	26	1	16	0	0.120689	0	0.054796	0	0.0848038	0.00289084	0.0600962	0	0.00709937	0	0.0032233	0	0.00498846	0.00017005	0.00353507
272	Tubulin beta-3 chain	IPI00013683	50 kDa	26	26	0	23	434	175	522	151	0.0738678	0.0667642	0	0.0630154	1.2271	0.570795	1.50902	0.567157	0.00147736	0.00133528	0	0.00126031	0.024542	0.0114159	0.0301804	0.0113431
273	rRNA 2'-O-methyltransferase fibrillarin	IPI00025039	34 kDa	18	14	9	17	2	7	3	10	0.0511393	0.03595	0.0245065	0.0465766	0.00565483	0.0228318	0.00867253	0.0375601	0.0015041	0.00105735	0.000720778	0.0013699	0.000166319	0.000671523	0.000255074	0.00110471
274	Nucleolar protein 16	IPI00032849	21 kDa	12	22	11	16	5	14	2	3	0.0340928	0.0564928	0.0299523	0.0438368	0.0141371	0.0456636	0.00578168	0.011268	0.00162347	0.00269013	0.0014263	0.00208747	0.000673194	0.00217446	0.000275318	0.000536573
275	26S protease regulatory subunit 7	IPI00021435	49 kDa	1	0	0	0	29	16	41	18	0.00284107	0	0	0	0.081995	0.052187	0.118525	0.0676082	5.7981e-05	0	0	0	0.00167337	0.00106504	0.00241887	0.00137976
276	Isoform 1 of Slit homolog 3 protein	IPI00017640	168 kDa	31	31	12	12	0	0	0	0	0.0880732	0.0796035	0.0326753	0.0328776	0	0	0	0	0.000524245	0.00047383	0.000194496	0.0001957	0	0	0	0
277	Isoform 1 of Extracellular sulfatase Sulf-2	IPI00297252	100 kDa	3	4	1	1	23	20	15	16	0.00852321	0.0102714	0.00272294	0.0027398	0.0650305	0.0652337	0.0433626	0.0600962	8.52321e-05	0.000102714	2.72294e-05	2.7398e-05	0.000650305	0.000652337	0.000433626	0.000600962
278	Angiopoietin-related protein 4	IPI00153060	45 kDa	4	0	1	0	35	2	32	2	0.0113643	0	0.00272294	0	0.0989595	0.00652337	0.0925069	0.00751202	0.00025254	0	6.05098e-05	0	0.0021991	0.000144964	0.00205571	0.000166934
279	Cystatin-S	IPI00032294	16 kDa	0	66	0	8	0	27	0	3	0	0.169478	0	0.0219184	0	0.0880655	0	0.011268	0	0.0105924	0	0.0013699	0	0.00550409	0	0.000704252
280	Isoform 1 of Sharpin	IPI00873534	40 kDa	0	0	0	0	0	0	0	84	0	0	0	0	0	0	0	0.315505	0	0	0	0	0	0	0	0.00788762
281	Protein Wnt-5b	IPI00022223	40 kDa	24	40	17	23	18	46	12	38	0.0681857	0.102714	0.04629	0.0630154	0.0508935	0.150038	0.0346901	0.142728	0.00170464	0.00256786	0.00115725	0.00157539	0.00127234	0.00375094	0.000867253	0.00356821
282	33 kDa protein	IPI00413108	33 kDa	3	4	3	3	24	8	39	9	0.00852321	0.0102714	0.00816882	0.0082194	0.067858	0.0260935	0.112743	0.0338041	0.000258279	0.000311255	0.00024754	0.000249073	0.0020563	0.000790712	0.00341645	0.00102437
283	28S ribosomal protein S21, mitochondrial	IPI00014812	11 kDa	13	11	12	12	10	19	9	11	0.0369339	0.0282464	0.0326753	0.0328776	0.0282741	0.061972	0.0260176	0.0413161	0.00335763	0.00256786	0.00297048	0.00298887	0.00257038	0.00563382	0.00236523	0.00375601
284	Guanine nucleotide-binding protein subunit beta-2-like 1	IPI00848226	35 kDa	5	8	4	10	18	8	23	4	0.0142054	0.0205428	0.0108918	0.027398	0.0508935	0.0260935	0.0664894	0.015024	0.000405867	0.000586938	0.000311193	0.0007828	0.0014541	0.000745528	0.0018997	0.000429258
285	four and a half LIM domains 1 isoform 5	IPI00014398	34 kDa	2	7	16	46	2	1	5	0	0.00568214	0.017975	0.0435671	0.126031	0.00565483	0.00326168	0.0144542	0	0.000167122	0.000528676	0.00128138	0.00370679	0.000166319	9.59319e-05	0.000425124	0
286	Eukaryotic translation initiation factor 3 subunit A	IPI00029012	167 kDa	0	0	0	0	28	0	53	1	0	0	0	0	0.0791676	0	0.153215	0.00375601	0	0	0	0	0.000474058	0	0.000917453	2.24911e-05
287	Isoform A of Ras-related C3 botulinum toxin substrate 1	IPI00010271	21 kDa	8	14	7	6	10	8	12	10	0.0227286	0.03595	0.0190606	0.0164388	0.0282741	0.0260935	0.0346901	0.0375601	0.00108231	0.0017119	0.000907647	0.0007828	0.00134639	0.00124255	0.00165191	0.00178858
288	Tubulin beta-2A chain	IPI00013475	50 kDa	35	39	44	0	581	233	697	197	0.0994375	0.100146	0.119809	0	1.64273	0.759973	2.01492	0.739934	0.00198875	0.00200293	0.00239619	0	0.0328546	0.0151995	0.0402983	0.0147987
289	Lysozyme C	IPI00019038	17 kDa	3	20	9	11	10	15	12	11	0.00852321	0.0513571	0.0245065	0.0301378	0.0282741	0.0489253	0.0346901	0.0413161	0.000501365	0.00302101	0.00144156	0.00177281	0.00166319	0.00287796	0.00204059	0.00243036
290	40S ribosomal protein S4, Y isoform 1	IPI00302740	29 kDa	28	38	25	31	48	95	48	76	0.07955	0.0975785	0.0680735	0.0849338	0.135716	0.30986	0.13876	0.285457	0.0027431	0.00336478	0.00234736	0.00292875	0.00467986	0.0106848	0.00478484	0.00984334
291	14-3-3 protein epsilon	IPI00000816	29 kDa	3	5	8	8	34	2	20	4	0.00852321	0.0128393	0.0217835	0.0219184	0.0961321	0.00652337	0.0578168	0.015024	0.000293904	0.000442734	0.000751156	0.000755807	0.0033149	0.000224944	0.00199368	0.00051807
292	Chloride intracellular channel protein 1	IPI00010896	27 kDa	5	5	5	6	23	7	23	7	0.0142054	0.0128393	0.0136147	0.0164388	0.0650305	0.0228318	0.0664894	0.0262921	0.000526124	0.000475529	0.000504248	0.000608845	0.00240854	0.000845622	0.00246257	0.00097378
293	Keratin, type II cuticular Hb6	IPI00182655	53 kDa	0	7	11	4	12	32	11	3	0	0.017975	0.0299523	0.0109592	0.033929	0.104374	0.0317993	0.011268	0	0.000339151	0.000565139	0.000206777	0.000640169	0.00196932	0.000599986	0.000212604
294	Isoform 1 of Importin-5	IPI00793443	124 kDa	0	1	0	1	21	12	40	12	0	0.00256786	0	0.0027398	0.0593757	0.0391402	0.115634	0.0450721	0	2.07085e-05	0	2.20952e-05	0.000478836	0.000315647	0.00093253	0.000363485
295	Cystatin-SN	IPI00305477	16 kDa	0	81	0	0	0	11	0	0	0	0.207996	0	0	0	0.0358785	0	0	0	0.0129998	0	0	0	0.00224241	0	0
296	High mobility group protein B1	IPI00419258	25 kDa	2	1	0	1	23	3	29	5	0.00568214	0.00256786	0	0.0027398	0.0650305	0.00978505	0.0838344	0.01878	0.000227286	0.000102714	0	0.000109592	0.00260122	0.000391402	0.00335338	0.000751202
297	Uveal autoantigen with coiled-coil domains and ankyrin repeats	IPI00173359	163 kDa	8	19	16	22	0	0	0	0	0.0227286	0.0487893	0.0435671	0.0602756	0	0	0	0	0.000139439	0.000299321	0.000267283	0.000369789	0	0	0	0
298	Isoform 1 of Collagen triple helix repeat-containing protein 1	IPI00060423	26 kDa	10	23	6	14	4	3	3	5	0.0284107	0.0590607	0.0163376	0.0383572	0.0113097	0.00978505	0.00867253	0.01878	0.00109272	0.00227156	0.000628371	0.00147528	0.000434987	0.000376348	0.000333559	0.00072231
299	Isoform 1 of Guanine nucleotide-binding protein G(i) subunit alpha-2	IPI00748145	40 kDa	3	1	2	2	19	5	31	12	0.00852321	0.00256786	0.00544588	0.0054796	0.0537209	0.0163084	0.0896161	0.0450721	0.00021308	6.41964e-05	0.000136147	0.00013699	0.00134302	0.000407711	0.0022404	0.0011268
300	Isoform 1 of Keratin, type II cytoskeletal 78	IPI00477227	57 kDa	16	18	25	20	18	21	15	17	0.0454571	0.0462214	0.0680735	0.054796	0.0508935	0.0684954	0.0433626	0.0638522	0.000797493	0.000810902	0.00119427	0.000961334	0.000892868	0.00120167	0.000760748	0.00112021
301	Isoform D of Fibulin-1	IPI00296534	77 kDa	20	12	20	16	0	0	0	0	0.0568214	0.0308143	0.0544588	0.0438368	0	0	0	0	0.00073794	0.000400185	0.000707257	0.000569309	0	0	0	0
302	NADH dehydrogenase [ubiquinone] 1 alpha subcomplex subunit 7	IPI00452731	13 kDa	15	5	9	17	7	9	5	10	0.0426161	0.0128393	0.0245065	0.0465766	0.0197919	0.0293552	0.0144542	0.0375601	0.00327816	0.000987637	0.00188511	0.00358282	0.00152245	0.00225809	0.00111186	0.00288924
303	Plasminogen activator inhibitor 1	IPI00007118	45 kDa	11	15	17	14	1	2	1	5	0.0312518	0.0385178	0.04629	0.0383572	0.00282741	0.00652337	0.00289084	0.01878	0.000694484	0.000855952	0.00102867	0.000852383	6.28314e-05	0.000144964	6.42409e-05	0.000417334
304	Rho-related GTP-binding protein RhoC	IPI00027434	22 kDa	11	6	6	4	11	6	13	4	0.0312518	0.0154071	0.0163376	0.0109592	0.0311016	0.0195701	0.0375809	0.015024	0.00142054	0.000700324	0.00074262	0.000498146	0.00141371	0.00088955	0.00170822	0.000682911
305	Isoform 1 of Cytoskeleton-associated protein 4	IPI00141318	66 kDa	15	16	21	18	5	3	4	2	0.0426161	0.0410857	0.0571818	0.0493164	0.0141371	0.00978505	0.0115634	0.00751202	0.000645698	0.00062251	0.00086639	0.000747218	0.000214198	0.000148258	0.000175203	0.000113818
306	keratin 77	IPI00376379	62 kDa	89	138	136	136	137	151	149	134	0.252855	0.354364	0.37032	0.372613	0.387356	0.492514	0.430735	0.503305	0.00407831	0.00571555	0.0059729	0.00600989	0.00624767	0.00794378	0.00694735	0.00811783
307	Skin-specific protein 32	IPI00023078	26 kDa	2	1	7	4	7	6	9	1	0.00568214	0.00256786	0.0190606	0.0109592	0.0197919	0.0195701	0.0260176	0.00375601	0.000218544	9.87637e-05	0.000733099	0.000421508	0.000761227	0.000752697	0.00100068	0.000144462
308	Heat shock protein beta-1	IPI00025512	23 kDa	11	5	9	4	9	4	22	12	0.0312518	0.0128393	0.0245065	0.0109592	0.0254467	0.0130467	0.0635985	0.0450721	0.00135877	0.000558229	0.0010655	0.000476487	0.00110638	0.00056725	0.00276515	0.00195966
309	Isoform 1 of Liprin-beta-1	IPI00397366	114 kDa	4	19	9	26	0	0	1	2	0.0113643	0.0487893	0.0245065	0.0712348	0	0	0.00289084	0.00751202	9.96867e-05	0.000427976	0.000214969	0.000624867	0	0	2.53583e-05	6.58949e-05
310	SRA stem-loop-interacting RNA-binding protein, mitochondrial	IPI00009922	12 kDa	5	4	6	7	11	14	6	9	0.0142054	0.0102714	0.0163376	0.0191786	0.0311016	0.0456636	0.0173451	0.0338041	0.00118378	0.000855952	0.00136147	0.00159822	0.0025918	0.0038053	0.00144542	0.00281701
311	26S proteasome non-ATPase regulatory subunit 3	IPI00011603	61 kDa	0	0	0	0	23	9	40	6	0	0	0	0	0.0650305	0.0293552	0.115634	0.0225361	0	0	0	0	0.00106607	0.000481232	0.00189563	0.000369444
312	Isoform 1 of Eukaryotic translation initiation factor 3 subunit B	IPI00396370	92 kDa	0	0	0	0	30	0	38	1	0	0	0	0	0.0848224	0	0.109852	0.00375601	0	0	0	0	0.000921983	0	0.00119404	4.08262e-05
313	Cartilage-associated protein	IPI00748502	47 kDa	0	1	2	2	15	6	19	5	0	0.00256786	0.00544588	0.0054796	0.0424112	0.0195701	0.054926	0.01878	0	5.46352e-05	0.00011587	0.000116587	0.000902366	0.000416385	0.00116864	0.000399575
314	Vasodilator-stimulated phosphoprotein	IPI00301058	40 kDa	8	9	21	26	0	0	3	0	0.0227286	0.0231107	0.0571818	0.0712348	0	0	0.00867253	0	0.000568214	0.000577768	0.00142954	0.00178087	0	0	0.000216813	0
315	Calreticulin	IPI00020599	48 kDa	0	0	0	0	20	0	26	1	0	0	0	0	0.0565483	0	0.0751619	0.00375601	0	0	0	0	0.00117809	0	0.00156587	7.82502e-05
316	Myeloid-associated differentiation marker	IPI00102685	35 kDa	2	6	3	3	8	19	13	15	0.00568214	0.0154071	0.00816882	0.0082194	0.0226193	0.061972	0.0375809	0.0563401	0.000162347	0.000440204	0.000233395	0.00023484	0.000646266	0.00177063	0.00107374	0.00160972
317	keratin 4	IPI00290078	64 kDa	33	67	35	50	41	44	0	41	0.0937553	0.172046	0.0953029	0.13699	0.115924	0.143514	0	0.153996	0.00146493	0.00268822	0.00148911	0.00214047	0.00181131	0.00224241	0	0.00240619
318	Ras-related protein Rap-1A	IPI00019345	21 kDa	7	13	19	15	3	1	8	0	0.0198875	0.0333821	0.0517359	0.041097	0.00848224	0.00326168	0.0231267	0	0.000947024	0.00158962	0.00246361	0.001957	0.000403916	0.000155318	0.00110127	0
319	Isoform 2 of Myosin light chain kinase, smooth muscle	IPI00221255	203 kDa	6	8	14	20	6	0	8	0	0.0170464	0.0205428	0.0381212	0.054796	0.0169645	0	0.0231267	0	8.39725e-05	0.000101196	0.000187789	0.000269931	8.35689e-05	0	0.000113925	0
320	GTP-binding nuclear protein Ran	IPI00643041	24 kDa	7	6	4	5	17	3	24	3	0.0198875	0.0154071	0.0108918	0.013699	0.048066	0.00978505	0.0693802	0.011268	0.000828646	0.000641964	0.000453823	0.000570792	0.00200275	0.000407711	0.00289084	0.000469501
321	Small nuclear ribonucleoprotein Sm D3	IPI00017964	14 kDa	2	3	2	1	13	8	20	6	0.00568214	0.00770357	0.00544588	0.0027398	0.0367564	0.0260935	0.0578168	0.0225361	0.000405867	0.000550255	0.000388992	0.0001957	0.00262546	0.00186382	0.00412977	0.00160972
322	Coatomer subunit beta'	IPI00220219	102 kDa	0	0	0	0	26	5	25	6	0	0	0	0	0.0735128	0.0163084	0.072271	0.0225361	0	0	0	0	0.000720714	0.000159887	0.00070854	0.000220942
323	Beta-actin-like protein 2	IPI00003269	42 kDa	15	60	27	33	118	33	180	25	0.0426161	0.154071	0.0735194	0.0904134	0.333635	0.107636	0.520352	0.0939002	0.00101467	0.00366837	0.00175046	0.0021527	0.00794369	0.00256275	0.0123893	0.00223572
324	Fibrinogen beta chain	IPI00298497	56 kDa	7	26	3	23	0	0	0	0	0.0198875	0.0667642	0.00816882	0.0630154	0	0	0	0	0.000355134	0.00119222	0.000145872	0.00112528	0	0	0	0
325	Eukaryotic initiation factor 4A-I	IPI00025491	46 kDa	1	6	1	4	23	2	27	7	0.00284107	0.0154071	0.00272294	0.0109592	0.0650305	0.00652337	0.0780527	0.0262921	6.17624e-05	0.000334938	5.91944e-05	0.000238244	0.00141371	0.000141812	0.0016968	0.000571567
326	Eukaryotic translation initiation factor 3 subunit E	IPI00013068	52 kDa	0	1	2	1	19	1	23	5	0	0.00256786	0.00544588	0.0027398	0.0537209	0.00326168	0.0664894	0.01878	0	4.93818e-05	0.000104728	5.26885e-05	0.00103309	6.27247e-05	0.00127864	0.000361155
327	Isoform 1 of Collagen alpha-1(XIV) chain	IPI00176193	194 kDa	27	3	26	1	8	0	4	1	0.0767089	0.00770357	0.0707965	0.0027398	0.0226193	0	0.0115634	0.00375601	0.000395407	3.97091e-05	0.00036493	1.41227e-05	0.000116594	0	5.9605e-05	1.93609e-05
328	Isoform Alpha of Vinexin	IPI00419847	75 kDa	4	17	17	21	0	0	0	0	0.0113643	0.0436535	0.04629	0.0575358	0	0	0	0	0.000151524	0.000582047	0.0006172	0.000767144	0	0	0	0
329	Coatomer subunit beta	IPI00295851	107 kDa	0	0	0	0	21	4	34	6	0	0	0	0	0.0593757	0.0130467	0.0982886	0.0225361	0	0	0	0	0.000554913	0.000121932	0.000918585	0.000210617
330	Serine protease 23	IPI00026941	43 kDa	9	13	9	12	2	3	7	4	0.0255696	0.0333821	0.0245065	0.0328776	0.00565483	0.00978505	0.0202359	0.015024	0.000594643	0.000776328	0.000569918	0.000764596	0.000131508	0.000227559	0.000470602	0.000349396
331	Proteasome subunit beta type-5	IPI00479306	28 kDa	0	1	0	0	35	4	29	8	0	0.00256786	0	0	0.0989595	0.0130467	0.0838344	0.0300481	0	9.17091e-05	0	0	0.00353427	0.000465955	0.00299409	0.00107315
332	Isoform 1 of Nucleophosmin	IPI00549248	33 kDa	2	0	1	0	16	19	13	15	0.00568214	0	0.00272294	0	0.0452386	0.061972	0.0375809	0.0563401	0.000172186	0	8.25134e-05	0	0.00137087	0.00187794	0.00113882	0.00170728
333	Isoform Gamma-B of Fibrinogen gamma chain	IPI00021891	52 kDa	6	26	2	18	0	0	0	0	0.0170464	0.0667642	0.00544588	0.0493164	0	0	0	0	0.000327816	0.00128393	0.000104728	0.000948393	0	0	0	0
334	Poly(rC)-binding protein 1	IPI00016610	37 kDa	6	6	5	11	13	7	18	7	0.0170464	0.0154071	0.0136147	0.0301378	0.0367564	0.0228318	0.0520352	0.0262921	0.000460714	0.000416409	0.000367965	0.000814535	0.000993416	0.000617076	0.00140636	0.000710596
335	Isoform B of AP-2 complex subunit alpha-1	IPI00256684	105 kDa	0	2	1	2	15	6	26	14	0	0.00513571	0.00272294	0.0054796	0.0424112	0.0195701	0.0751619	0.0525841	0	4.89115e-05	2.59328e-05	5.21867e-05	0.000403916	0.000186382	0.000715827	0.000500801
336	cDNA FLJ54488, highly similar to Eukaryotic translation initiation factor 3 subunit 8	IPI00922360	92 kDa	0	0	0	0	27	2	44	4	0	0	0	0	0.0763402	0.00652337	0.127197	0.015024	0	0	0	0	0.000829785	7.09062e-05	0.00138258	0.000163305
337	Isoform 3 of Prolyl 3-hydroxylase 1	IPI00045839	91 kDa	4	6	2	2	14	4	24	2	0.0113643	0.0154071	0.00544588	0.0054796	0.0395838	0.0130467	0.0693802	0.00751202	0.000124882	0.000169309	5.98449e-05	6.02154e-05	0.000434987	0.000143371	0.00076242	8.25497e-05
338	40S ribosomal protein S28	IPI00719622	8 kDa	7	5	5	10	1	7	2	14	0.0198875	0.0128393	0.0136147	0.027398	0.00282741	0.0228318	0.00578168	0.0525841	0.00248594	0.00160491	0.00170184	0.00342475	0.000353427	0.00285397	0.00072271	0.00657302
339	Isoform 1 of Tropomyosin alpha-4 chain	IPI00010779	29 kDa	0	6	9	14	47	3	45	4	0	0.0154071	0.0245065	0.0383572	0.132888	0.00978505	0.130088	0.015024	0	0.00053128	0.000845051	0.00132266	0.00458236	0.000337416	0.00448579	0.00051807
340	Isoform 1 of 28S ribosomal protein S11, mitochondrial	IPI00010244	21 kDa	7	11	13	12	5	6	5	7	0.0198875	0.0282464	0.0353982	0.0328776	0.0141371	0.0195701	0.0144542	0.0262921	0.000947024	0.00134507	0.00168563	0.0015656	0.000673194	0.00093191	0.000688296	0.001252
341	nascent polypeptide-associated complex alpha subunit isoform a	IPI00797126	95 kDa	9	14	12	14	10	4	9	5	0.0255696	0.03595	0.0326753	0.0383572	0.0282741	0.0130467	0.0260176	0.01878	0.000269154	0.000378421	0.00034395	0.00040376	0.000297623	0.000137334	0.000273869	0.000197685
342	40S ribosomal protein S10	IPI00008438	19 kDa	7	10	3	8	4	20	2	11	0.0198875	0.0256786	0.00816882	0.0219184	0.0113097	0.0652337	0.00578168	0.0413161	0.00104671	0.0013515	0.000429938	0.0011536	0.000595245	0.00343335	0.000304299	0.00217453
343	Keratin, type II cytoskeletal 7	IPI00306959	51 kDa	78	85	89	99	0	75	0	75	0.221604	0.218268	0.242342	0.27124	0	0.244626	0	0.281701	0.00434517	0.00427976	0.0047518	0.00531844	0	0.0047966	0	0.00552354
344	26S proteasome non-ATPase regulatory subunit 6	IPI00014151	46 kDa	0	0	0	0	20	11	21	13	0	0	0	0	0.0565483	0.0358785	0.0607077	0.0488281	0	0	0	0	0.00122931	0.000779968	0.00131973	0.00106148
345	Isoform 1 of Tubulointerstitial nephritis antigen-like	IPI00005563	52 kDa	5	17	10	10	7	7	8	6	0.0142054	0.0436535	0.0272294	0.027398	0.0197919	0.0228318	0.0231267	0.0225361	0.00027318	0.000839491	0.000523642	0.000526885	0.000380614	0.000439073	0.000444745	0.000433386
346	Isoform 1A of Desmocollin-1	IPI00216099	100 kDa	1	4	6	4	11	4	5	5	0.00284107	0.0102714	0.0163376	0.0109592	0.0311016	0.0130467	0.0144542	0.01878	2.84107e-05	0.000102714	0.000163376	0.000109592	0.000311016	0.000130467	0.000144542	0.0001878
347	Cytoplasmic dynein 1 heavy chain 1	IPI00456969	532 kDa	2	2	1	5	17	0	29	1	0.00568214	0.00513571	0.00272294	0.013699	0.048066	0	0.0838344	0.00375601	1.06807e-05	9.65359e-06	5.11831e-06	2.575e-05	9.03497e-05	0	0.000157583	7.06017e-06
348	14-3-3 protein zeta/delta	IPI00021263	28 kDa	7	10	11	15	28	1	17	6	0.0198875	0.0256786	0.0299523	0.041097	0.0791676	0.00326168	0.0491443	0.0225361	0.000710268	0.000917091	0.00106973	0.00146775	0.00282741	0.000116489	0.00175515	0.000804859
349	Isoform Long of Splicing factor, proline- and glutamine-rich	IPI00010740	76 kDa	16	15	8	19	1	4	0	0	0.0454571	0.0385178	0.0217835	0.0520562	0.00282741	0.0130467	0	0	0.00059812	0.000506814	0.000286625	0.00068495	3.72028e-05	0.000171668	0	0
350	Isoform 1 of Vitamin D-binding protein	IPI00555812	53 kDa	0	0	0	0	34	0	25	0	0	0	0	0	0.0961321	0	0.072271	0	0	0	0	0	0.00181381	0	0.0013636	0
351	14-3-3 protein gamma	IPI00220642	28 kDa	4	9	9	5	29	1	15	4	0.0113643	0.0231107	0.0245065	0.013699	0.081995	0.00326168	0.0433626	0.015024	0.000405867	0.000825382	0.000875231	0.00048925	0.00292839	0.000116489	0.00154867	0.000536573
352	Matrix Gla protein	IPI00028714	12 kDa	13	7	12	3	9	6	10	6	0.0369339	0.017975	0.0326753	0.0082194	0.0254467	0.0195701	0.0289084	0.0225361	0.00307783	0.00149792	0.00272294	0.00068495	0.00212056	0.00163084	0.00240903	0.001878
353	Isoform 1 of Olfactomedin-like protein 3	IPI00024621	46 kDa	23	19	19	8	2	0	2	0	0.0653446	0.0487893	0.0517359	0.0219184	0.00565483	0	0.00578168	0	0.00142054	0.00106064	0.00112469	0.000476487	0.000122931	0	0.000125689	0
354	similar to hCG2044193	IPI00886949	98 kDa	0	0	0	0	5	8	7	20	0	0	0	0	0.0141371	0.0260935	0.0202359	0.0751202	0	0	0	0	0.000144256	0.00026626	0.000206489	0.000766533
355	39S ribosomal protein L33, mitochondrial	IPI00006864	8 kDa	8	10	7	10	3	9	3	1	0.0227286	0.0256786	0.0190606	0.027398	0.00848224	0.0293552	0.00867253	0.00375601	0.00284107	0.00320982	0.00238257	0.00342475	0.00106028	0.0036694	0.00108407	0.000469501
356	Keratin, type I cuticular Ha1	IPI00032513	47 kDa	0	25	28	18	27	43	35	30	0	0.0641964	0.0762423	0.0493164	0.0763402	0.140252	0.101179	0.11268	0	0.00136588	0.00162218	0.00104929	0.00162426	0.00298409	0.00215275	0.00239745
357	Integrin alpha-4 precursor	IPI00009803	115 kDa	11	11	19	14	1	0	1	0	0.0312518	0.0282464	0.0517359	0.0383572	0.00282741	0	0.00289084	0	0.000271755	0.000245621	0.000449877	0.000333541	2.45862e-05	0	2.51378e-05	0
358	Proteasome subunit alpha type-6	IPI00029623	27 kDa	1	2	1	2	33	5	18	4	0.00284107	0.00513571	0.00272294	0.0054796	0.0933047	0.0163084	0.0520352	0.015024	0.000105225	0.000190212	0.00010085	0.000202948	0.00345573	0.000604016	0.00192723	0.000556446
359	Importin-7	IPI00007402	120 kDa	0	0	0	0	22	12	28	4	0	0	0	0	0.0622031	0.0391402	0.0809436	0.015024	0	0	0	0	0.000518359	0.000326168	0.00067453	0.0001252
360	Guanine nucleotide-binding protein G(I)/G(S)/G(T) subunit beta-2	IPI00003348	37 kDa	5	3	4	7	11	2	16	2	0.0142054	0.00770357	0.0108918	0.0191786	0.0311016	0.00652337	0.0462535	0.00751202	0.000383928	0.000208205	0.000294372	0.000518341	0.000840583	0.000176307	0.00125009	0.000203028
361	Small nuclear ribonucleoprotein Sm D1	IPI00302850	13 kDa	6	5	4	4	10	9	13	7	0.0170464	0.0128393	0.0108918	0.0109592	0.0282741	0.0293552	0.0375809	0.0262921	0.00131126	0.000987637	0.000837828	0.000843016	0.00217493	0.00225809	0.00289084	0.00202247
362	Isoform 1 of Tensin-like C1 domain-containing phosphatase	IPI00465295	153 kDa	14	36	14	44	0	1	0	0	0.039775	0.0924428	0.0381212	0.120551	0	0.00326168	0	0	0.000259967	0.000604201	0.000249158	0.000787917	0	2.13182e-05	0	0
363	Histone H2B type 2-E	IPI00003935	14 kDa	75	57	76	55	41	42	55	55	0.21308	0.146368	0.206943	0.150689	0.115924	0.136991	0.158996	0.206581	0.01522	0.0104548	0.0147817	0.0107635	0.00828029	0.00978505	0.0113569	0.0147558
364	suprabasin isoform 1 precursor	IPI00947285	61 kDa	0	6	2	6	5	18	5	18	0	0.0154071	0.00544588	0.0164388	0.0141371	0.0587103	0.0144542	0.0676082	0	0.000252576	8.92767e-05	0.000269489	0.000231755	0.000962464	0.000236954	0.00110833
365	eukaryotic translation elongation factor 1 delta isoform 3	IPI00789435	71 kDa	0	1	1	1	25	1	23	2	0	0.00256786	0.00272294	0.0027398	0.0706854	0.00326168	0.0664894	0.00751202	0	3.6167e-05	3.83513e-05	3.85887e-05	0.000995569	4.59392e-05	0.00093647	0.000105803
366	Putative uncharacterized protein MEGF6 (Fragment)	IPI00940881	171 kDa	28	12	11	4	1	0	0	0	0.07955	0.0308143	0.0299523	0.0109592	0.00282741	0	0	0	0.000465205	0.0001802	0.00017516	6.40889e-05	1.65346e-05	0	0	0
367	Isoform 2 of TRIO and F-actin-binding protein	IPI00413160	261 kDa	9	11	9	24	0	0	0	0	0.0255696	0.0282464	0.0245065	0.0657552	0	0	0	0	9.79679e-05	0.000108224	9.38945e-05	0.000251936	0	0	0	0
368	Active regulator of SIRT1	IPI00219006	15 kDa	7	13	11	11	7	13	5	4	0.0198875	0.0333821	0.0299523	0.0301378	0.0197919	0.0424019	0.0144542	0.015024	0.00132583	0.00222547	0.00199682	0.00200919	0.00131946	0.00282679	0.000963614	0.0010016
369	chemokine (C-X-C motif) ligand 12 (stromal cell-derived factor 1) isoform gamma	IPI00413781	14 kDa	16	9	11	7	6	4	2	3	0.0454571	0.0231107	0.0299523	0.0191786	0.0169645	0.0130467	0.00578168	0.011268	0.00324694	0.00165076	0.00213945	0.0013699	0.00121175	0.00093191	0.000412977	0.000804859
370	Protein S100-A4	IPI00032313	12 kDa	4	9	6	9	4	2	7	0	0.0113643	0.0231107	0.0163376	0.0246582	0.0113097	0.00652337	0.0202359	0	0.000947024	0.00192589	0.00136147	0.00205485	0.000942472	0.000543614	0.00168632	0
371	Elongation factor 2	IPI00186290	95 kDa	6	7	6	12	6	2	13	3	0.0170464	0.017975	0.0163376	0.0328776	0.0169645	0.00652337	0.0375809	0.011268	0.000179436	0.00018921	0.000171975	0.00034608	0.000178574	6.86671e-05	0.000395589	0.000118611
372	laminin alpha 2 subunit isoform b precursor	IPI00218725	344 kDa	3	24	6	17	3	1	1	0	0.00852321	0.0616285	0.0163376	0.0465766	0.00848224	0.00326168	0.00289084	0	2.47768e-05	0.000179153	4.74932e-05	0.000135397	2.46577e-05	9.48164e-06	8.40361e-06	0
373	Putative uncharacterized protein NAP1L4	IPI00017763	44 kDa	0	0	0	0	15	8	22	16	0	0	0	0	0.0424112	0.0260935	0.0635985	0.0600962	0	0	0	0	0.000963891	0.000593034	0.00144542	0.00136582
374	39S ribosomal protein L11, mitochondrial	IPI00007001	21 kDa	12	10	6	8	4	3	1	3	0.0340928	0.0256786	0.0163376	0.0219184	0.0113097	0.00978505	0.00289084	0.011268	0.00162347	0.00122279	0.000777983	0.00104373	0.000538555	0.000465955	0.000137659	0.000536573
375	Isoform 1 of Polyadenylate-binding protein 1	IPI00008524	71 kDa	0	4	0	1	18	0	27	7	0	0.0102714	0	0.0027398	0.0508935	0	0.0780527	0.0262921	0	0.000144668	0	3.85887e-05	0.000716809	0	0.00109933	0.000370311
376	Periostin, osteoblast specific factor	IPI00641231	90 kDa	12	12	14	7	1	0	0	0	0.0340928	0.0308143	0.0381212	0.0191786	0.00282741	0	0	0	0.000378809	0.000342381	0.000423569	0.000213096	3.14157e-05	0	0	0
377	Semaphorin-3A	IPI00031510	89 kDa	17	18	7	12	0	0	0	0	0.0482982	0.0462214	0.0190606	0.0328776	0	0	0	0	0.000542676	0.000519342	0.000214164	0.000369411	0	0	0	0
378	ATP-dependent RNA helicase DDX3X	IPI00215637	73 kDa	9	20	2	14	0	2	3	3	0.0255696	0.0513571	0.00544588	0.0383572	0	0.00652337	0.00867253	0.011268	0.000350269	0.000703522	7.46011e-05	0.000525441	0	8.93612e-05	0.000118802	0.000154357
379	Putative 60S ribosomal protein L39-like 5	IPI00037619	6 kDa	3	3	3	1	3	3	3	2	0.00852321	0.00770357	0.00816882	0.0027398	0.00848224	0.00978505	0.00867253	0.00751202	0.00142054	0.00128393	0.00136147	0.000456634	0.00141371	0.00163084	0.00144542	0.001252
380	Isoform 1 of Hemicentin-1	IPI00871227	613 kDa	14	11	11	3	1	0	0	0	0.039775	0.0282464	0.0299523	0.0082194	0.00282741	0	0	0	6.48858e-05	4.6079e-05	4.88619e-05	1.34085e-05	4.61242e-06	0	0	0
381	Isoform 1 of Beta-2-syntrophin	IPI00009505	58 kDa	8	18	8	22	2	0	1	2	0.0227286	0.0462214	0.0217835	0.0602756	0.00565483	0	0.00289084	0.00751202	0.000391872	0.000796921	0.000375578	0.00103923	9.74971e-05	0	4.98421e-05	0.000129518
382	Ribonuclease inhibitor	IPI00550069	50 kDa	1	4	2	3	23	1	25	3	0.00284107	0.0102714	0.00544588	0.0082194	0.0650305	0.00326168	0.072271	0.011268	5.68214e-05	0.000205428	0.000108918	0.000164388	0.00130061	6.52337e-05	0.00144542	0.000225361
383	Isoform 1 of Heterogeneous nuclear ribonucleoprotein D-like	IPI00011274	46 kDa	10	14	12	11	0	4	2	2	0.0284107	0.03595	0.0326753	0.0301378	0	0.0130467	0.00578168	0.00751202	0.000617624	0.000781521	0.000710332	0.00065517	0	0.000283625	0.000125689	0.000163305
384	Coatomer subunit epsilon	IPI00465132	34 kDa	0	0	0	1	21	5	20	6	0	0	0	0.0027398	0.0593757	0.0163084	0.0578168	0.0225361	0	0	0	8.05824e-05	0.00174634	0.00047966	0.0017005	0.000662825
385	Alpha-amylase 1	IPI00300786	58 kDa	0	47	0	0	0	6	1	2	0	0.120689	0	0	0	0.0195701	0.00289084	0.00751202	0	0.00208085	0	0	0	0.000337416	4.98421e-05	0.000129518
386	Endoplasmin	IPI00027230	92 kDa	2	1	1	1	47	9	34	7	0.00568214	0.00256786	0.00272294	0.0027398	0.132888	0.0293552	0.0982886	0.0262921	6.17624e-05	2.79115e-05	2.95972e-05	2.97804e-05	0.00144444	0.000319078	0.00106835	0.000285783
387	Calpain-2 catalytic subunit	IPI00289758	80 kDa	0	0	0	3	13	3	19	2	0	0	0	0.0082194	0.0367564	0.00978505	0.054926	0.00751202	0	0	0	0.000102743	0.000459455	0.000122313	0.000686575	9.39002e-05
388	Isoform 1 of Integrin alpha-V	IPI00027505	116 kDa	7	11	20	19	0	0	1	0	0.0198875	0.0282464	0.0544588	0.0520562	0	0	0.00289084	0	0.000171444	0.000243504	0.000469473	0.000448761	0	0	2.49211e-05	0
389	Isoform 1 of Transportin-1	IPI00024364	102 kDa	0	0	0	0	21	8	17	9	0	0	0	0	0.0593757	0.0260935	0.0491443	0.0338041	0	0	0	0	0.000582115	0.000255818	0.000481807	0.000331413
390	Fructose-bisphosphate aldolase A	IPI00465439	39 kDa	5	10	3	4	6	2	10	3	0.0142054	0.0256786	0.00816882	0.0109592	0.0169645	0.00652337	0.0289084	0.011268	0.00036424	0.000658425	0.000209457	0.000281005	0.000434987	0.000167266	0.000741241	0.000288924
391	Isoform 1 of LIM and SH3 domain protein 1	IPI00000861	30 kDa	4	8	16	25	0	0	1	4	0.0113643	0.0205428	0.0435671	0.068495	0	0	0.00289084	0.015024	0.000378809	0.000684761	0.00145224	0.00228317	0	0	9.63614e-05	0.000500801
392	Isoform 1 of Netrin-4	IPI00328091	70 kDa	8	22	3	9	0	0	2	0	0.0227286	0.0564928	0.00816882	0.0246582	0	0	0.00578168	0	0.000324694	0.00080704	0.000116697	0.00035226	0	0	8.25955e-05	0
393	Tyrosine-protein kinase SgK223	IPI00739386	150 kDa	10	15	13	13	0	0	0	0	0.0284107	0.0385178	0.0353982	0.0356174	0	0	0	0	0.000189405	0.000256786	0.000235988	0.000237449	0	0	0	0
394	Proteasome 26S non-ATPase subunit 11 variant (Fragment)	IPI00105598	48 kDa	0	0	0	0	12	4	26	3	0	0	0	0	0.033929	0.0130467	0.0751619	0.011268	0	0	0	0	0.000706854	0.000271807	0.00156587	0.000234751
395	Ras-related protein Ral-A	IPI00217519	24 kDa	13	6	5	5	9	5	6	8	0.0369339	0.0154071	0.0136147	0.013699	0.0254467	0.0163084	0.0173451	0.0300481	0.00153891	0.000641964	0.000567279	0.000570792	0.00106028	0.000679518	0.00072271	0.001252
396	Transgelin	IPI00216138	23 kDa	9	11	10	10	5	1	7	3	0.0255696	0.0282464	0.0272294	0.027398	0.0141371	0.00326168	0.0202359	0.011268	0.00111172	0.0012281	0.00118389	0.00119122	0.000614655	0.000141812	0.000879821	0.000489914
397	Secreted frizzled-related protein 1	IPI00749245	35 kDa	6	9	1	2	1	8	1	8	0.0170464	0.0231107	0.00272294	0.0054796	0.00282741	0.0260935	0.00289084	0.0300481	0.000487041	0.000660306	7.77983e-05	0.00015656	8.07833e-05	0.000745528	8.25955e-05	0.000858516
398	Microtubule-associated protein	IPI00927819	85 kDa	1	3	1	4	1	0	1	2	0.00284107	0.00770357	0.00272294	0.0109592	0.00282741	0	0.00289084	0.00751202	3.34244e-05	9.06302e-05	3.20346e-05	0.000128932	3.32637e-05	0	3.40099e-05	8.83767e-05
399	Insulin-like growth factor-binding protein 7	IPI00016915	29 kDa	8	13	9	13	0	0	0	0	0.0227286	0.0333821	0.0245065	0.0356174	0	0	0	0	0.000783744	0.00115111	0.000845051	0.00122819	0	0	0	0
400	Isoform Flt1 of Vascular endothelial growth factor receptor 1	IPI00018335	151 kDa	4	11	5	6	2	2	8	3	0.0113643	0.0282464	0.0136147	0.0164388	0.00565483	0.00652337	0.0231267	0.011268	7.52601e-05	0.000187062	9.01636e-05	0.000108866	3.74492e-05	4.32011e-05	0.000153157	7.46227e-05
401	Isoform 1 of AP-2 complex subunit beta	IPI00784156	105 kDa	1	1	1	1	11	2	20	8	0.00284107	0.00256786	0.00272294	0.0027398	0.0311016	0.00652337	0.0578168	0.0300481	2.70578e-05	2.44558e-05	2.59328e-05	2.60933e-05	0.000296205	6.21273e-05	0.000550637	0.000286172
402	Chondroitin sulfate proteoglycan 4	IPI00019157	250 kDa	0	2	0	1	13	18	8	4	0	0.00513571	0	0.0027398	0.0367564	0.0587103	0.0231267	0.015024	0	2.05428e-05	0	1.09592e-05	0.000147026	0.000234841	9.25069e-05	6.00962e-05
403	Serine/threonine-protein phosphatase PP1-beta catalytic subunit	IPI00218236	37 kDa	1	0	1	4	14	1	21	2	0.00284107	0	0.00272294	0.0109592	0.0395838	0.00326168	0.0607077	0.00751202	7.67857e-05	0	7.3593e-05	0.000296195	0.00106983	8.81536e-05	0.00164075	0.000203028
404	High mobility group protein HMGI-C	IPI00005996	12 kDa	5	7	13	7	1	1	2	1	0.0142054	0.017975	0.0353982	0.0191786	0.00282741	0.00326168	0.00578168	0.00375601	0.00118378	0.00149792	0.00294985	0.00159822	0.000235618	0.000271807	0.000481807	0.000313001
405	Isoform 12 of CD44 antigen	IPI00297160	39 kDa	1	3	3	1	24	6	17	9	0.00284107	0.00770357	0.00816882	0.0027398	0.067858	0.0195701	0.0491443	0.0338041	7.2848e-05	0.000197527	0.000209457	7.02513e-05	0.00173995	0.000501798	0.00126011	0.000866771
406	THO complex 4	IPI00328840	28 kDa	21	8	14	10	2	2	3	2	0.0596625	0.0205428	0.0381212	0.027398	0.00565483	0.00652337	0.00867253	0.00751202	0.0021308	0.000733673	0.00136147	0.0009785	0.000201958	0.000232977	0.000309733	0.000268286
407	Protein disulfide-isomerase	IPI00010796	57 kDa	8	12	10	10	6	0	5	0	0.0227286	0.0308143	0.0272294	0.027398	0.0169645	0	0.0144542	0	0.000398747	0.000540601	0.000477709	0.000480667	0.000297623	0	0.000253583	0
408	Isoform Alpha of Tissue factor pathway inhibitor	IPI00021834	35 kDa	11	17	9	12	0	0	0	0	0.0312518	0.0436535	0.0245065	0.0328776	0	0	0	0	0.000892908	0.00124724	0.000700185	0.00093936	0	0	0	0
409	Guanine nucleotide-binding protein G(I)/G(S)/G(O) subunit gamma-12	IPI00221232	8 kDa	4	1	7	5	7	5	6	10	0.0113643	0.00256786	0.0190606	0.013699	0.0197919	0.0163084	0.0173451	0.0375601	0.00142054	0.000320982	0.00238257	0.00171238	0.00247399	0.00203855	0.00216813	0.00469501
410	cDNA FLJ61162, highly similar to Ras-related protein R-Ras2	IPI00012512	24 kDa	0	2	2	4	12	3	19	10	0	0.00513571	0.00544588	0.0109592	0.033929	0.00978505	0.054926	0.0375601	0	0.000213988	0.000226912	0.000456634	0.00141371	0.000407711	0.00228858	0.001565
411	Isoform 1 of Myosin-10	IPI00397526	229 kDa	26	179	46	133	110	0	86	0	0.0738678	0.459646	0.125255	0.364394	0.311016	0	0.248612	0	0.000322567	0.00200719	0.000546966	0.00159124	0.00135815	0	0.00108564	0
412	Isoform 1 of Focal adhesion kinase 1	IPI00012885	119 kDa	3	12	8	16	0	0	0	0	0.00852321	0.0308143	0.0217835	0.0438368	0	0	0	0	7.16236e-05	0.000258943	0.000183055	0.000368377	0	0	0	0
413	Isoform Short of Proteasome subunit alpha type-1	IPI00016832	30 kDa	0	0	0	0	28	0	20	1	0	0	0	0	0.0791676	0	0.0578168	0.00375601	0	0	0	0	0.00263892	0	0.00192723	0.0001252
414	Isoform 1 of DNA-dependent protein kinase catalytic subunit	IPI00296337	469 kDa	0	0	0	0	3	1	4	0	0	0	0	0	0.00848224	0.00326168	0.0115634	0	0	0	0	0	1.80858e-05	6.95455e-06	2.46554e-05	0
415	Peroxiredoxin-6	IPI00220301	25 kDa	1	5	5	9	2	2	5	5	0.00284107	0.0128393	0.0136147	0.0246582	0.00565483	0.00652337	0.0144542	0.01878	0.000113643	0.000513571	0.000544588	0.000986328	0.000226193	0.000260935	0.000578168	0.000751202
416	cDNA, FLJ79184, highly similar to Procollagen-lysine, 2-oxoglutarate 5-dioxygenase 1	IPI00027192	88 kDa	5	14	5	14	4	1	1	0	0.0142054	0.03595	0.0136147	0.0383572	0.0113097	0.00326168	0.00289084	0	0.000161424	0.000408522	0.000154713	0.000435877	0.000128519	3.70646e-05	3.28505e-05	0
417	CSNK2A1 protein	IPI00016613	46 kDa	0	0	0	0	14	8	15	8	0	0	0	0	0.0395838	0.0260935	0.0433626	0.0300481	0	0	0	0	0.000860517	0.00056725	0.000942666	0.000653219
418	cDNA FLJ58478, highly similar to Glypican-6	IPI00911077	49 kDa	0	0	0	0	7	11	3	16	0	0	0	0	0.0197919	0.0358785	0.00867253	0.0600962	0	0	0	0	0.000403916	0.000732215	0.00017699	0.00122645
419	T-complex protein 1 subunit alpha	IPI00290566	60 kDa	1	1	0	0	19	0	21	0	0.00284107	0.00256786	0	0	0.0537209	0	0.0607077	0	4.73512e-05	4.27976e-05	0	0	0.000895348	0	0.00101179	0
420	Cytochrome c oxidase subunit 6C	IPI00015972	9 kDa	15	3	9	4	2	3	1	1	0.0426161	0.00770357	0.0245065	0.0109592	0.00565483	0.00978505	0.00289084	0.00375601	0.00473512	0.000855952	0.00272294	0.00121769	0.000628314	0.00108723	0.000321205	0.000417334
421	Splicing factor, arginine/serine-rich 3	IPI00010204	19 kDa	4	4	6	4	8	5	7	9	0.0113643	0.0102714	0.0163376	0.0109592	0.0226193	0.0163084	0.0202359	0.0338041	0.00059812	0.000540601	0.000859876	0.0005768	0.00119049	0.000858338	0.00106505	0.00177916
422	Isoform 1 of FERM, RhoGEF and pleckstrin domain-containing protein 1	IPI00024773	119 kDa	0	0	0	1	0	4	7	16	0	0	0	0.0027398	0	0.0130467	0.0202359	0.0600962	0	0	0	2.30235e-05	0	0.000109636	0.00017005	0.00050501
423	Eukaryotic translation initiation factor 3 subunit M	IPI00102069	43 kDa	0	0	0	0	22	2	22	5	0	0	0	0	0.0622031	0.00652337	0.0635985	0.01878	0	0	0	0	0.00144658	0.000151706	0.00147904	0.000436745
424	Ras-related protein Rab-1B	IPI00008964	22 kDa	2	2	1	0	9	7	17	2	0.00568214	0.00513571	0.00272294	0	0.0254467	0.0228318	0.0491443	0.00751202	0.000258279	0.000233441	0.00012377	0	0.00115667	0.00103781	0.00223383	0.000341455
425	chaperonin containing TCP1, subunit 3 isoform b	IPI00290770	60 kDa	2	3	0	1	22	0	22	0	0.00568214	0.00770357	0	0.0027398	0.0622031	0	0.0635985	0	9.47024e-05	0.000128393	0	4.56634e-05	0.00103672	0	0.00105998	0
426	RuvB-like 2	IPI00009104	51 kDa	0	0	0	0	21	0	21	4	0	0	0	0	0.0593757	0	0.0607077	0.015024	0	0	0	0	0.00116423	0	0.00119035	0.000294589
427	Nuclease-sensitive element-binding protein 1	IPI00031812	36 kDa	8	3	5	6	12	3	13	3	0.0227286	0.00770357	0.0136147	0.0164388	0.033929	0.00978505	0.0375809	0.011268	0.000631349	0.000213988	0.000378186	0.000456634	0.000942472	0.000271807	0.00104392	0.000313001
428	39S ribosomal protein L34, mitochondrial	IPI00028390	10 kDa	7	8	3	6	2	3	2	2	0.0198875	0.0205428	0.00816882	0.0164388	0.00565483	0.00978505	0.00578168	0.00751202	0.00198875	0.00205428	0.000816882	0.00164388	0.000565483	0.000978505	0.000578168	0.000751202
429	Isoform SM-B' of Small nuclear ribonucleoprotein-associated proteins B and B'	IPI00027285	25 kDa	1	1	1	1	8	8	14	7	0.00284107	0.00256786	0.00272294	0.0027398	0.0226193	0.0260935	0.0404718	0.0262921	0.000113643	0.000102714	0.000108918	0.000109592	0.000904773	0.00104374	0.00161887	0.00105168
430	HCG1784554, isoform CRA_a	IPI00654777	39 kDa	1	1	2	1	14	0	25	9	0.00284107	0.00256786	0.00544588	0.0027398	0.0395838	0	0.072271	0.0338041	7.2848e-05	6.58425e-05	0.000139638	7.02513e-05	0.00101497	0	0.0018531	0.000866771
431	PDZ and LIM domain protein 5	IPI00007935	64 kDa	3	8	6	22	0	0	0	0	0.00852321	0.0205428	0.0163376	0.0602756	0	0	0	0	0.000133175	0.000320982	0.000255276	0.000941807	0	0	0	0
432	Dynein light chain 1, cytoplasmic	IPI00019329	10 kDa	5	4	6	9	5	5	7	0	0.0142054	0.0102714	0.0163376	0.0246582	0.0141371	0.0163084	0.0202359	0	0.00142054	0.00102714	0.00163376	0.00246582	0.00141371	0.00163084	0.00202359	0
433	Isoform 1 of Podocan	IPI00419440	69 kDa	5	4	6	2	16	0	16	1	0.0142054	0.0102714	0.0163376	0.0054796	0.0452386	0	0.0462535	0.00375601	0.000205875	0.000148861	0.000236777	7.94145e-05	0.000655632	0	0.00067034	5.44349e-05
434	Peptidyl-prolyl cis-trans isomerase B	IPI00646304	24 kDa	7	12	12	6	2	0	0	1	0.0198875	0.0308143	0.0326753	0.0164388	0.00565483	0	0	0.00375601	0.000828646	0.00128393	0.00136147	0.00068495	0.000235618	0	0	0.0001565
435	Procollagen C-endopeptidase enhancer 1	IPI00299738	48 kDa	11	13	12	11	0	0	0	0	0.0312518	0.0333821	0.0326753	0.0301378	0	0	0	0	0.000651079	0.000695461	0.000680735	0.000627871	0	0	0	0
436	26S protease regulatory subunit S10B	IPI00021926	44 kDa	0	0	0	0	22	2	19	1	0	0	0	0	0.0622031	0.00652337	0.054926	0.00375601	0	0	0	0	0.00141371	0.000148258	0.00124832	8.53639e-05
437	Syndecan-2	IPI00300407	22 kDa	0	0	0	0	10	15	13	18	0	0	0	0	0.0282741	0.0489253	0.0375809	0.0676082	0	0	0	0	0.00128519	0.00222388	0.00170822	0.0030731
438	Caspase-14	IPI00013885	28 kDa	4	5	7	4	7	7	1	11	0.0113643	0.0128393	0.0190606	0.0109592	0.0197919	0.0228318	0.00289084	0.0413161	0.000405867	0.000458546	0.000680735	0.0003914	0.000706854	0.000815421	0.000103244	0.00147558
439	Isoform 1 of Septin-2	IPI00014177	41 kDa	1	12	11	6	3	0	7	0	0.00284107	0.0308143	0.0299523	0.0164388	0.00848224	0	0.0202359	0	6.92944e-05	0.000751567	0.000730545	0.000400947	0.000206884	0	0.000493558	0
440	Isoform 1 of Pleckstrin homology-like domain family B member 1	IPI00413100	151 kDa	6	12	8	17	0	0	0	1	0.0170464	0.0308143	0.0217835	0.0465766	0	0	0	0.00375601	0.00011289	0.000204068	0.000144262	0.000308454	0	0	0	2.48742e-05
441	Heterogeneous nuclear ribonucleoprotein L	IPI00027834	64 kDa	13	14	9	10	0	0	0	0	0.0369339	0.03595	0.0245065	0.027398	0	0	0	0	0.000577092	0.000561718	0.000382914	0.000428094	0	0	0	0
442	HSPC027	IPI00549672	43 kDa	0	0	0	0	16	2	17	10	0	0	0	0	0.0452386	0.00652337	0.0491443	0.0375601	0	0	0	0	0.00105206	0.000151706	0.00114289	0.000873491
443	Isoform 1 of PDZ and LIM domain protein 7	IPI00023122	50 kDa	4	8	11	18	1	0	1	0	0.0113643	0.0205428	0.0299523	0.0493164	0.00282741	0	0.00289084	0	0.000227286	0.000410857	0.000599047	0.000986328	5.65483e-05	0	5.78168e-05	0
444	Ras suppressor protein 1	IPI00017256	32 kDa	4	5	7	20	1	0	0	0	0.0113643	0.0128393	0.0190606	0.054796	0.00282741	0	0	0	0.000355134	0.000401227	0.000595643	0.00171238	8.83567e-05	0	0	0
445	LIM domain-containing protein 1	IPI00003369	72 kDa	5	17	9	18	0	0	0	0	0.0142054	0.0436535	0.0245065	0.0493164	0	0	0	0	0.000197297	0.000606299	0.000340368	0.00068495	0	0	0	0
446	Proteasome subunit beta type-1	IPI00025019	26 kDa	0	0	0	0	24	0	23	0	0	0	0	0	0.067858	0	0.0664894	0	0	0	0	0	0.00260992	0	0.00255728	0
447	Isoform 2 of Gelsolin	IPI00646773	81 kDa	3	9	9	10	5	0	3	4	0.00852321	0.0231107	0.0245065	0.027398	0.0141371	0	0.00867253	0.015024	0.000105225	0.000285317	0.000302549	0.000338247	0.000174532	0	0.000107068	0.000185482
448	Isoform 1 of ELKS/RAB6-interacting/CAST family member 1	IPI00216719	128 kDa	2	10	7	18	0	3	1	7	0.00568214	0.0256786	0.0190606	0.0493164	0	0.00978505	0.00289084	0.0262921	4.43917e-05	0.000200614	0.000148911	0.000385285	0	7.64457e-05	2.25847e-05	0.000205407
449	Tissue factor pathway inhibitor 2	IPI00009198	27 kDa	6	14	2	11	1	2	0	0	0.0170464	0.03595	0.00544588	0.0301378	0.00282741	0.00652337	0	0	0.000631349	0.00133148	0.000201699	0.00111622	0.000104719	0.000241606	0	0
450	Isoform Beta of LIM domain and actin-binding protein 1	IPI00008918	85 kDa	1	6	6	22	1	0	0	0	0.00284107	0.0154071	0.0163376	0.0602756	0.00282741	0	0	0	3.34244e-05	0.00018126	0.000192208	0.000709125	3.32637e-05	0	0	0
451	COP9 signalosome complex subunit 6	IPI00163230	36 kDa	0	0	0	0	18	5	13	9	0	0	0	0	0.0508935	0.0163084	0.0375809	0.0338041	0	0	0	0	0.00141371	0.000453012	0.00104392	0.000939002
452	COP9 signalosome complex subunit 3	IPI00025721	48 kDa	0	0	0	0	13	9	19	4	0	0	0	0	0.0367564	0.0293552	0.054926	0.015024	0	0	0	0	0.000765758	0.000611566	0.00114429	0.000313001
453	HLA class I histocompatibility antigen, A-30 alpha chain	IPI00472855	41 kDa	0	0	0	0	71	36	70	27	0	0	0	0	0.200746	0.117421	0.202359	0.101412	0	0	0	0	0.00489625	0.00286392	0.00493558	0.00247347
454	Catalase	IPI00465436	60 kDa	1	9	6	10	8	6	7	6	0.00284107	0.0231107	0.0163376	0.027398	0.0226193	0.0195701	0.0202359	0.0225361	4.73512e-05	0.000385178	0.000272294	0.000456634	0.000376989	0.000326168	0.000337265	0.000375601
455	Keratin, type II cuticular Hb4	IPI00300052	65 kDa	51	59	65	63	74	91	68	70	0.144895	0.151503	0.176991	0.172607	0.209229	0.296813	0.196577	0.262921	0.00222915	0.00233082	0.00272294	0.0026555	0.0032189	0.00456636	0.00302427	0.00404493
456	Isoform 1 of Exostosin-2	IPI00004047	82 kDa	0	0	0	0	12	15	10	14	0	0	0	0	0.033929	0.0489253	0.0289084	0.0525841	0	0	0	0	0.000413768	0.00059665	0.000352542	0.00064127
457	Isoform 5 of ARF GTPase-activating protein GIT2	IPI00216994	81 kDa	2	4	12	17	0	0	0	0	0.00568214	0.0102714	0.0326753	0.0465766	0	0	0	0	7.01499e-05	0.000126808	0.000403399	0.00057502	0	0	0	0
458	hypothetical protein LOC643677	IPI00929313	802 kDa	0	0	0	0	4	5	7	4	0	0	0	0	0.0113097	0.0163084	0.0202359	0.015024	0	0	0	0	1.41018e-05	2.03347e-05	2.52318e-05	1.87332e-05
459	cDNA FLJ51518, highly similar to Annexin A11	IPI00909703	46 kDa	0	0	0	0	18	0	39	0	0	0	0	0	0.0508935	0	0.112743	0	0	0	0	0	0.00110638	0	0.00245093	0
460	Isoform 1 of Arginase-1	IPI00291560	35 kDa	2	3	4	2	1	5	5	4	0.00568214	0.00770357	0.0108918	0.0054796	0.00282741	0.0163084	0.0144542	0.015024	0.000162347	0.000220102	0.000311193	0.00015656	8.07833e-05	0.000465955	0.000412977	0.000429258
461	Isoform 2 of Spliceosome RNA helicase BAT1	IPI00641829	51 kDa	0	1	1	1	14	1	15	1	0	0.00256786	0.00272294	0.0027398	0.0395838	0.00326168	0.0433626	0.00375601	0	5.03501e-05	5.3391e-05	5.37216e-05	0.000776153	6.39546e-05	0.000850248	7.36472e-05
462	Isoform B of Collagen alpha-1(XI) chain	IPI00218539	182 kDa	2	3	4	7	9	1	9	4	0.00568214	0.00770357	0.0108918	0.0191786	0.0254467	0.00326168	0.0260176	0.015024	3.12206e-05	4.23273e-05	5.98449e-05	0.000105377	0.000139817	1.79213e-05	0.000142954	8.25497e-05
463	Protein S100-A11	IPI00013895	12 kDa	1	1	2	4	9	1	16	2	0.00284107	0.00256786	0.00544588	0.0109592	0.0254467	0.00326168	0.0462535	0.00751202	0.000236756	0.000213988	0.000453823	0.000913267	0.00212056	0.000271807	0.00385446	0.000626002
464	Protein-glutamine gamma-glutamyltransferase E	IPI00300376	77 kDa	1	4	4	8	2	7	6	4	0.00284107	0.0102714	0.0108918	0.0219184	0.00565483	0.0228318	0.0173451	0.015024	3.6897e-05	0.000133395	0.000141451	0.000284655	7.34393e-05	0.000296517	0.00022526	0.000195117
465	14-3-3 protein theta	IPI00018146	28 kDa	0	11	5	7	20	0	10	3	0	0.0282464	0.0136147	0.0191786	0.0565483	0	0.0289084	0.011268	0	0.0010088	0.000486239	0.00068495	0.00201958	0	0.00103244	0.00040243
466	26S protease regulatory subunit 8	IPI00023919	46 kDa	0	0	0	0	18	0	12	7	0	0	0	0	0.0508935	0	0.0346901	0.0262921	0	0	0	0	0.00110638	0	0.000754133	0.000571567
467	Proteasome subunit alpha type-4	IPI00299155	29 kDa	0	0	0	0	19	1	14	4	0	0	0	0	0.0537209	0.00326168	0.0404718	0.015024	0	0	0	0	0.00185244	0.000112472	0.00139558	0.00051807
468	60S ribosomal protein L7-like 1	IPI00456940	29 kDa	9	7	4	7	3	2	2	1	0.0255696	0.017975	0.0108918	0.0191786	0.00848224	0.00652337	0.00578168	0.00375601	0.000881712	0.000619827	0.000375578	0.000661331	0.000292491	0.000224944	0.000199368	0.000129518
469	Valyl-tRNA synthetase	IPI00000873	140 kDa	1	0	1	1	3	1	8	0	0.00284107	0	0.00272294	0.0027398	0.00848224	0.00326168	0.0231267	0	2.02934e-05	0	1.94496e-05	1.957e-05	6.05875e-05	2.32977e-05	0.000165191	0
470	Complement C4-A	IPI00032258	193 kDa	1	2	1	0	11	0	11	0	0.00284107	0.00513571	0.00272294	0	0.0311016	0	0.0317993	0	1.47206e-05	2.66099e-05	1.41085e-05	0	0.000161148	0	0.000164763	0
471	cDNA FLJ61290, highly similar to Neutral alpha-glucosidase AB	IPI00383581	113 kDa	0	1	0	0	6	1	9	0	0	0.00256786	0	0	0.0169645	0.00326168	0.0260176	0	0	2.27244e-05	0	0	0.000150128	2.88645e-05	0.000230244	0
472	Eukaryotic translation initiation factor 3, subunit E interacting protein	IPI00465233	71 kDa	0	0	0	0	15	0	18	2	0	0	0	0	0.0424112	0	0.0520352	0.00751202	0	0	0	0	0.000597341	0	0.000732889	0.000105803
473	T-complex protein 1 subunit beta	IPI00297779	57 kDa	0	0	0	0	12	0	20	1	0	0	0	0	0.033929	0	0.0578168	0.00375601	0	0	0	0	0.000595245	0	0.00101433	6.58949e-05
474	Keratin, type I cytoskeletal 27	IPI00328103	50 kDa	29	44	57	61	71	73	76	74	0.082391	0.112986	0.155208	0.167128	0.200746	0.238103	0.219704	0.277945	0.00164782	0.00225971	0.00310415	0.00334256	0.00401493	0.00476206	0.00439408	0.00555889
475	Isoform 2 of Guanine nucleotide-binding protein-like 3	IPI00003886	61 kDa	10	13	4	9	0	0	0	0	0.0284107	0.0333821	0.0108918	0.0246582	0	0	0	0	0.000465749	0.000547248	0.000178553	0.000404233	0	0	0	0
476	Isoform 1 of PTB domain-containing engulfment adapter protein 1	IPI00790010	34 kDa	0	0	0	0	9	2	10	6	0	0	0	0	0.0254467	0.00652337	0.0289084	0.0225361	0	0	0	0	0.000748433	0.000191864	0.000850248	0.000662825
477	Protein transport protein Sec61 subunit beta	IPI00220835	10 kDa	5	5	3	5	4	4	1	3	0.0142054	0.0128393	0.00816882	0.013699	0.0113097	0.0130467	0.00289084	0.011268	0.00142054	0.00128393	0.000816882	0.0013699	0.00113097	0.00130467	0.000289084	0.0011268
478	Ras GTPase-activating protein-binding protein 1	IPI00012442	52 kDa	6	5	3	6	5	0	8	2	0.0170464	0.0128393	0.00816882	0.0164388	0.0141371	0	0.0231267	0.00751202	0.000327816	0.000246909	0.000157093	0.000316131	0.000271867	0	0.000444745	0.000144462
479	ADP-ribosylation factor 1	IPI00215914	21 kDa	1	1	1	3	4	4	3	6	0.00284107	0.00256786	0.00272294	0.0082194	0.0113097	0.0130467	0.00867253	0.0225361	0.000135289	0.000122279	0.000129664	0.0003914	0.000538555	0.000621273	0.000412977	0.00107315
480	Isoform 1 of Clusterin	IPI00291262	52 kDa	1	0	0	0	10	5	11	9	0.00284107	0	0	0	0.0282741	0.0163084	0.0317993	0.0338041	5.4636e-05	0	0	0	0.000543734	0.000313624	0.000611524	0.000650079
481	ADP-ribosylation factor 4	IPI00215918	21 kDa	2	4	1	5	4	5	9	6	0.00568214	0.0102714	0.00272294	0.013699	0.0113097	0.0163084	0.0260176	0.0225361	0.000270578	0.000489115	0.000129664	0.000652334	0.000538555	0.000776592	0.00123893	0.00107315
482	Keratin, type I cytoskeletal 17	IPI00450768	48 kDa	0	126	133	143	122	132	152	150	0	0.32355	0.362151	0.391792	0.344945	0.430542	0.439408	0.563401	0	0.00674062	0.00754482	0.00816232	0.00718635	0.00896963	0.00915433	0.0117375
483	Isoform 2 of Plakophilin-1	IPI00071509	83 kDa	0	5	6	10	3	8	2	11	0	0.0128393	0.0163376	0.027398	0.00848224	0.0260935	0.00578168	0.0413161	0	0.00015469	0.000196839	0.000330097	0.000102196	0.000314379	6.96588e-05	0.000497784
484	26S proteasome non-ATPase regulatory subunit 14	IPI00024821	35 kDa	1	0	0	0	14	2	15	5	0.00284107	0	0	0	0.0395838	0.00652337	0.0433626	0.01878	8.11734e-05	0	0	0	0.00113097	0.000186382	0.00123893	0.000536573
485	Probable ATP-dependent RNA helicase DDX56	IPI00302281	62 kDa	8	16	4	9	0	0	0	0	0.0227286	0.0410857	0.0108918	0.0246582	0	0	0	0	0.00036659	0.000662672	0.000175674	0.000397713	0	0	0	0
486	Histone H2A.V	IPI00018278	14 kDa	80	79	95	77	69	69	74	68	0.227286	0.202861	0.258679	0.210965	0.195092	0.225056	0.213922	0.255409	0.0162347	0.01449	0.0184771	0.0150689	0.0139351	0.0160754	0.0152802	0.0182435
487	Serpin B12	IPI00033583	46 kDa	0	4	1	2	1	6	0	4	0	0.0102714	0.00272294	0.0054796	0.00282741	0.0195701	0	0.015024	0	0.000223292	5.91944e-05	0.000119122	6.14655e-05	0.000425437	0	0.00032661
488	Isoform 3 of Core histone macro-H2A.1	IPI00059366	39 kDa	4	6	1	0	4	3	5	5	0.0113643	0.0154071	0.00272294	0	0.0113097	0.00978505	0.0144542	0.01878	0.000291392	0.000395055	6.9819e-05	0	0.000289991	0.000250899	0.000370621	0.00048154
489	Ras-related protein Rab-5C	IPI00016339	23 kDa	1	0	1	2	11	2	16	5	0.00284107	0	0.00272294	0.0054796	0.0311016	0.00652337	0.0462535	0.01878	0.000123525	0	0.000118389	0.000238244	0.00135224	0.000283625	0.00201102	0.000816524
490	ADM	IPI00017968	20 kDa	3	4	12	6	0	0	1	0	0.00852321	0.0102714	0.0326753	0.0164388	0	0	0.00289084	0	0.000426161	0.000513571	0.00163376	0.00082194	0	0	0.000144542	0
491	Nucleosome assembly protein 1-like 1, isoform CRA_c	IPI00902909	37 kDa	0	0	0	0	16	5	25	7	0	0	0	0	0.0452386	0.0163084	0.072271	0.0262921	0	0	0	0	0.00122267	0.000440768	0.00195327	0.000710596
492	Vacuolar protein sorting-associated protein 35	IPI00018931	92 kDa	1	1	2	3	18	1	14	2	0.00284107	0.00256786	0.00544588	0.0082194	0.0508935	0.00326168	0.0404718	0.00751202	3.08812e-05	2.79115e-05	5.91944e-05	8.93413e-05	0.00055319	3.54531e-05	0.000439911	8.16524e-05
493	Isoform A of Ras GTPase-activating protein-binding protein 2	IPI00009057	54 kDa	8	8	3	6	8	1	14	0	0.0227286	0.0205428	0.00816882	0.0164388	0.0226193	0.00326168	0.0404718	0	0.000420899	0.000380423	0.000151274	0.000304422	0.000418876	6.04016e-05	0.000749478	0
494	Small nuclear ribonucleoprotein F	IPI00220528	10 kDa	4	4	5	3	4	4	13	4	0.0113643	0.0102714	0.0136147	0.0082194	0.0113097	0.0130467	0.0375809	0.015024	0.00113643	0.00102714	0.00136147	0.00082194	0.00113097	0.00130467	0.00375809	0.0015024
495	MHC class I antigen	IPI00952714	40 kDa	0	0	1	0	42	16	44	17	0	0	0.00272294	0	0.118751	0.052187	0.127197	0.0638522	0	0	6.80735e-05	0	0.00296879	0.00130467	0.00317993	0.0015963
496	Proteasome subunit alpha type-5	IPI00291922	26 kDa	0	1	0	0	16	2	12	2	0	0.00256786	0	0	0.0452386	0.00652337	0.0346901	0.00751202	0	9.87637e-05	0	0	0.00173995	0.000250899	0.00133423	0.000288924
497	Isoform 1 of Serine/arginine repetitive matrix protein 2	IPI00782992	300 kDa	0	0	0	0	5	9	2	4	0	0	0	0	0.0141371	0.0293552	0.00578168	0.015024	0	0	0	0	4.71236e-05	9.78505e-05	1.92723e-05	5.00801e-05
498	Isoform HMG-I of High mobility group protein HMG-I/HMG-Y	IPI00179700	12 kDa	4	5	7	8	0	0	0	1	0.0113643	0.0128393	0.0190606	0.0219184	0	0	0	0.00375601	0.000947024	0.00106994	0.00158838	0.00182653	0	0	0	0.000313001
499	NAD(P)H dehydrogenase [quinone] 1	IPI00012069	31 kDa	0	2	1	1	10	1	13	0	0	0.00513571	0.00272294	0.0027398	0.0282741	0.00326168	0.0375809	0	0	0.000165668	8.78368e-05	8.83807e-05	0.000912069	0.000105216	0.00121229	0
500	Transmembrane protein 119	IPI00296147	29 kDa	0	0	0	0	11	7	12	7	0	0	0	0	0.0311016	0.0228318	0.0346901	0.0262921	0	0	0	0	0.00107247	0.000787303	0.00119621	0.000906623
501	Probable dimethyladenosine transferase	IPI00004459	35 kDa	4	4	6	7	0	3	0	2	0.0113643	0.0102714	0.0163376	0.0191786	0	0.00978505	0	0.00751202	0.000324694	0.000293469	0.00046679	0.00054796	0	0.000279573	0	0.000214629
502	Isoform 1 of AP-2 complex subunit mu	IPI00022256	50 kDa	1	0	0	1	8	2	14	4	0.00284107	0	0	0.0027398	0.0226193	0.00652337	0.0404718	0.015024	5.68214e-05	0	0	5.4796e-05	0.000452386	0.000130467	0.000809436	0.000300481
503	Isoform 1 of Proteasome subunit alpha type-7	IPI00024175	28 kDa	0	1	0	1	19	2	11	1	0	0.00256786	0	0.0027398	0.0537209	0.00652337	0.0317993	0.00375601	0	9.17091e-05	0	9.785e-05	0.0019186	0.000232977	0.00113569	0.000134143
504	Plastin-3	IPI00216694	71 kDa	1	3	11	17	0	0	0	0	0.00284107	0.00770357	0.0299523	0.0465766	0	0	0	0	4.00151e-05	0.000108501	0.000421864	0.000656009	0	0	0	0
505	Casein kinase II subunit alpha'	IPI00020602	41 kDa	0	0	0	0	7	6	12	3	0	0	0	0	0.0197919	0.0195701	0.0346901	0.011268	0	0	0	0	0.000482729	0.00047732	0.0008461	0.00027483
506	Isoform 2 of Mannan-binding lectin serine protease 1	IPI00290283	82 kDa	0	0	0	0	16	1	17	1	0	0	0	0	0.0452386	0.00326168	0.0491443	0.00375601	0	0	0	0	0.000551691	3.97766e-05	0.000599321	4.5805e-05
507	Transforming growth factor beta-1	IPI00000075	44 kDa	9	6	6	5	4	0	2	0	0.0255696	0.0154071	0.0163376	0.013699	0.0113097	0	0.00578168	0	0.000581128	0.000350162	0.00037131	0.000311341	0.000257038	0	0.000131402	0
508	Isoform 2 of Disabled homolog 2-interacting protein	IPI00646394	118 kDa	6	9	13	12	0	0	0	0	0.0170464	0.0231107	0.0353982	0.0328776	0	0	0	0	0.000144461	0.000195853	0.000299985	0.000278624	0	0	0	0
509	Isoform 2 of Matrilin-2	IPI00168520	105 kDa	4	16	4	7	0	0	0	0	0.0113643	0.0410857	0.0108918	0.0191786	0	0	0	0	0.000108231	0.000391292	0.000103731	0.000182653	0	0	0	0
510	Annexin A5	IPI00329801	36 kDa	1	2	1	3	7	2	11	2	0.00284107	0.00513571	0.00272294	0.0082194	0.0197919	0.00652337	0.0317993	0.00751202	7.89186e-05	0.000142659	7.56372e-05	0.000228317	0.000549775	0.000181205	0.000883313	0.000208667
511	Small nuclear ribonucleoprotein Sm D2	IPI00017963	14 kDa	2	2	4	2	7	7	12	2	0.00568214	0.00513571	0.0108918	0.0054796	0.0197919	0.0228318	0.0346901	0.00751202	0.000405867	0.000366837	0.000777983	0.0003914	0.00141371	0.00163084	0.00247786	0.000536573
512	Apolipoprotein E	IPI00021842	36 kDa	1	0	3	1	8	7	8	13	0.00284107	0	0.00816882	0.0027398	0.0226193	0.0228318	0.0231267	0.0488281	7.89186e-05	0	0.000226912	7.61056e-05	0.000628314	0.000634217	0.000642409	0.00135634
513	Protein FAM180A	IPI00374376	20 kDa	1	2	0	2	9	10	9	8	0.00284107	0.00513571	0	0.0054796	0.0254467	0.0326168	0.0260176	0.0300481	0.000142054	0.000256786	0	0.00027398	0.00127234	0.00163084	0.00130088	0.0015024
514	Cofilin-1	IPI00012011	19 kDa	3	4	2	5	2	1	10	2	0.00852321	0.0102714	0.00544588	0.013699	0.00565483	0.00326168	0.0289084	0.00751202	0.00044859	0.000540601	0.000286625	0.000721	0.000297623	0.000171668	0.0015215	0.000395369
515	Isoform 1 of Heterochromatin protein 1-binding protein 3	IPI00642238	61 kDa	8	7	7	5	1	0	0	0	0.0227286	0.017975	0.0190606	0.013699	0.00282741	0	0	0	0.000372599	0.000294672	0.000312469	0.000224574	4.63511e-05	0	0	0
516	Lysyl oxidase homolog 1	IPI00001597	63 kDa	6	11	7	6	0	0	0	0	0.0170464	0.0282464	0.0190606	0.0164388	0	0	0	0	0.000270578	0.000448356	0.000302549	0.000260933	0	0	0	0
517	Coagulation factor X	IPI00019576	55 kDa	0	0	0	0	10	9	4	9	0	0	0	0	0.0282741	0.0293552	0.0115634	0.0338041	0	0	0	0	0.000514075	0.00053373	0.000210243	0.00061462
518	Isoform 2 of Proteasome subunit alpha type-3	IPI00171199	28 kDa	0	0	0	0	19	0	8	3	0	0	0	0	0.0537209	0	0.0231267	0.011268	0	0	0	0	0.0019186	0	0.000825955	0.00040243
519	Ran GTPase-activating protein 1	IPI00294879	64 kDa	0	0	0	0	9	5	10	4	0	0	0	0	0.0254467	0.0163084	0.0289084	0.015024	0	0	0	0	0.000397605	0.000254819	0.000451694	0.000234751
520	Actin-related protein 2/3 complex subunit 1B	IPI00005160	41 kDa	4	4	1	5	1	4	3	5	0.0113643	0.0102714	0.00272294	0.013699	0.00282741	0.0130467	0.00867253	0.01878	0.000277178	0.000250522	6.64132e-05	0.000334122	6.89613e-05	0.000318213	0.000211525	0.00045805
521	Galectin-3	IPI00465431	26 kDa	6	5	7	5	3	0	2	1	0.0170464	0.0128393	0.0190606	0.013699	0.00848224	0	0.00578168	0.00375601	0.000655632	0.000493818	0.000733099	0.000526885	0.00032624	0	0.000222372	0.000144462
522	60S ribosomal protein L19	IPI00025329	23 kDa	2	1	0	0	8	5	6	10	0.00568214	0.00256786	0	0	0.0226193	0.0163084	0.0173451	0.0375601	0.00024705	0.000111646	0	0	0.000983449	0.000709062	0.000754133	0.00163305
523	Isoform 2 of Tropomyosin alpha-3 chain	IPI00218319	29 kDa	0	5	7	11	38	0	39	4	0	0.0128393	0.0190606	0.0301378	0.107442	0	0.112743	0.015024	0	0.000442734	0.000657262	0.00103923	0.00370489	0	0.00388768	0.00051807
524	Isoform 1 of Rho GTPase-activating protein 24	IPI00166301	84 kDa	1	13	3	14	0	0	0	0	0.00284107	0.0333821	0.00816882	0.0383572	0	0	0	0	3.38223e-05	0.000397406	9.72479e-05	0.000456634	0	0	0	0
525	Putative uncharacterized protein DKFZp451D234	IPI00031583	109 kDa	0	0	0	0	7	2	22	1	0	0	0	0	0.0197919	0.00652337	0.0635985	0.00375601	0	0	0	0	0.000181577	5.98474e-05	0.000583473	3.44588e-05
526	26S protease regulatory subunit 4	IPI00011126	49 kDa	0	0	0	0	13	3	19	3	0	0	0	0	0.0367564	0.00978505	0.054926	0.011268	0	0	0	0	0.00075013	0.000199695	0.00112094	0.00022996
527	Keratin, type II cytoskeletal 6B	IPI00293665	60 kDa	155	217	221	191	201	179	194	207	0.440366	0.557225	0.60177	0.523302	0.56831	0.583842	0.560823	0.777494	0.00733943	0.00928708	0.0100295	0.0087217	0.00947184	0.00973069	0.00934706	0.0129582
528	Isoform 1 of Myosin-Ib	IPI00376344	132 kDa	1	2	1	6	0	4	6	1	0.00284107	0.00513571	0.00272294	0.0164388	0	0.0130467	0.0173451	0.00375601	2.15233e-05	3.89069e-05	2.06283e-05	0.000124536	0	9.88389e-05	0.000131402	2.84546e-05
529	Isoform LpNPI of A disintegrin and metalloproteinase with thrombospondin motifs 2	IPI00030757	135 kDa	5	8	2	3	0	0	0	0	0.0142054	0.0205428	0.00544588	0.0082194	0	0	0	0	0.000105225	0.000152169	4.03399e-05	6.08845e-05	0	0	0	0
530	Syndecan-4	IPI00011564	22 kDa	0	0	0	0	3	12	6	14	0	0	0	0	0.00848224	0.0391402	0.0173451	0.0525841	0	0	0	0	0.000385557	0.0017791	0.000788411	0.00239019
531	Small proline-rich protein 2E	IPI00386597	8 kDa	2	1	4	5	1	3	4	1	0.00568214	0.00256786	0.0108918	0.013699	0.00282741	0.00978505	0.0115634	0.00375601	0.000710268	0.000320982	0.00136147	0.00171238	0.000353427	0.00122313	0.00144542	0.000469501
532	annexin VI isoform 2	IPI00002459	75 kDa	5	8	5	4	4	0	3	0	0.0142054	0.0205428	0.0136147	0.0109592	0.0113097	0	0.00867253	0	0.000189405	0.000273905	0.000181529	0.000146123	0.000150795	0	0.000115634	0
533	Insulin-like growth factor-binding protein 4	IPI00305380	28 kDa	9	6	9	5	0	0	1	0	0.0255696	0.0154071	0.0245065	0.013699	0	0	0.00289084	0	0.000913201	0.000550255	0.000875231	0.00048925	0	0	0.000103244	0
534	Isoform 2 of Cell division control protein 42 homolog	IPI00016786	21 kDa	3	4	2	3	4	3	6	1	0.00852321	0.0102714	0.00544588	0.0082194	0.0113097	0.00978505	0.0173451	0.00375601	0.000405867	0.000489115	0.000259328	0.0003914	0.000538555	0.000465955	0.000825955	0.000178858
535	Ras GTPase-activating-like protein IQGAP1	IPI00009342	189 kDa	1	2	8	19	0	0	1	0	0.00284107	0.00513571	0.0217835	0.0520562	0	0	0.00289084	0	1.50321e-05	2.71731e-05	0.000115257	0.00027543	0	0	1.52955e-05	0
536	Eukaryotic translation initiation factor 3 subunit D	IPI00006181	64 kDa	0	0	0	0	7	4	19	2	0	0	0	0	0.0197919	0.0130467	0.054926	0.00751202	0	0	0	0	0.000309248	0.000203855	0.000858219	0.000117375
537	Stanniocalcin-2	IPI00008780	33 kDa	0	0	0	0	11	5	11	0	0	0	0	0	0.0311016	0.0163084	0.0317993	0	0	0	0	0	0.000942472	0.000494195	0.000963614	0
538	Protein Wnt-2	IPI00015175	40 kDa	2	1	2	0	10	5	8	2	0.00568214	0.00256786	0.00544588	0	0.0282741	0.0163084	0.0231267	0.00751202	0.000142054	6.41964e-05	0.000136147	0	0.000706854	0.000407711	0.000578168	0.0001878
539	Keratin, type II cuticular Hb5	IPI00032541	56 kDa	8	8	15	0	11	30	7	4	0.0227286	0.0205428	0.0408441	0	0.0311016	0.0978505	0.0202359	0.015024	0.000405867	0.000366837	0.000729359	0	0.000555385	0.00174733	0.000361355	0.000268286
540	Isoform 1 of Caprin-1	IPI00783872	78 kDa	0	2	0	0	10	2	15	5	0	0.00513571	0	0	0.0282741	0.00652337	0.0433626	0.01878	0	6.58425e-05	0	0	0.000362489	8.36329e-05	0.000555931	0.00024077
541	Heterogeneous nuclear ribonucleoprotein U-like protein 2	IPI00456887	85 kDa	3	8	0	12	0	1	0	3	0.00852321	0.0205428	0	0.0328776	0	0.00326168	0	0.011268	0.000100273	0.000241681	0	0.000386795	0	3.83728e-05	0	0.000132565
542	Keratin, type II cytoskeletal 71	IPI00061200	57 kDa	36	0	42	56	55	63	55	52	0.102279	0	0.114364	0.153429	0.155508	0.205486	0.158996	0.195312	0.00179436	0	0.00200638	0.00269173	0.00272821	0.00360502	0.00278941	0.00342654
543	Dystonin	IPI00642259	857 kDa	1	6	8	23	0	0	0	0	0.00284107	0.0154071	0.0217835	0.0630154	0	0	0	0	3.31513e-06	1.7978e-05	2.54184e-05	7.35303e-05	0	0	0	0
544	Isoform 1 of Cullin-associated NEDD8-dissociated protein 1	IPI00100160	136 kDa	0	0	0	0	16	4	9	2	0	0	0	0	0.0452386	0.0130467	0.0260176	0.00751202	0	0	0	0	0.000332637	9.59319e-05	0.000191306	5.52354e-05
545	60S acidic ribosomal protein P2	IPI00008529	12 kDa	0	0	0	0	12	2	9	8	0	0	0	0	0.033929	0.00652337	0.0260176	0.0300481	0	0	0	0	0.00282741	0.000543614	0.00216813	0.00250401
546	26S protease regulatory subunit 6A	IPI00018398	49 kDa	0	0	0	0	8	7	13	7	0	0	0	0	0.0226193	0.0228318	0.0375809	0.0262921	0	0	0	0	0.000461619	0.000465955	0.000766958	0.000536573
547	Isoform ASF-1 of Splicing factor, arginine/serine-rich 1	IPI00215884	28 kDa	0	0	0	0	10	2	14	2	0	0	0	0	0.0282741	0.00652337	0.0404718	0.00751202	0	0	0	0	0.00100979	0.000232977	0.00144542	0.000268286
548	Isoform 1 of RuvB-like 1	IPI00021187	50 kDa	0	0	0	0	13	1	14	4	0	0	0	0	0.0367564	0.00326168	0.0404718	0.015024	0	0	0	0	0.000735128	6.52337e-05	0.000809436	0.000300481
549	Eukaryotic translation initiation factor 6	IPI00010105	27 kDa	3	6	3	5	4	2	5	4	0.00852321	0.0154071	0.00816882	0.013699	0.0113097	0.00652337	0.0144542	0.015024	0.000315675	0.000570635	0.000302549	0.000507371	0.000418876	0.000241606	0.000535341	0.000556446
550	Heat shock-related 70 kDa protein 2	IPI00007702	70 kDa	39	48	38	57	0	7	23	9	0.110802	0.123257	0.103472	0.156169	0	0.0228318	0.0664894	0.0338041	0.00158288	0.00176082	0.00147817	0.00223098	0	0.000326168	0.000949848	0.000482916
551	IPI:MAN00000010.0|SWISS-PROT:P00698|LYSC_CHICK Lysozyme C OS=Gallus gallus GN=LYZ PE=1 SV=1	MAN00000010	16 kDa	7	9	6	7	0	0	2	3	0.0198875	0.0231107	0.0163376	0.0191786	0	0	0.00578168	0.011268	0.00124297	0.00144442	0.0010211	0.00119866	0	0	0.000361355	0.000704252
552	Isoform Delta 6 of Calcium/calmodulin-dependent protein kinase type II subunit delta	IPI00172636	54 kDa	0	0	0	1	9	1	6	2	0	0	0	0.0027398	0.0254467	0.00326168	0.0173451	0.00751202	0	0	0	5.07371e-05	0.000471236	6.04016e-05	0.000321205	0.000139111
553	Isoform 2 of Inactive serine protease PAMR1	IPI00064429	82 kDa	9	4	6	4	0	0	0	0	0.0255696	0.0102714	0.0163376	0.0109592	0	0	0	0	0.000311825	0.000125261	0.00019924	0.000133649	0	0	0	0
554	Probable U3 small nucleolar RNA-associated protein 11	IPI00180454	30 kDa	5	2	2	3	1	2	0	1	0.0142054	0.00513571	0.00544588	0.0082194	0.00282741	0.00652337	0	0.00375601	0.000473512	0.00017119	0.000181529	0.00027398	9.42472e-05	0.000217446	0	0.0001252
555	Toll-interacting protein	IPI00100154	30 kDa	0	0	0	0	9	6	14	5	0	0	0	0	0.0254467	0.0195701	0.0404718	0.01878	0	0	0	0	0.000848224	0.000652337	0.00134906	0.000626002
556	COP9 signalosome complex subunit 5	IPI00009958	38 kDa	0	0	0	0	9	4	11	1	0	0	0	0	0.0254467	0.0130467	0.0317993	0.00375601	0	0	0	0	0.000669651	0.000343335	0.000836823	9.88424e-05
557	COP9 signalosome complex subunit 4	IPI00171844	46 kDa	0	0	0	0	8	4	14	4	0	0	0	0	0.0226193	0.0130467	0.0404718	0.015024	0	0	0	0	0.000491724	0.000283625	0.000879821	0.00032661
558	26S proteasome non-ATPase regulatory subunit 7	IPI00019927	37 kDa	0	0	0	0	4	1	13	3	0	0	0	0	0.0113097	0.00326168	0.0375809	0.011268	0	0	0	0	0.000305666	8.81536e-05	0.0010157	0.000304541
559	ATPase ASNA1	IPI00013466	39 kDa	0	0	0	0	10	2	5	3	0	0	0	0	0.0282741	0.00652337	0.0144542	0.011268	0	0	0	0	0.000724978	0.000167266	0.000370621	0.000288924
560	Major prion protein	IPI00022284	28 kDa	4	8	4	7	2	5	1	5	0.0113643	0.0205428	0.0108918	0.0191786	0.00565483	0.0163084	0.00289084	0.01878	0.000405867	0.000733673	0.000388992	0.00068495	0.000201958	0.000582444	0.000103244	0.000670716
561	cDNA FLJ56152, highly similar to Rho guanine nucleotide exchange factor 7	IPI00449906	81 kDa	2	4	6	13	0	0	0	0	0.00568214	0.0102714	0.0163376	0.0356174	0	0	0	0	7.01499e-05	0.000126808	0.000201699	0.000439721	0	0	0	0
562	Barrier-to-autointegration factor	IPI00026087	10 kDa	0	0	0	0	1	8	1	12	0	0	0	0	0.00282741	0.0260935	0.00289084	0.0450721	0	0	0	0	0.000282741	0.00260935	0.000289084	0.00450721
563	Proteasome subunit beta type-2	IPI00028006	23 kDa	0	0	1	0	14	0	11	1	0	0	0.00272294	0	0.0395838	0	0.0317993	0.00375601	0	0	0.000118389	0	0.00172103	0	0.00138258	0.000163305
564	Histone H1.0	IPI00550239	21 kDa	3	4	0	4	5	1	1	1	0.00852321	0.0102714	0	0.0109592	0.0141371	0.00326168	0.00289084	0.00375601	0.000405867	0.000489115	0	0.000521867	0.000673194	0.000155318	0.000137659	0.000178858
565	Coiled-coil-helix-coiled-coil-helix domain-containing protein 1	IPI00060107	13 kDa	4	3	2	1	0	3	1	1	0.0113643	0.00770357	0.00544588	0.0027398	0	0.00978505	0.00289084	0.00375601	0.000874176	0.000592582	0.000418914	0.000210754	0	0.000752697	0.000222372	0.000288924
566	Isoform 1 of A disintegrin and metalloproteinase with thrombospondin motifs 12	IPI00036578	178 kDa	2	2	0	0	6	10	3	3	0.00568214	0.00513571	0	0	0.0169645	0.0326168	0.00867253	0.011268	3.19221e-05	2.88523e-05	0	0	9.53061e-05	0.000183241	4.87221e-05	6.33035e-05
567	Isoform 4 of E3 ubiquitin-protein ligase UBR4	IPI00640981	574 kDa	0	0	0	0	4	5	7	3	0	0	0	0	0.0113097	0.0163084	0.0202359	0.011268	0	0	0	0	1.97032e-05	2.84119e-05	3.52542e-05	1.96307e-05
568	173 kDa protein	IPI00220249	173 kDa	4	8	1	2	0	0	0	0	0.0113643	0.0205428	0.00272294	0.0054796	0	0	0	0	6.56895e-05	0.000118745	1.57395e-05	3.1674e-05	0	0	0	0
569	Isoform 3 of LIM domain only protein 7	IPI00291802	154 kDa	0	8	1	15	0	0	0	0	0	0.0205428	0.00272294	0.041097	0	0	0	0	0	0.000133395	1.76814e-05	0.000266864	0	0	0	0
570	Isoform XB of Plasma membrane calcium-transporting ATPase 4	IPI00217169	134 kDa	0	0	0	0	5	0	16	7	0	0	0	0	0.0141371	0	0.0462535	0.0262921	0	0	0	0	0.000105501	0	0.000345175	0.000196209
571	Profilin-1	IPI00216691	15 kDa	2	1	2	4	4	2	5	2	0.00568214	0.00256786	0.00544588	0.0109592	0.0113097	0.00652337	0.0144542	0.00751202	0.000378809	0.00017119	0.000363059	0.000730614	0.000753977	0.000434891	0.000963614	0.000500801
572	Small nuclear ribonucleoprotein E	IPI00029266	11 kDa	1	0	2	2	1	1	5	8	0.00284107	0	0.00544588	0.0054796	0.00282741	0.00326168	0.0144542	0.0300481	0.000258279	0	0.00049508	0.000498146	0.000257038	0.000296517	0.00131402	0.00273164
573	COP9 signalosome complex subunit 8	IPI00009480	23 kDa	0	0	1	0	9	6	11	4	0	0	0.00272294	0	0.0254467	0.0195701	0.0317993	0.015024	0	0	0.000118389	0	0.00110638	0.000850874	0.00138258	0.000653219
574	Isoform 1 of Protein SET	IPI00072377	33 kDa	0	0	0	0	4	3	7	8	0	0	0	0	0.0113097	0.00978505	0.0202359	0.0300481	0	0	0	0	0.000342717	0.000296517	0.000613209	0.000910548
575	Isoform 1 of AP-3 complex subunit beta-1	IPI00021129	121 kDa	0	0	0	0	9	1	6	3	0	0	0	0	0.0254467	0.00326168	0.0173451	0.011268	0	0	0	0	0.000210304	2.69561e-05	0.000143348	9.31242e-05
576	Isoform 1 of Tenascin	IPI00031008	241 kDa	1322	1141	1271	1000	0	0	0	0	3.7559	2.92992	3.46086	2.7398	0	0	0	0	0.0155846	0.0121574	0.0143604	0.0113685	0	0	0	0
577	Isoform 1 of 26S protease regulatory subunit 6B	IPI00020042	47 kDa	0	0	0	0	6	0	11	0	0	0	0	0	0.0169645	0	0.0317993	0	0	0	0	0	0.000360947	0	0.00067658	0
578	Isoform 3 of 4F2 cell-surface antigen heavy chain	IPI00554722	62 kDa	0	0	0	0	10	0	13	2	0	0	0	0	0.0282741	0	0.0375809	0.00751202	0	0	0	0	0.000456035	0	0.000606144	0.000121162
579	T-complex protein 1 subunit epsilon	IPI00010720	60 kDa	0	0	0	0	6	0	10	1	0	0	0	0	0.0169645	0	0.0289084	0.00375601	0	0	0	0	0.000282741	0	0.000481807	6.26002e-05
580	Mucin 5AC, oligomeric mucus/gel-forming	IPI00918002	649 kDa	0	23	0	0	1	0	0	0	0	0.0590607	0	0	0.00282741	0	0	0	0	9.10026e-05	0	0	4.35657e-06	0	0	0
581	Transgelin-2	IPI00550363	22 kDa	5	5	4	5	3	1	4	3	0.0142054	0.0128393	0.0108918	0.013699	0.00848224	0.00326168	0.0115634	0.011268	0.000645698	0.000583604	0.00049508	0.000622682	0.000385557	0.000148258	0.000525608	0.000512183
582	Isoform 1 of F-actin-capping protein subunit beta	IPI00026185	31 kDa	2	2	2	4	7	1	6	0	0.00568214	0.00513571	0.00544588	0.0109592	0.0197919	0.00326168	0.0173451	0	0.000183295	0.000165668	0.000175674	0.000353523	0.000638448	0.000105216	0.000559518	0
583	Activated RNA polymerase II transcriptional coactivator p15	IPI00221222	14 kDa	0	0	0	1	6	3	4	2	0	0	0	0.0027398	0.0169645	0.00978505	0.0115634	0.00751202	0	0	0	0.0001957	0.00121175	0.000698932	0.000825955	0.000536573
584	5'-nucleotidase	IPI00009456	63 kDa	0	7	2	1	8	2	4	0	0	0.017975	0.00544588	0.0027398	0.0226193	0.00652337	0.0115634	0	0	0.000285317	8.64426e-05	4.34889e-05	0.000359037	0.000103546	0.000183546	0
585	Proteasome subunit beta type-4	IPI00555956	29 kDa	0	0	0	0	12	1	11	2	0	0	0	0	0.033929	0.00326168	0.0317993	0.00751202	0	0	0	0	0.00116996	0.000112472	0.00109653	0.000259035
586	Isoform 3 of Ribosome-binding protein 1	IPI00215743	152 kDa	0	0	1	0	3	8	5	9	0	0	0.00272294	0	0.00848224	0.0260935	0.0144542	0.0338041	0	0	1.79141e-05	0	5.58042e-05	0.000171668	9.50935e-05	0.000222395
587	Alpha-crystallin B chain	IPI00021369	20 kDa	3	0	0	0	7	0	13	3	0.00852321	0	0	0	0.0197919	0	0.0375809	0.011268	0.000426161	0	0	0	0.000989595	0	0.00187905	0.000563401
588	T-complex protein 1 subunit zeta	IPI00027626	58 kDa	0	1	0	0	7	0	10	3	0	0.00256786	0	0	0.0197919	0	0.0289084	0.011268	0	4.42734e-05	0	0	0.00034124	0	0.000498421	0.000194276
589	Prostaglandin E synthase 3	IPI00015029	19 kDa	0	0	0	0	5	3	8	1	0	0	0	0	0.0141371	0.00978505	0.0231267	0.00375601	0	0	0	0	0.000744056	0.000515003	0.0012172	0.000197685
590	Isoform alpha-enolase of Alpha-enolase	IPI00465248	47 kDa	3	4	4	6	1	1	0	3	0.00852321	0.0102714	0.0108918	0.0164388	0.00282741	0.00326168	0	0.011268	0.000181345	0.000218541	0.00023174	0.000349762	6.01578e-05	6.93976e-05	0	0.000239745
591	Isoform 2 of Glutaminyl-peptide cyclotransferase-like protein	IPI00014877	43 kDa	7	3	4	3	1	2	0	3	0.0198875	0.00770357	0.0108918	0.0082194	0.00282741	0.00652337	0	0.011268	0.0004625	0.000179153	0.000253297	0.000191149	6.57538e-05	0.000151706	0	0.000262047
592	51 kDa protein	IPI00033025	51 kDa	0	4	1	4	4	0	7	0	0	0.0102714	0.00272294	0.0109592	0.0113097	0	0.0202359	0	0	0.0002014	5.3391e-05	0.000214886	0.000221758	0	0.000396782	0
593	Histone H1x	IPI00021924	22 kDa	7	5	3	4	1	1	1	1	0.0198875	0.0128393	0.00816882	0.0109592	0.00282741	0.00326168	0.00289084	0.00375601	0.000903977	0.000583604	0.00037131	0.000498146	0.000128519	0.000148258	0.000131402	0.000170728
594	Heterogeneous nuclear ribonucleoprotein H	IPI00013881	49 kDa	3	2	3	1	1	0	3	8	0.00852321	0.00513571	0.00816882	0.0027398	0.00282741	0	0.00867253	0.0300481	0.000173943	0.00010481	0.000166711	5.59143e-05	5.77023e-05	0	0.00017699	0.000613226
595	Glutathione S-transferase P	IPI00219757	23 kDa	2	3	2	1	5	3	10	2	0.00568214	0.00770357	0.00544588	0.0027398	0.0141371	0.00978505	0.0289084	0.00751202	0.00024705	0.000334938	0.000236777	0.000119122	0.000614655	0.000425437	0.00125689	0.00032661
596	14-3-3 protein eta	IPI00216319	28 kDa	3	5	6	5	18	0	5	1	0.00852321	0.0128393	0.0163376	0.013699	0.0508935	0	0.0144542	0.00375601	0.0003044	0.000458546	0.000583487	0.00048925	0.00181762	0	0.000516222	0.000134143
597	Neurotrypsin	IPI00011063	97 kDa	6	10	0	1	1	3	0	0	0.0170464	0.0256786	0	0.0027398	0.00282741	0.00978505	0	0	0.000175736	0.000264727	0	2.82454e-05	2.91486e-05	0.000100877	0	0
598	Coronin-1C_i3 protein	IPI00867509	59 kDa	3	4	3	3	1	0	3	0	0.00852321	0.0102714	0.00816882	0.0082194	0.00282741	0	0.00867253	0	0.000144461	0.000174092	0.000138455	0.000139312	4.79223e-05	0	0.000146992	0
599	Activator of basal transcription 1	IPI00002938	31 kDa	8	3	6	5	0	1	0	0	0.0227286	0.00770357	0.0163376	0.013699	0	0.00326168	0	0	0.000733179	0.000248502	0.000527021	0.000441903	0	0.000105216	0	0
600	Isoform 1 of Liprin-alpha-1	IPI00163496	136 kDa	0	4	5	10	0	0	0	1	0	0.0102714	0.0136147	0.027398	0	0	0	0.00375601	0	7.55252e-05	0.000100108	0.000201456	0	0	0	2.76177e-05
601	Isoform 1 of Rho GTPase-activating protein 22	IPI00644736	77 kDa	1	9	2	8	0	0	0	0	0.00284107	0.0231107	0.00544588	0.0219184	0	0	0	0	3.6897e-05	0.000300139	7.07257e-05	0.000284655	0	0	0	0
602	26S proteasome non-ATPase regulatory subunit 12	IPI00185374	53 kDa	0	0	0	0	6	0	11	1	0	0	0	0	0.0169645	0	0.0317993	0.00375601	0	0	0	0	0.000320085	0	0.000599986	7.08681e-05
603	Isoform 1 of Endosialin	IPI00006971	81 kDa	0	0	0	0	10	0	9	0	0	0	0	0	0.0282741	0	0.0260176	0	0	0	0	0	0.000349064	0	0.000321205	0
604	cDNA FLJ59211, highly similar to Glucosidase 2 subunit beta	IPI00026154	60 kDa	0	0	0	0	10	0	9	1	0	0	0	0	0.0282741	0	0.0260176	0.00375601	0	0	0	0	0.000471236	0	0.000433626	6.26002e-05
605	Protein disulfide-isomerase A4	IPI00009904	73 kDa	0	0	0	0	17	0	11	0	0	0	0	0	0.048066	0	0.0317993	0	0	0	0	0	0.000658439	0	0.000435606	0
606	Actin-related protein 2/3 complex subunit 4	IPI00554811	20 kDa	4	4	3	3	2	4	4	3	0.0113643	0.0102714	0.00816882	0.0082194	0.00565483	0.0130467	0.0115634	0.011268	0.000568214	0.000513571	0.000408441	0.00041097	0.000282741	0.000652337	0.000578168	0.000563401
607	F-actin-capping protein subunit alpha-1	IPI00005969	33 kDa	2	4	1	4	4	1	9	3	0.00568214	0.0102714	0.00272294	0.0109592	0.0113097	0.00326168	0.0260176	0.011268	0.000172186	0.000311255	8.25134e-05	0.000332097	0.000342717	9.88389e-05	0.000788411	0.000341455
608	Isoform A1-B of Heterogeneous nuclear ribonucleoprotein A1	IPI00215965	39 kDa	4	4	1	6	2	2	1	6	0.0113643	0.0102714	0.00272294	0.0164388	0.00565483	0.00652337	0.00289084	0.0225361	0.000291392	0.00026337	6.9819e-05	0.000421508	0.000144996	0.000167266	7.41241e-05	0.000577848
609	Isoform 2 of Keratin, type II cytoskeletal 80	IPI00431749	47 kDa	7	7	13	19	11	5	4	11	0.0198875	0.017975	0.0353982	0.0520562	0.0311016	0.0163084	0.0115634	0.0413161	0.000423138	0.000382447	0.000753154	0.00110758	0.000661735	0.000346988	0.000246029	0.000879066
610	Eukaryotic translation initiation factor 2 subunit 1	IPI00219678	36 kDa	6	1	4	3	3	0	3	0	0.0170464	0.00256786	0.0108918	0.0082194	0.00848224	0	0.00867253	0	0.000473512	7.13293e-05	0.000302549	0.000228317	0.000235618	0	0.000240903	0
611	Isoform 2 of Pleckstrin homology-like domain family B member 2	IPI00168459	137 kDa	1	4	0	5	0	2	0	6	0.00284107	0.0102714	0	0.013699	0	0.00652337	0	0.0225361	2.07377e-05	7.49739e-05	0	9.99927e-05	0	4.76158e-05	0	0.000164497
612	Dihydropyrimidinase-related protein 2	IPI00257508	62 kDa	1	2	2	2	4	0	10	0	0.00284107	0.00513571	0.00544588	0.0054796	0.0113097	0	0.0289084	0	4.58237e-05	8.28341e-05	8.78368e-05	8.83807e-05	0.000182414	0	0.000466265	0
613	Vacuolar protein sorting-associated protein 26A	IPI00411426	38 kDa	2	0	1	0	11	1	8	1	0.00568214	0	0.00272294	0	0.0311016	0.00326168	0.0231267	0.00375601	0.00014953	0	7.16563e-05	0	0.000818462	8.58338e-05	0.000608598	9.88424e-05
614	Probable ATP-dependent RNA helicase DDX5	IPI00017617	69 kDa	5	10	2	8	0	0	0	0	0.0142054	0.0256786	0.00544588	0.0219184	0	0	0	0	0.000205875	0.000372153	7.89258e-05	0.000317658	0	0	0	0
615	Eukaryotic translation initiation factor 3 subunit I	IPI00012795	37 kDa	0	0	0	0	5	2	11	7	0	0	0	0	0.0141371	0.00652337	0.0317993	0.0262921	0	0	0	0	0.000382083	0.000176307	0.000859439	0.000710596
616	Isoform Alpha-3A of Integrin alpha-3	IPI00215995	117 kDa	0	2	5	0	4	2	7	3	0	0.00513571	0.0136147	0	0.0113097	0.00652337	0.0202359	0.011268	0	4.3895e-05	0.000116365	0	9.66637e-05	5.57553e-05	0.000172956	9.63079e-05
617	Casein kinase II subunit beta	IPI00010865	25 kDa	0	0	0	0	7	4	4	4	0	0	0	0	0.0197919	0.0130467	0.0115634	0.015024	0	0	0	0	0.000791676	0.00052187	0.000462535	0.000600962
618	Placenta-specific protein 9	IPI00150349	10 kDa	3	4	4	3	0	0	0	0	0.00852321	0.0102714	0.0108918	0.0082194	0	0	0	0	0.000852321	0.00102714	0.00108918	0.00082194	0	0	0	0
619	Isoform 1 of Probable serine protease HTRA3	IPI00027862	49 kDa	5	9	3	4	0	0	0	0	0.0142054	0.0231107	0.00816882	0.0109592	0	0	0	0	0.000289905	0.000471647	0.000166711	0.000223657	0	0	0	0
620	Isoform 5 of Tenascin	IPI00220214	182 kDa	1215	1029	1152	907	0	0	0	0	3.4519	2.64232	3.13683	2.485	0	0	0	0	0.0189665	0.0145183	0.0172353	0.0136538	0	0	0	0
621	Serine/threonine-protein phosphatase 2A catalytic subunit beta isoform	IPI00429689	36 kDa	0	0	0	0	8	1	13	2	0	0	0	0	0.0226193	0.00326168	0.0375809	0.00751202	0	0	0	0	0.000628314	9.06024e-05	0.00104392	0.000208667
622	Alpha-internexin	IPI00001453	55 kDa	196	154	0	146	0	48	0	0	0.55685	0.39545	0	0.400011	0	0.156561	0	0	0.0101245	0.00719	0	0.00727293	0	0.00284656	0	0
623	Isoform 1 of Tumor susceptibility gene 101 protein	IPI00018434	44 kDa	0	0	0	1	6	0	12	1	0	0	0	0.0027398	0.0169645	0	0.0346901	0.00375601	0	0	0	6.22682e-05	0.000385557	0	0.000788411	8.53639e-05
624	Isoform XB of Tenascin-X	IPI00025276	464 kDa	9	0	7	0	1	0	0	0	0.0255696	0	0.0190606	0	0.00282741	0	0	0	5.5107e-05	0	4.10788e-05	0	6.09357e-06	0	0	0
625	T-complex protein 1 subunit delta	IPI00302927	58 kDa	0	0	0	0	10	0	7	0	0	0	0	0	0.0282741	0	0.0202359	0	0	0	0	0	0.000487485	0	0.000348895	0
626	59 kDa protein	IPI00302925	59 kDa	0	0	0	0	13	0	8	0	0	0	0	0	0.0367564	0	0.0231267	0	0	0	0	0	0.00062299	0	0.000391979	0
627	Isoform 1 of Zinc transporter ZIP14	IPI00014236	54 kDa	0	0	0	0	11	0	16	0	0	0	0	0	0.0311016	0	0.0462535	0	0	0	0	0	0.000575955	0	0.000856546	0
628	Protein transport protein Sec23A	IPI00017375	86 kDa	4	4	4	3	3	0	4	0	0.0113643	0.0102714	0.0108918	0.0082194	0.00848224	0	0.0115634	0	0.000132143	0.000119435	0.000126648	9.55745e-05	9.86307e-05	0	0.000134458	0
629	Gasdermin-A	IPI00166200	49 kDa	0	2	0	2	5	3	2	1	0	0.00513571	0	0.0054796	0.0141371	0.00978505	0.00578168	0.00375601	0	0.00010481	0	0.000111829	0.000288512	0.000199695	0.000117994	7.66533e-05
630	Integrin alpha-2	IPI00013744	129 kDa	2	4	3	11	1	1	0	1	0.00568214	0.0102714	0.00816882	0.0301378	0.00282741	0.00326168	0	0.00375601	4.40476e-05	7.96234e-05	6.33242e-05	0.000233626	2.19179e-05	2.52844e-05	0	2.91164e-05
631	Eukaryotic translation initiation factor 3 subunit K	IPI00033143	25 kDa	0	0	1	0	6	1	9	2	0	0	0.00272294	0	0.0169645	0.00326168	0.0260176	0.00751202	0	0	0.000108918	0	0.00067858	0.000130467	0.0010407	0.000300481
632	Semaphorin-3D	IPI00028213	90 kDa	4	11	2	3	0	0	0	0	0.0113643	0.0282464	0.00544588	0.0082194	0	0	0	0	0.00012627	0.000313849	6.05098e-05	9.13267e-05	0	0	0	0
633	Elastin	IPI00029928	66 kDa	5	10	4	2	0	0	0	0	0.0142054	0.0256786	0.0108918	0.0054796	0	0	0	0	0.000215233	0.000389069	0.000165027	8.30243e-05	0	0	0	0
634	Four and a half LIM domains protein 3	IPI00014399	31 kDa	3	4	8	8	0	0	1	0	0.00852321	0.0102714	0.0217835	0.0219184	0	0	0.00289084	0	0.000274942	0.000331336	0.000702694	0.000707045	0	0	9.3253e-05	0
635	nardilysin isoform a	IPI00243221	139 kDa	0	0	0	0	5	2	7	0	0	0	0	0	0.0141371	0.00652337	0.0202359	0	0	0	0	0	0.000101706	4.69307e-05	0.000145582	0
636	Isoform 4 of Palladin	IPI00383645	73 kDa	1	5	4	7	0	0	0	0	0.00284107	0.0128393	0.0108918	0.0191786	0	0	0	0	3.89188e-05	0.000175881	0.000149202	0.000262721	0	0	0	0
637	Alpha-centractin	IPI00029468	43 kDa	0	0	0	0	6	0	6	0	0	0	0	0	0.0169645	0	0.0173451	0	0	0	0	0	0.000394523	0	0.000403373	0
638	Proteasome subunit alpha type-2	IPI00219622	26 kDa	0	0	0	0	10	1	11	2	0	0	0	0	0.0282741	0.00326168	0.0317993	0.00751202	0	0	0	0	0.00108747	0.000125449	0.00122305	0.000288924
639	Pantetheinase	IPI00030871	57 kDa	0	0	0	0	8	1	14	0	0	0	0	0	0.0226193	0.00326168	0.0404718	0	0	0	0	0	0.00039683	5.72225e-05	0.000710031	0
640	Inter-alpha-trypsin inhibitor heavy chain H2	IPI00305461	106 kDa	0	0	0	0	12	0	7	0	0	0	0	0	0.033929	0	0.0202359	0	0	0	0	0	0.000320085	0	0.000190905	0
641	Calpain-1 catalytic subunit	IPI00011285	82 kDa	2	3	1	2	4	0	8	2	0.00568214	0.00770357	0.00272294	0.0054796	0.0113097	0	0.0231267	0.00751202	6.92944e-05	9.39459e-05	3.32066e-05	6.68244e-05	0.000137923	0	0.000282033	9.161e-05
642	Isoform Long of 14-3-3 protein beta/alpha	IPI00216318	28 kDa	3	7	10	8	23	2	12	3	0.00852321	0.017975	0.0272294	0.0219184	0.0650305	0.00652337	0.0346901	0.011268	0.0003044	0.000641964	0.000972479	0.0007828	0.00232252	0.000232977	0.00123893	0.00040243
643	Probable rRNA-processing protein EBP2	IPI00745955	35 kDa	4	8	3	4	0	1	0	1	0.0113643	0.0205428	0.00816882	0.0109592	0	0.00326168	0	0.00375601	0.000324694	0.000586938	0.000233395	0.00031312	0	9.3191e-05	0	0.000107315
644	Adenine phosphoribosyltransferase	IPI00218693	20 kDa	1	1	0	0	5	1	7	2	0.00284107	0.00256786	0	0	0.0141371	0.00326168	0.0202359	0.00751202	0.000142054	0.000128393	0	0	0.000706854	0.000163084	0.00101179	0.000375601
645	116 kDa U5 small nuclear ribonucleoprotein component	IPI00003519	109 kDa	0	0	0	0	6	2	7	0	0	0	0	0	0.0169645	0.00652337	0.0202359	0	0	0	0	0	0.000155638	5.98474e-05	0.00018565	0
646	Isoform Beta-3A of Integrin beta-3	IPI00303283	87 kDa	5	2	7	7	0	0	0	0	0.0142054	0.00513571	0.0190606	0.0191786	0	0	0	0	0.00016328	5.90312e-05	0.000219087	0.000220444	0	0	0	0
647	cDNA FLJ56561	IPI00749454	87 kDa	0	0	0	0	1	3	2	12	0	0	0	0	0.00282741	0.00978505	0.00578168	0.0450721	0	0	0	0	3.2499e-05	0.000112472	6.64561e-05	0.00051807
648	482 kDa protein	IPI00179298	482 kDa	0	0	0	0	6	1	12	0	0	0	0	0	0.0169645	0.00326168	0.0346901	0	0	0	0	0	3.5196e-05	6.76698e-06	7.19712e-05	0
649	Isoform 1 of Pinin	IPI00789041	82 kDa	0	0	0	0	5	8	0	3	0	0	0	0	0.0141371	0.0260935	0	0.011268	0	0	0	0	0.000172403	0.000318213	0	0.000137415
650	SPARC	IPI00014572	35 kDa	0	0	0	0	11	0	9	0	0	0	0	0	0.0311016	0	0.0260176	0	0	0	0	0	0.000888616	0	0.000743359	0
651	Peroxisomal multifunctional enzyme type 2	IPI00019912	80 kDa	0	25	0	0	0	0	0	0	0	0.0641964	0	0	0	0	0	0	0	0.000802455	0	0	0	0	0	0
652	Isoform 1 of Nucleolar protein 7	IPI00007729	29 kDa	3	6	4	6	1	2	0	0	0.00852321	0.0154071	0.0108918	0.0164388	0.00282741	0.00652337	0	0	0.000293904	0.00053128	0.000375578	0.000566855	9.74971e-05	0.000224944	0	0
653	ADP/ATP translocase 2	IPI00007188	33 kDa	4	3	2	0	1	0	0	6	0.0113643	0.00770357	0.00544588	0	0.00282741	0	0	0.0225361	0.000344372	0.000233441	0.000165027	0	8.56792e-05	0	0	0.000682911
654	Isoform 1 of 6-phosphofructokinase, liver type	IPI00332371	85 kDa	0	1	1	0	5	0	8	2	0	0.00256786	0.00272294	0	0.0141371	0	0.0231267	0.00751202	0	3.02101e-05	3.20346e-05	0	0.000166319	0	0.000272079	8.83767e-05
655	28S ribosomal protein S12, mitochondrial	IPI00005692	15 kDa	0	1	0	1	1	2	2	0	0	0.00256786	0	0.0027398	0.00282741	0.00652337	0.00578168	0	0	0.00017119	0	0.000182653	0.000188494	0.000434891	0.000385446	0
656	Isoform Alpha of Caveolin-1	IPI00009236	20 kDa	2	0	2	2	3	1	6	0	0.00568214	0	0.00544588	0.0054796	0.00848224	0.00326168	0.0173451	0	0.000284107	0	0.000272294	0.00027398	0.000424112	0.000163084	0.000867253	0
657	LOR protein	IPI00011673	26 kDa	0	0	1	0	3	1	8	0	0	0	0.00272294	0	0.00848224	0.00326168	0.0231267	0	0	0	0.000104728	0	0.00032624	0.000125449	0.00088949	0
658	Isoform 1 of Lysine-specific demethylase NO66	IPI00002879	71 kDa	5	3	7	2	0	0	0	0	0.0142054	0.00770357	0.0190606	0.0054796	0	0	0	0	0.000200075	0.000108501	0.000268459	7.71775e-05	0	0	0	0
659	Procollagen-lysine,2-oxoglutarate 5-dioxygenase 3	IPI00030255	85 kDa	1	7	1	7	0	0	0	0	0.00284107	0.017975	0.00272294	0.0191786	0	0	0	0	3.34244e-05	0.00021147	3.20346e-05	0.000225631	0	0	0	0
660	D-3-phosphoglycerate dehydrogenase	IPI00011200	57 kDa	1	3	0	0	0	1	8	1	0.00284107	0.00770357	0	0	0	0.00326168	0.0231267	0.00375601	4.98433e-05	0.00013515	0	0	0	5.72225e-05	0.000405732	6.58949e-05
661	Proteasome subunit beta type-3	IPI00028004	23 kDa	0	0	0	0	13	2	8	1	0	0	0	0	0.0367564	0.00652337	0.0231267	0.00375601	0	0	0	0	0.0015981	0.000283625	0.00100551	0.000163305
662	H/ACA ribonucleoprotein complex subunit 3	IPI00032853	8 kDa	3	2	3	1	1	3	3	2	0.00852321	0.00513571	0.00816882	0.0027398	0.00282741	0.00978505	0.00867253	0.00751202	0.0010654	0.000641964	0.0010211	0.000342475	0.000353427	0.00122313	0.00108407	0.000939002
663	Coiled-coil domain-containing protein 137	IPI00401962	33 kDa	2	1	1	1	1	5	1	1	0.00568214	0.00256786	0.00272294	0.0027398	0.00282741	0.0163084	0.00289084	0.00375601	0.000172186	7.78138e-05	8.25134e-05	8.30243e-05	8.56792e-05	0.000494195	8.76013e-05	0.000113818
664	Putative uncharacterized protein COL5A1	IPI00552815	24 kDa	7	8	4	13	8	0	16	2	0.0198875	0.0205428	0.0108918	0.0356174	0.0226193	0	0.0462535	0.00751202	0.000828646	0.000855952	0.000453823	0.00148406	0.000942472	0	0.00192723	0.000313001
665	Ribosome biogenesis protein BRX1 homolog	IPI00181728	41 kDa	3	7	1	2	0	2	1	0	0.00852321	0.017975	0.00272294	0.0054796	0	0.00652337	0.00289084	0	0.000207883	0.000438414	6.64132e-05	0.000133649	0	0.000159107	7.05083e-05	0
666	Collagen alpha-3(V) chain	IPI00018279	172 kDa	1	3	3	2	2	0	6	0	0.00284107	0.00770357	0.00816882	0.0054796	0.00565483	0	0.0173451	0	1.65179e-05	4.47882e-05	4.74932e-05	3.18582e-05	3.28769e-05	0	0.000100843	0
667	Cysteine and glycine-rich protein 1	IPI00442073	21 kDa	2	5	5	6	0	2	2	0	0.00568214	0.0128393	0.0136147	0.0164388	0	0.00652337	0.00578168	0	0.000270578	0.000611394	0.000648319	0.0007828	0	0.000310637	0.000275318	0
668	Ribosomal RNA processing protein 1 homolog A	IPI00550766	53 kDa	2	5	4	6	0	0	0	0	0.00568214	0.0128393	0.0108918	0.0164388	0	0	0	0	0.00010721	0.000242251	0.000205505	0.000310166	0	0	0	0
669	NOP2 protein	IPI00654555	93 kDa	3	9	2	8	0	0	0	0	0.00852321	0.0231107	0.00544588	0.0219184	0	0	0	0	9.16474e-05	0.000248502	5.85579e-05	0.000235682	0	0	0	0
670	EH domain-containing protein 1	IPI00017184	61 kDa	0	0	0	0	7	0	11	2	0	0	0	0	0.0197919	0	0.0317993	0.00751202	0	0	0	0	0.000324457	0	0.000521299	0.000123148
671	Charged multivesicular body protein 2a	IPI00004416	25 kDa	1	0	0	0	2	0	11	0	0.00284107	0	0	0	0.00565483	0	0.0317993	0	0.000113643	0	0	0	0.000226193	0	0.00127197	0
672	Muscle type neuropilin 1	IPI00165438	72 kDa	0	0	0	0	43	80	54	55	0	0	0	0	0.121579	0.260935	0.156105	0.206581	0	0	0	0	0.00168859	0.00362409	0.00216813	0.00286917
673	Macrophage migration inhibitory factor	IPI00293276	12 kDa	3	3	3	4	1	1	1	1	0.00852321	0.00770357	0.00816882	0.0109592	0.00282741	0.00326168	0.00289084	0.00375601	0.000710268	0.000641964	0.000680735	0.000913267	0.000235618	0.000271807	0.000240903	0.000313001
674	Isoform 1 of Signal recognition particle 68 kDa protein	IPI00168388	71 kDa	1	6	2	2	3	0	2	3	0.00284107	0.0154071	0.00544588	0.0054796	0.00848224	0	0.00578168	0.011268	4.00151e-05	0.000217002	7.67026e-05	7.71775e-05	0.000119468	0	8.14322e-05	0.000158705
675	Protein S100-A7	IPI00219806	11 kDa	1	0	1	4	1	2	1	1	0.00284107	0	0.00272294	0.0109592	0.00282741	0.00652337	0.00289084	0.00375601	0.000258279	0	0.00024754	0.000996291	0.000257038	0.000593034	0.000262804	0.000341455
676	Alpha-2-macroglobulin	IPI00478003	163 kDa	0	3	1	1	5	0	3	1	0	0.00770357	0.00272294	0.0027398	0.0141371	0	0.00867253	0.00375601	0	4.72611e-05	1.67052e-05	1.68086e-05	8.67305e-05	0	5.32057e-05	2.3043e-05
677	CD59 glycoprotein	IPI00011302	14 kDa	0	1	1	0	6	2	7	0	0	0.00256786	0.00272294	0	0.0169645	0.00652337	0.0202359	0	0	0.000183418	0.000194496	0	0.00121175	0.000465955	0.00144542	0
678	Nucleolar complex protein 4 homolog	IPI00031661	58 kDa	1	7	2	3	0	0	0	0	0.00284107	0.017975	0.00544588	0.0082194	0	0	0	0	4.8984e-05	0.000309914	9.38945e-05	0.000141714	0	0	0	0
679	Proteasome subunit beta type-6	IPI00000811	25 kDa	0	0	2	0	9	0	4	3	0	0	0.00544588	0	0.0254467	0	0.0115634	0.011268	0	0	0.000217835	0	0.00101787	0	0.000462535	0.000450721
680	Isoform 3 of Tropomyosin alpha-1 chain	IPI00216135	33 kDa	0	3	7	11	46	0	40	0	0	0.00770357	0.0190606	0.0301378	0.130061	0	0.115634	0	0	0.000233441	0.000577593	0.000913267	0.00394124	0	0.00350405	0
681	Isoform 2 of Protein enabled homolog	IPI00374054	64 kDa	1	1	4	7	0	0	0	0	0.00284107	0.00256786	0.0108918	0.0191786	0	0	0	0	4.43917e-05	4.01227e-05	0.000170184	0.000299666	0	0	0	0
682	Hsc70-interacting protein	IPI00032826	41 kDa	0	0	0	0	6	0	7	2	0	0	0	0	0.0169645	0	0.0202359	0.00751202	0	0	0	0	0.000413768	0	0.000493558	0.00018322
683	Guanine nucleotide-binding protein G(I)/G(S)/G(T) subunit beta-1	IPI00026268	37 kDa	7	3	4	7	7	0	9	0	0.0198875	0.00770357	0.0108918	0.0191786	0.0197919	0	0.0260176	0	0.0005375	0.000208205	0.000294372	0.000518341	0.000534916	0	0.000703178	0
684	Copine-1	IPI00018452	59 kDa	3	5	1	3	0	0	4	0	0.00852321	0.0128393	0.00272294	0.0082194	0	0	0.0115634	0	0.000144461	0.000217615	4.61515e-05	0.000139312	0	0	0.000195989	0
685	Probable ATP-dependent RNA helicase DDX27	IPI00293078	90 kDa	3	5	2	5	0	0	0	0	0.00852321	0.0128393	0.00544588	0.013699	0	0	0	0	9.47024e-05	0.000142659	6.05098e-05	0.000152211	0	0	0	0
686	Vacuolar protein sorting-associated protein 28 homolog	IPI00007155	25 kDa	1	1	0	0	3	1	10	2	0.00284107	0.00256786	0	0	0.00848224	0.00326168	0.0289084	0.00751202	0.000113643	0.000102714	0	0	0.00033929	0.000130467	0.00115634	0.000300481
687	Isoform 1 of Uncharacterized protein KIAA0802	IPI00792611	210 kDa	1	6	1	3	0	0	0	0	0.00284107	0.0154071	0.00272294	0.0082194	0	0	0	0	1.35289e-05	7.33673e-05	1.29664e-05	3.914e-05	0	0	0	0
688	Synaptic vesicle membrane protein VAT-1 homolog	IPI00156689	42 kDa	0	1	0	0	5	2	5	0	0	0.00256786	0	0	0.0141371	0.00652337	0.0144542	0	0	6.11394e-05	0	0	0.000336597	0.000155318	0.000344148	0
689	Lysyl oxidase homolog 4	IPI00306402	84 kDa	5	4	5	4	0	0	0	0	0.0142054	0.0102714	0.0136147	0.0109592	0	0	0	0	0.000169111	0.000122279	0.00016208	0.000130467	0	0	0	0
690	Isoform 1 of ADAMTS-like protein 4	IPI00374068	117 kDa	2	6	3	2	0	0	0	0	0.00568214	0.0154071	0.00816882	0.0054796	0	0	0	0	4.85653e-05	0.000131685	6.9819e-05	4.68342e-05	0	0	0	0
691	Isoform 1 of Fibulin-7	IPI00167710	47 kDa	3	7	3	2	0	0	0	0	0.00852321	0.017975	0.00816882	0.0054796	0	0	0	0	0.000181345	0.000382447	0.000173805	0.000116587	0	0	0	0
692	Midkine	IPI00010333	16 kDa	2	6	3	2	0	2	2	0	0.00568214	0.0154071	0.00816882	0.0054796	0	0.00652337	0.00578168	0	0.000355134	0.000962946	0.000510551	0.000342475	0	0.000407711	0.000361355	0
693	Protein flightless-1 homolog	IPI00031023	145 kDa	0	0	0	0	3	3	4	1	0	0	0	0	0.00848224	0.00978505	0.0115634	0.00375601	0	0	0	0	5.84982e-05	6.74831e-05	7.97474e-05	2.59035e-05
694	Isoform 1 of Nucleolar RNA helicase 2	IPI00015953	87 kDa	7	5	6	1	0	0	0	0	0.0198875	0.0128393	0.0163376	0.0027398	0	0	0	0	0.000228592	0.000147578	0.000187789	3.1492e-05	0	0	0	0
695	ATP-binding cassette sub-family A member 1	IPI00293460	254 kDa	0	0	0	0	1	7	0	5	0	0	0	0	0.00282741	0.0228318	0	0.01878	0	0	0	0	1.11316e-05	8.9889e-05	0	7.39372e-05
696	SHC SH2 domain-binding protein 1	IPI00168691	76 kDa	0	17	0	0	0	0	0	0	0	0.0436535	0	0	0	0	0	0	0	0.000574389	0	0	0	0	0	0
697	Cytochrome b-c1 complex subunit 8	IPI00024742	10 kDa	1	0	2	0	2	2	2	3	0.00284107	0	0.00544588	0	0.00565483	0.00652337	0.00578168	0.011268	0.000284107	0	0.000544588	0	0.000565483	0.000652337	0.000578168	0.0011268
698	60S ribosomal protein L37	IPI00220871	11 kDa	0	0	1	0	3	0	1	0	0	0	0.00272294	0	0.00848224	0	0.00289084	0	0	0	0.00024754	0	0.000771113	0	0.000262804	0
699	Signal recognition particle 19 kDa protein	IPI00295889	16 kDa	1	1	1	1	6	2	3	1	0.00284107	0.00256786	0.00272294	0.0027398	0.0169645	0.00652337	0.00867253	0.00375601	0.000177567	0.000160491	0.000170184	0.000171238	0.00106028	0.000407711	0.000542033	0.000234751
700	DnaJ homolog subfamily A member 1	IPI00012535	45 kDa	1	0	1	0	5	2	4	3	0.00284107	0	0.00272294	0	0.0141371	0.00652337	0.0115634	0.011268	6.31349e-05	0	6.05098e-05	0	0.000314157	0.000144964	0.000256964	0.000250401
701	Ras-related protein Rap-1b	IPI00015148	21 kDa	6	11	17	11	3	2	11	1	0.0170464	0.0282464	0.04629	0.0301378	0.00848224	0.00652337	0.0317993	0.00375601	0.000811734	0.00134507	0.00220429	0.00143513	0.000403916	0.000310637	0.00151425	0.000178858
702	Flotillin-1	IPI00027438	47 kDa	0	2	0	5	5	1	5	0	0	0.00513571	0	0.013699	0.0141371	0.00326168	0.0144542	0	0	0.00010927	0	0.000291468	0.000300789	6.93976e-05	0.000307536	0
703	cDNA FLJ54957, highly similar to Transketolase	IPI00643920	69 kDa	2	5	3	6	0	1	0	0	0.00568214	0.0128393	0.00816882	0.0164388	0	0.00326168	0	0	8.23499e-05	0.000186076	0.000118389	0.000238244	0	4.72708e-05	0	0
704	alpha-2-glycoprotein 1, zinc precursor	IPI00166729	34 kDa	0	2	2	0	1	3	0	0	0	0.00513571	0.00544588	0	0.00282741	0.00978505	0	0	0	0.00015105	0.000160173	0	8.31593e-05	0.000287796	0	0
705	Angiopoietin-1	IPI00016677	58 kDa	3	6	2	6	0	0	0	0	0.00852321	0.0154071	0.00544588	0.0164388	0	0	0	0	0.000146952	0.00026564	9.38945e-05	0.000283428	0	0	0	0
706	Microtubule-associated protein 1B	IPI00008868	271 kDa	0	1	0	1	2	1	4	0	0	0.00256786	0	0.0027398	0.00565483	0.00326168	0.0115634	0	0	9.47548e-06	0	1.011e-05	2.08665e-05	1.20357e-05	4.26693e-05	0
707	Isoform 1 of Collagen alpha-1(VII) chain	IPI00025418	295 kDa	0	0	0	0	5	6	1	2	0	0	0	0	0.0141371	0.0195701	0.00289084	0.00751202	0	0	0	0	4.79223e-05	6.63394e-05	9.79946e-06	2.54645e-05
708	Isoform 1 of LIM and senescent cell antigen-like-containing domain protein 2	IPI00815737	39 kDa	3	5	8	24	0	0	0	0	0.00852321	0.0128393	0.0217835	0.0657552	0	0	0	0	0.000218544	0.000329212	0.000558552	0.00168603	0	0	0	0
709	Isoform UBF1 of Nucleolar transcription factor 1	IPI00014533	89 kDa	0	0	0	0	10	0	0	0	0	0	0	0	0.0282741	0	0	0	0	0	0	0	0.000317687	0	0	0
710	CDNA FLJ25298 fis, clone STM07683, highly similar to Protein Tro alpha1 H,myeloma	IPI00386524	54 kDa	0	10	0	0	0	1	0	0	0	0.0256786	0	0	0	0.00326168	0	0	0	0.000475529	0	0	0	6.04016e-05	0	0
711	U3 small nucleolar ribonucleoprotein protein IMP3	IPI00019488	22 kDa	3	3	2	1	2	2	2	1	0.00852321	0.00770357	0.00544588	0.0027398	0.00565483	0.00652337	0.00578168	0.00375601	0.000387419	0.000350162	0.00024754	0.000124536	0.000257038	0.000296517	0.000262804	0.000170728
712	39S ribosomal protein L14, mitochondrial	IPI00418290	16 kDa	1	4	0	4	1	3	0	1	0.00284107	0.0102714	0	0.0109592	0.00282741	0.00978505	0	0.00375601	0.000177567	0.000641964	0	0.00068495	0.000176713	0.000611566	0	0.000234751
713	29 kDa protein	IPI00453476	29 kDa	1	3	2	4	3	0	0	1	0.00284107	0.00770357	0.00544588	0.0109592	0.00848224	0	0	0.00375601	9.79679e-05	0.00026564	0.000187789	0.000377904	0.000292491	0	0	0.000129518
714	Developmentally-regulated GTP-binding protein 1	IPI00031836	41 kDa	4	3	3	4	1	0	2	0	0.0113643	0.00770357	0.00816882	0.0109592	0.00282741	0	0.00578168	0	0.000277178	0.000187892	0.00019924	0.000267298	6.89613e-05	0	0.000141017	0
715	Myristoylated alanine-rich C-kinase substrate	IPI00219301	32 kDa	1	3	1	3	0	0	2	0	0.00284107	0.00770357	0.00272294	0.0082194	0	0	0.00578168	0	8.87835e-05	0.000240736	8.50919e-05	0.000256856	0	0	0.000180678	0
716	ADP-ribosylation factor 6	IPI00215920	20 kDa	2	3	0	3	1	0	3	1	0.00568214	0.00770357	0	0.0082194	0.00282741	0	0.00867253	0.00375601	0.000284107	0.000385178	0	0.00041097	0.000141371	0	0.000433626	0.0001878
717	Ig kappa chain C region	IPI00940069	25 kDa	0	7	0	1	3	1	1	0	0	0.017975	0	0.0027398	0.00848224	0.00326168	0.00289084	0	0	0.000719	0	0.000109592	0.00033929	0.000130467	0.000115634	0
718	ATP-dependent RNA helicase DDX1	IPI00293655	82 kDa	0	4	2	4	0	3	0	0	0	0.0102714	0.00544588	0.0109592	0	0.00978505	0	0	0	0.000125261	6.64132e-05	0.000133649	0	0.00011933	0	0
719	Acidic leucine-rich nuclear phosphoprotein 32 family member A	IPI00025849	29 kDa	0	0	0	0	5	1	6	1	0	0	0	0	0.0141371	0.00326168	0.0173451	0.00375601	0	0	0	0	0.000487485	0.000112472	0.000598105	0.000129518
720	Isoform 1 of Acidic leucine-rich nuclear phosphoprotein 32 family member B	IPI00007423	29 kDa	0	0	0	0	6	3	3	4	0	0	0	0	0.0169645	0.00978505	0.00867253	0.015024	0	0	0	0	0.000584982	0.000337416	0.000299053	0.00051807
721	Charged multivesicular body protein 4b	IPI00025974	25 kDa	1	0	0	0	4	1	9	1	0.00284107	0	0	0	0.0113097	0.00326168	0.0260176	0.00375601	0.000113643	0	0	0	0.000452386	0.000130467	0.0010407	0.00015024
722	Isoform 1 of Basic leucine zipper and W2 domain-containing protein 1	IPI00785096	48 kDa	0	0	0	0	4	2	8	1	0	0	0	0	0.0113097	0.00652337	0.0231267	0.00375601	0	0	0	0	0.000235618	0.000135904	0.000481807	7.82502e-05
723	Isoform XLas-1 of Guanine nucleotide-binding protein G(s) subunit alpha isoforms XLas	IPI00095891	111 kDa	0	0	0	0	8	0	13	7	0	0	0	0	0.0226193	0	0.0375809	0.0262921	0	0	0	0	0.000203778	0	0.000338567	0.000236865
724	Eukaryotic translation initiation factor 5B	IPI00299254	139 kDa	0	0	0	0	5	1	10	0	0	0	0	0	0.0141371	0.00326168	0.0289084	0	0	0	0	0	0.000101706	2.34654e-05	0.000207974	0
725	Ribosome production factor 2 homolog	IPI00396329	36 kDa	2	1	2	2	1	2	0	1	0.00568214	0.00256786	0.00544588	0.0054796	0.00282741	0.00652337	0	0.00375601	0.000157837	7.13293e-05	0.000151274	0.000152211	7.85393e-05	0.000181205	0	0.000104334
726	Rho-related GTP-binding protein RhoE	IPI00001437	27 kDa	3	1	0	5	3	1	4	1	0.00852321	0.00256786	0	0.013699	0.00848224	0.00326168	0.0115634	0.00375601	0.000315675	9.51058e-05	0	0.000507371	0.000314157	0.000120803	0.000428273	0.000139111
727	60S ribosomal protein L22-like 1	IPI00856049	15 kDa	1	3	1	1	4	3	5	0	0.00284107	0.00770357	0.00272294	0.0027398	0.0113097	0.00978505	0.0144542	0	0.000189405	0.000513571	0.000181529	0.000182653	0.000753977	0.000652337	0.000963614	0
728	U3 small nucleolar ribonucleoprotein protein IMP4	IPI00181116	34 kDa	2	0	2	7	1	3	0	2	0.00568214	0	0.00544588	0.0191786	0.00282741	0.00978505	0	0.00751202	0.000167122	0	0.000160173	0.000564077	8.31593e-05	0.000287796	0	0.000220942
729	BAG family molecular chaperone regulator 2	IPI00000643	24 kDa	2	1	2	1	2	0	5	2	0.00568214	0.00256786	0.00544588	0.0027398	0.00565483	0	0.0144542	0.00751202	0.000236756	0.000106994	0.000226912	0.000114158	0.000235618	0	0.000602259	0.000313001
730	Signal recognition particle 72 kDa protein	IPI00215888	75 kDa	2	8	1	4	0	0	2	2	0.00568214	0.0205428	0.00272294	0.0109592	0	0	0.00578168	0.00751202	7.57619e-05	0.000273905	3.63059e-05	0.000146123	0	0	7.70891e-05	0.00010016
731	Cleavage and polyadenylation specificity factor subunit 5	IPI00646917	26 kDa	2	0	0	1	0	0	0	0	0.00568214	0	0	0.0027398	0	0	0	0	0.000218544	0	0	0.000105377	0	0	0	0
732	RNA binding protein, autoantigenic (HnRNP-associated with lethal yellow homolog (Mouse)), isoform CRA_a (Fragment)	IPI00011268	33 kDa	2	3	1	2	2	0	6	1	0.00568214	0.00770357	0.00272294	0.0054796	0.00565483	0	0.0173451	0.00375601	0.000172186	0.000233441	8.25134e-05	0.000166049	0.000171358	0	0.000525608	0.000113818
733	L-lactate dehydrogenase B chain	IPI00219217	37 kDa	0	2	1	7	1	1	0	3	0	0.00513571	0.00272294	0.0191786	0.00282741	0.00326168	0	0.011268	0	0.000138803	7.3593e-05	0.000518341	7.64166e-05	8.81536e-05	0	0.000304541
734	Ewing sarcoma breakpoint region 1 isoform 1	IPI00009841	69 kDa	3	7	0	4	0	1	0	2	0.00852321	0.017975	0	0.0109592	0	0.00326168	0	0.00751202	0.000123525	0.000260507	0	0.000158829	0	4.72708e-05	0	0.00010887
735	Guanine nucleotide-binding protein subunit alpha-11	IPI00305551	42 kDa	0	0	0	0	4	1	8	1	0	0	0	0	0.0113097	0.00326168	0.0231267	0.00375601	0	0	0	0	0.000269278	7.76592e-05	0.000550637	8.94288e-05
736	Isoform 1 of Syntenin-1	IPI00299086	32 kDa	0	0	0	0	3	1	3	3	0	0	0	0	0.00848224	0.00326168	0.00867253	0.011268	0	0	0	0	0.00026507	0.000101928	0.000271016	0.000352126
737	Transcriptional activator protein Pur-beta	IPI00045051	33 kDa	0	0	0	0	4	2	4	1	0	0	0	0	0.0113097	0.00652337	0.0115634	0.00375601	0	0	0	0	0.000342717	0.000197678	0.000350405	0.000113818
738	COP9 signalosome complex subunit 7a	IPI00301419	30 kDa	0	0	0	0	9	2	2	2	0	0	0	0	0.0254467	0.00652337	0.00578168	0.00751202	0	0	0	0	0.000848224	0.000217446	0.000192723	0.000250401
739	Isoform 1 of Proteasome subunit beta type-8	IPI00000783	30 kDa	0	0	0	0	10	1	5	0	0	0	0	0	0.0282741	0.00326168	0.0144542	0	0	0	0	0	0.000942472	0.000108723	0.000481807	0
740	Isoform 1 of Nucleoredoxin	IPI00304267	48 kDa	0	0	0	0	4	1	11	0	0	0	0	0	0.0113097	0.00326168	0.0317993	0	0	0	0	0	0.000235618	6.79518e-05	0.000662485	0
741	Isoform A22 of Neuropilin-2	IPI00029693	105 kDa	0	0	0	0	7	3	5	0	0	0	0	0	0.0197919	0.00978505	0.0144542	0	0	0	0	0	0.000188494	9.3191e-05	0.000137659	0
742	Calponin-2	IPI00015262	34 kDa	0	0	3	9	0	0	0	0	0	0	0.00816882	0.0246582	0	0	0	0	0	0	0.000240259	0.000725241	0	0	0	0
743	cDNA FLJ52545, highly similar to Dickkopf-related protein 3	IPI00002714	40 kDa	0	0	0	0	8	0	7	0	0	0	0	0	0.0226193	0	0.0202359	0	0	0	0	0	0.000565483	0	0.000505897	0
744	Peroxiredoxin-2	IPI00027350	22 kDa	4	5	5	7	7	6	12	7	0.0113643	0.0128393	0.0136147	0.0191786	0.0197919	0.0195701	0.0346901	0.0262921	0.000516558	0.000583604	0.00061885	0.000871755	0.000899632	0.00088955	0.00157682	0.00119509
745	Protein S100-A14	IPI00010214	12 kDa	1	3	2	2	3	3	0	1	0.00284107	0.00770357	0.00544588	0.0054796	0.00848224	0.00978505	0	0.00375601	0.000236756	0.000641964	0.000453823	0.000456634	0.000706854	0.000815421	0	0.000313001
746	Isoform 1 of Heterogeneous nuclear ribonucleoprotein K	IPI00216049	51 kDa	1	2	1	1	2	0	3	2	0.00284107	0.00513571	0.00272294	0.0027398	0.00565483	0	0.00867253	0.00751202	5.57073e-05	0.0001007	5.3391e-05	5.37216e-05	0.000110879	0	0.00017005	0.000147294
747	Glycyl-tRNA synthetase	IPI00783097	83 kDa	2	1	1	2	2	0	6	1	0.00568214	0.00256786	0.00272294	0.0054796	0.00565483	0	0.0173451	0.00375601	6.84595e-05	3.0938e-05	3.28065e-05	6.60193e-05	6.81305e-05	0	0.000208977	4.52531e-05
748	Eukaryotic translation initiation factor 2 subunit 3	IPI00297982	51 kDa	4	3	2	0	1	0	5	0	0.0113643	0.00770357	0.00544588	0	0.00282741	0	0.0144542	0	0.000222829	0.00015105	0.000106782	0	5.54395e-05	0	0.000283416	0
749	Protein-glutamine gamma-glutamyltransferase K	IPI00305622	90 kDa	0	1	2	1	1	3	0	4	0	0.00256786	0.00544588	0.0027398	0.00282741	0.00978505	0	0.015024	0	2.85317e-05	6.05098e-05	3.04422e-05	3.14157e-05	0.000108723	0	0.000166934
750	22 kDa protein	IPI00788747	22 kDa	1	2	3	0	1	0	0	0	0.00284107	0.00513571	0.00816882	0	0.00282741	0	0	0	0.00012914	0.000233441	0.00037131	0	0.000128519	0	0	0
751	Peroxisomal membrane protein 11B	IPI00021978	28 kDa	4	2	3	3	0	0	0	1	0.0113643	0.00513571	0.00816882	0.0082194	0	0	0	0.00375601	0.000405867	0.000183418	0.000291744	0.00029355	0	0	0	0.000134143
752	Protein S100-A16	IPI00062120	12 kDa	2	1	3	0	0	1	0	0	0.00568214	0.00256786	0.00816882	0	0	0.00326168	0	0	0.000473512	0.000213988	0.000680735	0	0	0.000271807	0	0
753	Isoform 1 of Galectin-8	IPI00010844	36 kDa	5	0	3	3	0	0	1	0	0.0142054	0	0.00816882	0.0082194	0	0	0.00289084	0	0.000394593	0	0.000226912	0.000228317	0	0	8.03012e-05	0
754	Exostosin-1	IPI00293128	86 kDa	0	0	0	0	5	3	1	2	0	0	0	0	0.0141371	0.00978505	0.00289084	0.00751202	0	0	0	0	0.000164385	0.00011378	3.36144e-05	8.73491e-05
755	Isoform 1 of MAM domain-containing protein 2	IPI00183750	78 kDa	2	2	2	4	0	0	0	0	0.00568214	0.00513571	0.00544588	0.0109592	0	0	0	0	7.2848e-05	6.58425e-05	6.9819e-05	0.000140503	0	0	0	0
756	Isoform 1 of AP-3 complex subunit delta-1	IPI00411453	130 kDa	0	0	0	0	2	0	5	1	0	0	0	0	0.00565483	0	0.0144542	0.00375601	0	0	0	0	4.34987e-05	0	0.000111186	2.88924e-05
757	40S ribosomal protein S12	IPI00013917	15 kDa	0	0	0	0	3	2	5	1	0	0	0	0	0.00848224	0.00652337	0.0144542	0.00375601	0	0	0	0	0.000565483	0.000434891	0.000963614	0.000250401
758	Isoform 1 of Keratin, type I cuticular Ha6	IPI00008692	52 kDa	0	15	23	0	0	36	22	23	0	0.0385178	0.0626276	0	0	0.117421	0.0635985	0.0863882	0	0.000740728	0.00120438	0	0	0.00225809	0.00122305	0.00166131
759	Band 4.1-like protein 2	IPI00015973	113 kDa	0	0	0	0	1	2	4	1	0	0	0	0	0.00282741	0.00652337	0.0115634	0.00375601	0	0	0	0	2.50214e-05	5.77289e-05	0.000102331	3.3239e-05
760	Isoform 1 of 182 kDa tankyrase-1-binding protein	IPI00304589	182 kDa	0	2	2	7	0	0	0	0	0	0.00513571	0.00544588	0.0191786	0	0	0	0	0	2.82182e-05	2.99224e-05	0.000105377	0	0	0	0
761	DNA damage-binding protein 1	IPI00293464	127 kDa	0	1	0	0	4	0	6	0	0	0.00256786	0	0	0.0113097	0	0.0173451	0	0	2.02193e-05	0	0	8.90524e-05	0	0.000136575	0
762	Low-density lipoprotein receptor	IPI00000070	95 kDa	0	0	0	0	4	0	9	1	0	0	0	0	0.0113097	0	0.0260176	0.00375601	0	0	0	0	0.000119049	0	0.000273869	3.95369e-05
763	Isoform 1 of 39S ribosomal protein L22, mitochondrial	IPI00414410	24 kDa	2	3	1	5	1	2	1	2	0.00568214	0.00770357	0.00272294	0.013699	0.00282741	0.00652337	0.00289084	0.00751202	0.000236756	0.000320982	0.000113456	0.000570792	0.000117809	0.000271807	0.000120452	0.000313001
764	Isoform B1 of Heterogeneous nuclear ribonucleoproteins A2/B1	IPI00396378	37 kDa	1	1	1	0	0	0	0	2	0.00284107	0.00256786	0.00272294	0	0	0	0	0.00751202	7.67857e-05	6.94015e-05	7.3593e-05	0	0	0	0	0.000203028
765	Isoform 1 of Heterogeneous nuclear ribonucleoprotein M	IPI00171903	78 kDa	0	5	0	2	2	2	1	0	0	0.0128393	0	0.0054796	0.00565483	0.00652337	0.00289084	0	0	0.000164606	0	7.02513e-05	7.24978e-05	8.36329e-05	3.70621e-05	0
766	Putative uncharacterized protein PFN2	IPI00795892	10 kDa	1	0	1	1	1	1	3	6	0.00284107	0	0.00272294	0.0027398	0.00282741	0.00326168	0.00867253	0.0225361	0.000284107	0	0.000272294	0.00027398	0.000282741	0.000326168	0.000867253	0.00225361
767	Protein SEC13 homolog	IPI00375370	36 kDa	1	1	1	2	3	0	7	2	0.00284107	0.00256786	0.00272294	0.0054796	0.00848224	0	0.0202359	0.00751202	7.89186e-05	7.13293e-05	7.56372e-05	0.000152211	0.000235618	0	0.000562108	0.000208667
768	triosephosphate isomerase 1 isoform 2	IPI00465028	31 kDa	1	3	1	5	4	0	1	0	0.00284107	0.00770357	0.00272294	0.013699	0.0113097	0	0.00289084	0	9.16474e-05	0.000248502	8.78368e-05	0.000441903	0.000364828	0	9.3253e-05	0
769	Cathepsin B	IPI00295741	38 kDa	0	2	1	0	1	1	7	0	0	0.00513571	0.00272294	0	0.00282741	0.00326168	0.0202359	0	0	0.00013515	7.16563e-05	0	7.44056e-05	8.58338e-05	0.000532523	0
770	Testis-specific Y-encoded-like protein 5	IPI00028279	45 kDa	5	3	2	5	0	0	0	0	0.0142054	0.00770357	0.00544588	0.013699	0	0	0	0	0.000315675	0.00017119	0.00012102	0.000304422	0	0	0	0
771	Protein S100-A9	IPI00027462	13 kDa	4	0	0	2	0	1	0	0	0.0113643	0	0	0.0054796	0	0.00326168	0	0	0.000874176	0	0	0.000421508	0	0.000250899	0	0
772	cDNA FLJ60424, highly similar to Junction plakoglobin	IPI00789324	63 kDa	41	107	85	91	0	0	0	0	0.116484	0.274761	0.23145	0.249322	0	0	0	0	0.00184895	0.00436128	0.00367381	0.00395749	0	0	0	0
773	Isoform 1 of Uncharacterized methyltransferase WBSCR22	IPI00013810	32 kDa	3	3	2	5	0	0	0	0	0.00852321	0.00770357	0.00544588	0.013699	0	0	0	0	0.00026635	0.000240736	0.000170184	0.000428094	0	0	0	0
774	T-complex protein 1 subunit eta	IPI00018465	59 kDa	0	1	0	0	6	0	5	1	0	0.00256786	0	0	0.0169645	0	0.0144542	0.00375601	0	4.3523e-05	0	0	0.000287534	0	0.000244987	6.36612e-05
775	Isoform 1 of AP-2 complex subunit sigma	IPI00219840	17 kDa	1	0	0	0	0	0	3	0	0.00284107	0	0	0	0	0	0.00867253	0	0.000167122	0	0	0	0	0	0.000510149	0
776	Thy-1 membrane glycoprotein	IPI00022892	18 kDa	0	1	0	0	5	1	4	1	0	0.00256786	0	0	0.0141371	0.00326168	0.0115634	0.00375601	0	0.000142659	0	0	0.000785393	0.000181205	0.000642409	0.000208667
777	Isoform 1 of RNA-binding protein with serine-rich domain 1	IPI00033561	34 kDa	0	0	0	0	2	7	0	2	0	0	0	0	0.00565483	0.0228318	0	0.00751202	0	0	0	0	0.000166319	0.000671523	0	0.000220942
778	Eukaryotic translation initiation factor 3, subunit 3 gamma, 40kDa, isoform CRA_b	IPI00647650	42 kDa	0	0	0	0	4	0	9	1	0	0	0	0	0.0113097	0	0.0260176	0.00375601	0	0	0	0	0.000269278	0	0.000619466	8.94288e-05
779	Histone-binding protein RBBP7	IPI00395865	48 kDa	1	0	0	0	5	0	6	0	0.00284107	0	0	0	0.0141371	0	0.0173451	0	5.9189e-05	0	0	0	0.000294522	0	0.000361355	0
780	Isoform Long of Sodium/potassium-transporting ATPase subunit alpha-1	IPI00006482	113 kDa	0	0	0	0	5	0	11	0	0	0	0	0	0.0141371	0	0.0317993	0	0	0	0	0	0.000125107	0	0.000281409	0
781	Cystatin-SA	IPI00013382	16 kDa	0	15	0	0	0	2	0	0	0	0.0385178	0	0	0	0.00652337	0	0	0	0.00240736	0	0	0	0.000407711	0	0
782	Submaxillary gland androgen-regulated protein 3B	IPI00023011	8 kDa	0	6	0	0	0	0	0	0	0	0.0154071	0	0	0	0	0	0	0	0.00192589	0	0	0	0	0	0
783	Eukaryotic translation initiation factor 1A, Y-chromosomal	IPI00023004	16 kDa	2	2	2	2	2	0	1	0	0.00568214	0.00513571	0.00544588	0.0054796	0.00565483	0	0.00289084	0	0.000355134	0.000320982	0.000340368	0.000342475	0.000353427	0	0.000180678	0
784	Isoform 1 of L-lactate dehydrogenase A chain	IPI00217966	37 kDa	3	4	0	5	1	0	1	3	0.00852321	0.0102714	0	0.013699	0.00282741	0	0.00289084	0.011268	0.000230357	0.000277606	0	0.000370243	7.64166e-05	0	7.81309e-05	0.000304541
785	Isoform 2B of GTPase KRas	IPI00423570	21 kDa	4	0	0	0	1	0	2	1	0.0113643	0	0	0	0.00282741	0	0.00578168	0.00375601	0.000541156	0	0	0	0.000134639	0	0.000275318	0.000178858
786	Isoform 2 of Eukaryotic translation initiation factor 5A-1	IPI00376005	20 kDa	1	3	3	4	1	0	0	0	0.00284107	0.00770357	0.00816882	0.0109592	0.00282741	0	0	0	0.000142054	0.000385178	0.000408441	0.00054796	0.000141371	0	0	0
787	507 kDa protein	IPI00031411	507 kDa	0	3	1	2	3	1	2	0	0	0.00770357	0.00272294	0.0054796	0.00848224	0.00326168	0.00578168	0	0	1.51944e-05	5.37069e-06	1.08079e-05	1.67303e-05	6.4333e-06	1.14037e-05	0
788	Nucleoside diphosphate kinase	IPI00604590	33 kDa	0	1	1	2	1	0	0	0	0	0.00256786	0.00272294	0.0054796	0.00282741	0	0	0	0	7.78138e-05	8.25134e-05	0.000166049	8.56792e-05	0	0	0
789	Isoform 1 of Neuroguidin	IPI00000162	36 kDa	2	4	2	2	0	0	0	1	0.00568214	0.0102714	0.00544588	0.0054796	0	0	0	0.00375601	0.000157837	0.000285317	0.000151274	0.000152211	0	0	0	0.000104334
790	Isoform 3 of Spectrin alpha chain, brain	IPI00843765	282 kDa	1	3	1	3	0	0	1	0	0.00284107	0.00770357	0.00272294	0.0082194	0	0	0.00289084	0	1.00747e-05	2.73176e-05	9.65582e-06	2.91468e-05	0	0	1.02512e-05	0
791	Myosin regulatory light polypeptide 9	IPI00220278	20 kDa	1	11	7	9	12	0	6	2	0.00284107	0.0282464	0.0190606	0.0246582	0.033929	0	0.0173451	0.00751202	0.000142054	0.00141232	0.000953029	0.00123291	0.00169645	0	0.000867253	0.000375601
792	Isoform 1 of Melanoma-associated antigen D2	IPI00009542	65 kDa	3	2	0	1	0	0	0	1	0.00852321	0.00513571	0	0.0027398	0	0	0	0.00375601	0.000131126	7.90109e-05	0	4.21508e-05	0	0	0	5.77848e-05
793	Keratin, type I cuticular Ha3-II	IPI00031423	46 kDa	0	23	26	0	29	46	33	32	0	0.0590607	0.0707965	0	0.081995	0.150038	0.0953978	0.120192	0	0.00128393	0.00153905	0	0.0017825	0.00326168	0.00207386	0.00261288
794	72 kDa type IV collagenase	IPI00027780	74 kDa	5	4	4	3	0	0	0	0	0.0142054	0.0102714	0.0108918	0.0082194	0	0	0	0	0.000191964	0.000138803	0.000147186	0.000111073	0	0	0	0
795	cDNA FLJ54030, highly similar to Polymerase delta-interacting protein 3	IPI00440688	48 kDa	5	3	1	2	0	0	0	0	0.0142054	0.00770357	0.00272294	0.0054796	0	0	0	0	0.000295945	0.000160491	5.67279e-05	0.000114158	0	0	0	0
796	Protein S100-A13	IPI00016179	11 kDa	2	1	3	3	0	0	0	0	0.00568214	0.00256786	0.00816882	0.0082194	0	0	0	0	0.000516558	0.000233441	0.00074262	0.000747218	0	0	0	0
797	Isoform 1 of Ectonucleotide pyrophosphatase/phosphodiesterase family member 2	IPI00156171	99 kDa	2	2	0	1	0	0	0	0	0.00568214	0.00513571	0	0.0027398	0	0	0	0	5.73954e-05	5.18759e-05	0	2.76748e-05	0	0	0	0
798	Isoform 1 of Plasminogen activator inhibitor 1 RNA-binding protein	IPI00410693	45 kDa	0	1	0	2	0	0	0	2	0	0.00256786	0	0.0054796	0	0	0	0.00751202	0	5.70635e-05	0	0.000121769	0	0	0	0.000166934
799	Isoform 1 of Splicing factor, arginine/serine-rich 7	IPI00003377	27 kDa	0	0	0	0	8	0	4	3	0	0	0	0	0.0226193	0	0.0115634	0.011268	0	0	0	0	0.000837752	0	0.000428273	0.000417334
800	Copine-3	IPI00024403	60 kDa	0	1	0	0	3	0	9	1	0	0.00256786	0	0	0.00848224	0	0.0260176	0.00375601	0	4.27976e-05	0	0	0.000141371	0	0.000433626	6.26002e-05
801	Integrin alpha-1	IPI00743104	131 kDa	0	3	3	5	0	0	0	0	0	0.00770357	0.00816882	0.013699	0	0	0	0	0	5.88059e-05	6.23574e-05	0.000104573	0	0	0	0
802	Glutathione S-transferase Mu 3	IPI00246975	27 kDa	0	0	0	0	3	1	3	0	0	0	0	0	0.00848224	0.00326168	0.00867253	0	0	0	0	0	0.000314157	0.000120803	0.000321205	0
803	Prolargin	IPI00020987	44 kDa	6	0	6	0	0	0	0	0	0.0170464	0	0.0163376	0	0	0	0	0	0.000387419	0	0.00037131	0	0	0	0	0
804	Isoform 1 of Protein POF1B	IPI00103242	69 kDa	0	0	1	1	1	2	2	2	0	0	0.00272294	0.0027398	0.00282741	0.00652337	0.00578168	0.00751202	0	0	3.94629e-05	3.97073e-05	4.0977e-05	9.45416e-05	8.37925e-05	0.00010887
805	Ras-related protein Rab-13	IPI00016373	23 kDa	0	4	1	1	2	0	3	4	0	0.0102714	0.00272294	0.0027398	0.00565483	0	0.00867253	0.015024	0	0.000446584	0.000118389	0.000119122	0.000245862	0	0.000377066	0.000653219
806	39S ribosomal protein L9, mitochondrial	IPI00307409	30 kDa	2	0	1	3	0	1	0	1	0.00568214	0	0.00272294	0.0082194	0	0.00326168	0	0.00375601	0.000189405	0	9.07647e-05	0.00027398	0	0.000108723	0	0.0001252
807	Isoform 1 of Peroxisomal 2,4-dienoyl-CoA reductase	IPI00010190	31 kDa	1	2	2	3	0	2	0	1	0.00284107	0.00513571	0.00544588	0.0082194	0	0.00652337	0	0.00375601	9.16474e-05	0.000165668	0.000175674	0.000265142	0	0.000210431	0	0.000121162
808	Single-stranded DNA-binding protein, mitochondrial	IPI00029744	17 kDa	1	0	0	1	2	3	2	4	0.00284107	0	0	0.0027398	0.00565483	0.00978505	0.00578168	0.015024	0.000167122	0	0	0.000161165	0.000332637	0.000575591	0.000340099	0.000883767
809	Cathepsin D	IPI00011229	45 kDa	1	0	0	2	2	1	0	3	0.00284107	0	0	0.0054796	0.00565483	0.00326168	0	0.011268	6.31349e-05	0	0	0.000121769	0.000125663	7.24819e-05	0	0.000250401
810	poly(rC) binding protein 2 isoform b	IPI00012066	38 kDa	4	6	2	11	12	0	19	8	0.0113643	0.0154071	0.00544588	0.0301378	0.033929	0	0.054926	0.0300481	0.00029906	0.000405451	0.000143313	0.0007931	0.000892868	0	0.00144542	0.000790739
811	Isoform 2 of Septin-11	IPI00019376	51 kDa	0	5	2	5	4	0	6	0	0	0.0128393	0.00544588	0.013699	0.0113097	0	0.0173451	0	0	0.000251751	0.000106782	0.000268608	0.000221758	0	0.000340099	0
812	Isoform 4 of Inhibitor of nuclear factor kappa-B kinase-interacting protein	IPI00043598	43 kDa	0	3	2	1	1	0	1	0	0	0.00770357	0.00544588	0.0027398	0.00282741	0	0.00289084	0	0	0.000179153	0.000126648	6.37163e-05	6.57538e-05	0	6.72289e-05	0
813	Ras-related protein Rab-14	IPI00291928	24 kDa	4	2	1	1	10	0	20	2	0.0113643	0.00513571	0.00272294	0.0027398	0.0282741	0	0.0578168	0.00751202	0.000473512	0.000213988	0.000113456	0.000114158	0.00117809	0	0.00240903	0.000313001
814	Acidic leucine-rich nuclear phosphoprotein 32 family member E	IPI00165393	31 kDa	0	0	0	0	3	1	1	4	0	0	0	0	0.00848224	0.00326168	0.00289084	0.015024	0	0	0	0	0.000273621	0.000105216	9.3253e-05	0.000484646
815	Isoform 1 of Olfactomedin-like protein 2B	IPI00470766	84 kDa	0	0	0	0	3	0	1	4	0	0	0	0	0.00848224	0	0.00289084	0.015024	0	0	0	0	0.000100979	0	3.44148e-05	0.000178858
816	Isoform 1 of Rho guanine nucleotide exchange factor 2	IPI00291316	112 kDa	2	7	1	1	0	0	0	0	0.00568214	0.017975	0.00272294	0.0027398	0	0	0	0	5.07334e-05	0.000160491	2.4312e-05	2.44625e-05	0	0	0	0
817	Seryl-tRNA synthetase, cytoplasmic	IPI00220637	59 kDa	1	0	0	0	5	0	7	0	0.00284107	0	0	0	0.0141371	0	0.0202359	0	4.81537e-05	0	0	0	0.000239611	0	0.000342981	0
818	Acylamino-acid-releasing enzyme	IPI00337741	81 kDa	0	0	0	0	6	0	8	0	0	0	0	0	0.0169645	0	0.0231267	0	0	0	0	0	0.000209438	0	0.000285515	0
819	Isoform 1 of Reticulon-4	IPI00021766	130 kDa	0	0	0	0	4	0	4	0	0	0	0	0	0.0113097	0	0.0115634	0	0	0	0	0	8.69974e-05	0	8.8949e-05	0
820	cDNA FLJ60076, highly similar to ELAV-like protein 1	IPI00301936	39 kDa	3	3	1	2	0	1	1	2	0.00852321	0.00770357	0.00272294	0.0054796	0	0.00326168	0.00289084	0.00751202	0.000218544	0.000197527	6.9819e-05	0.000140503	0	8.36329e-05	7.41241e-05	0.000192616
821	NHP2-like protein 1	IPI00026167	14 kDa	1	1	0	1	2	3	4	2	0.00284107	0.00256786	0	0.0027398	0.00565483	0.00978505	0.0115634	0.00751202	0.000202934	0.000183418	0	0.0001957	0.000403916	0.000698932	0.000825955	0.000536573
822	Cold-inducible RNA-binding protein	IPI00180954	19 kDa	3	3	2	1	0	2	0	2	0.00852321	0.00770357	0.00544588	0.0027398	0	0.00652337	0	0.00751202	0.00044859	0.000405451	0.000286625	0.0001442	0	0.000343335	0	0.000395369
823	ATP-dependent DNA helicase 2 subunit 1	IPI00644712	70 kDa	0	0	1	0	5	1	2	1	0	0	0.00272294	0	0.0141371	0.00326168	0.00578168	0.00375601	0	0	3.88992e-05	0	0.000201958	4.65955e-05	8.25955e-05	5.36573e-05
824	U3 small nucleolar RNA-associated protein 18 homolog	IPI00000733	64 kDa	3	4	1	4	0	0	0	0	0.00852321	0.0102714	0.00272294	0.0109592	0	0	0	0	0.000133175	0.000160491	4.25459e-05	0.000171238	0	0	0	0
825	Isoform 1 of Phostensin	IPI00152853	68 kDa	0	1	0	4	0	1	0	1	0	0.00256786	0	0.0109592	0	0.00326168	0	0.00375601	0	3.77626e-05	0	0.000161165	0	4.7966e-05	0	5.52354e-05
826	Lactoferrin	IPI00925547	78 kDa	0	1	0	1	3	0	0	0	0	0.00256786	0	0.0027398	0.00848224	0	0	0	0	3.29212e-05	0	3.51257e-05	0.000108747	0	0	0
827	Protein AATF	IPI00302238	63 kDa	4	6	2	3	0	0	0	0	0.0113643	0.0154071	0.00544588	0.0082194	0	0	0	0	0.000180385	0.000244558	8.64426e-05	0.000130467	0	0	0	0
828	Protein disulfide-isomerase A3	IPI00025252	57 kDa	5	3	1	3	0	0	0	0	0.0142054	0.00770357	0.00272294	0.0082194	0	0	0	0	0.000249217	0.00013515	4.77709e-05	0.0001442	0	0	0	0
829	PDZ and LIM domain protein 1	IPI00010414	36 kDa	1	2	3	8	0	0	0	0	0.00284107	0.00513571	0.00816882	0.0219184	0	0	0	0	7.89186e-05	0.000142659	0.000226912	0.000608845	0	0	0	0
830	Isoform 1 of Hepatocyte growth factor	IPI00025767	83 kDa	2	3	1	0	0	0	0	0	0.00568214	0.00770357	0.00272294	0	0	0	0	0	6.84595e-05	9.28141e-05	3.28065e-05	0	0	0	0	0
831	Isoform 1 of Serine/threonine-protein phosphatase 6 catalytic subunit	IPI00012970	35 kDa	0	0	0	0	5	0	4	3	0	0	0	0	0.0141371	0	0.0115634	0.011268	0	0	0	0	0.000403916	0	0.000330382	0.000321944
832	FACT complex subunit SPT16	IPI00026970	120 kDa	0	0	0	0	2	0	3	0	0	0	0	0	0.00565483	0	0.00867253	0	0	0	0	0	4.71236e-05	0	7.2271e-05	0
833	Cell proliferation-inducing protein 41	IPI00219000	73 kDa	0	5	2	2	0	0	0	0	0	0.0128393	0.00544588	0.0054796	0	0	0	0	0	0.000175881	7.46011e-05	7.5063e-05	0	0	0	0
834	Isoform 1 of Myoferlin	IPI00021048	235 kDa	0	2	0	0	0	0	2	0	0	0.00513571	0	0	0	0	0.00578168	0	0	2.18541e-05	0	0	0	0	2.46029e-05	0
835	Importin subunit alpha-4	IPI00012578	58 kDa	0	0	0	0	4	2	5	0	0	0	0	0	0.0113097	0.00652337	0.0144542	0	0	0	0	0	0.000194994	0.000112472	0.000249211	0
836	Microtubule-actin cross-linking factor 1, isoform 4	IPI00432363	670 kDa	0	20	15	42	0	0	0	0	0	0.0513571	0.0408441	0.115072	0	0	0	0	0	7.66524e-05	6.09614e-05	0.000171749	0	0	0	0
837	Leupaxin	IPI00299066	43 kDa	0	2	2	6	0	0	0	0	0	0.00513571	0.00544588	0.0164388	0	0	0	0	0	0.000119435	0.000126648	0.000382298	0	0	0	0
838	Guanine nucleotide-binding protein G(I)/G(S)/G(O) subunit gamma-5	IPI00027240	7 kDa	0	0	0	0	3	1	3	0	0	0	0	0	0.00848224	0.00326168	0.00867253	0	0	0	0	0	0.00121175	0.000465955	0.00123893	0
839	cDNA FLJ13286 fis, clone OVARC1001154, highly similar to Homo sapiens clone 24720 epithelin 1 and 2 mRNA	IPI00181753	44 kDa	1	3	3	0	0	0	0	0	0.00284107	0.00770357	0.00816882	0	0	0	0	0	6.45698e-05	0.000175081	0.000185655	0	0	0	0	0
840	Chloride intracellular channel protein 4	IPI00001960	29 kDa	0	1	0	0	5	0	1	0	0	0.00256786	0	0	0.0141371	0	0.00289084	0	0	8.85467e-05	0	0	0.000487485	0	9.96842e-05	0
841	Flotillin-2	IPI00789008	47 kDa	0	1	0	0	5	0	6	0	0	0.00256786	0	0	0.0141371	0	0.0173451	0	0	5.46352e-05	0	0	0.000300789	0	0.000369044	0
842	CD63 antigen	IPI00215998	26 kDa	0	0	0	0	2	0	6	0	0	0	0	0	0.00565483	0	0.0173451	0	0	0	0	0	0.000217493	0	0.000667117	0
843	Mitogen-activated protein kinase 1	IPI00003479	41 kDa	4	2	1	0	0	1	5	1	0.0113643	0.00513571	0.00272294	0	0	0.00326168	0.0144542	0.00375601	0.000277178	0.000125261	6.64132e-05	0	0	7.95533e-05	0.000352542	9.161e-05
844	Bleomycin hydrolase	IPI00219575	53 kDa	0	1	1	0	0	3	0	0	0	0.00256786	0.00272294	0	0	0.00978505	0	0	0	4.84501e-05	5.13762e-05	0	0	0.000184624	0	0
845	Myosin-Id	IPI00329719	116 kDa	1	1	2	2	0	0	1	2	0.00284107	0.00256786	0.00544588	0.0054796	0	0	0.00289084	0.00751202	2.4492e-05	2.21367e-05	4.69473e-05	4.72379e-05	0	0	2.49211e-05	6.47588e-05
846	Protein-lysine 6-oxidase	IPI00002802	47 kDa	1	1	5	1	1	0	2	0	0.00284107	0.00256786	0.0136147	0.0027398	0.00282741	0	0.00578168	0	6.04483e-05	5.46352e-05	0.000289675	5.82936e-05	6.01578e-05	0	0.000123015	0
847	39S ribosomal protein L17, mitochondrial	IPI00172591	20 kDa	0	0	0	1	0	3	0	0	0	0	0	0.0027398	0	0.00978505	0	0	0	0	0	0.00013699	0	0.000489253	0	0
848	TP53-regulating kinase	IPI00290305	28 kDa	3	1	0	1	0	1	0	1	0.00852321	0.00256786	0	0.0027398	0	0.00326168	0	0.00375601	0.0003044	9.17091e-05	0	9.785e-05	0	0.000116489	0	0.000134143
849	Isoform 1 of Protein SDA1 homolog	IPI00018240	80 kDa	2	3	1	2	0	0	0	0	0.00568214	0.00770357	0.00272294	0.0054796	0	0	0	0	7.10268e-05	9.62946e-05	3.40368e-05	6.8495e-05	0	0	0	0
850	Non-POU domain-containing octamer-binding protein	IPI00304596	54 kDa	2	4	1	5	0	0	0	0	0.00568214	0.0102714	0.00272294	0.013699	0	0	0	0	0.000105225	0.000190212	5.04248e-05	0.000253685	0	0	0	0
851	Large subunit GTPase 1 homolog	IPI00300094	75 kDa	2	4	1	1	0	0	0	0	0.00568214	0.0102714	0.00272294	0.0027398	0	0	0	0	7.57619e-05	0.000136952	3.63059e-05	3.65307e-05	0	0	0	0
852	18 kDa protein	IPI00644570	18 kDa	0	0	0	5	21	21	12	18	0	0	0	0.013699	0.0593757	0.0684954	0.0346901	0.0676082	0	0	0	0.000761056	0.00329865	0.0038053	0.00192723	0.00375601
853	Asparaginyl-tRNA synthetase, cytoplasmic	IPI00306960	63 kDa	0	0	0	0	4	0	1	0	0	0	0	0	0.0113097	0	0.00289084	0	0	0	0	0	0.000179518	0	4.58864e-05	0
854	Isoform 1 of WD repeat-containing protein 1	IPI00746165	66 kDa	1	1	1	4	0	0	0	0	0.00284107	0.00256786	0.00272294	0.0109592	0	0	0	0	4.30465e-05	3.89069e-05	4.12567e-05	0.000166049	0	0	0	0
855	25 kDa protein	IPI00939270	25 kDa	2	2	0	0	2	2	0	1	0.00568214	0.00513571	0	0	0.00565483	0.00652337	0	0.00375601	0.000227286	0.000205428	0	0	0.000226193	0.000260935	0	0.00015024
856	Small nuclear ribonucleoprotein G	IPI00016572	8 kDa	0	0	0	0	4	0	3	3	0	0	0	0	0.0113097	0	0.00867253	0.011268	0	0	0	0	0.00141371	0	0.00108407	0.0014085
857	Src substrate cortactin	IPI00029601	62 kDa	0	1	2	7	0	0	0	0	0	0.00256786	0.00544588	0.0191786	0	0	0	0	0	4.1417e-05	8.78368e-05	0.000309332	0	0	0	0
858	Isoform 1 of Nexilin	IPI00180404	81 kDa	0	0	1	3	0	0	1	0	0	0	0.00272294	0.0082194	0	0	0.00289084	0	0	0	3.36166e-05	0.000101474	0	0	3.56894e-05	0
859	Isoform 1 of COP9 signalosome complex subunit 1	IPI00156282	56 kDa	0	0	0	0	1	1	2	0	0	0	0	0	0.00282741	0.00326168	0.00578168	0	0	0	0	0	5.04895e-05	5.82444e-05	0.000103244	0
860	Cathepsin K	IPI00300599	37 kDa	6	0	4	0	0	0	0	0	0.0170464	0	0.0108918	0	0	0	0	0	0.000460714	0	0.000294372	0	0	0	0	0
861	Proteasome subunit beta type-7	IPI00003217	30 kDa	0	0	0	0	6	0	3	0	0	0	0	0	0.0169645	0	0.00867253	0	0	0	0	0	0.000565483	0	0.000289084	0
862	Dipeptidyl peptidase 4	IPI00018953	88 kDa	0	0	0	0	6	0	5	0	0	0	0	0	0.0169645	0	0.0144542	0	0	0	0	0	0.000192778	0	0.000164252	0
863	WASH complex subunit strumpellin	IPI00029175	134 kDa	0	0	0	0	1	0	8	0	0	0	0	0	0.00282741	0	0.0231267	0	0	0	0	0	2.11001e-05	0	0.000172588	0
864	Isoform p150 of Dynactin subunit 1	IPI00029485	142 kDa	0	0	0	0	3	0	10	0	0	0	0	0	0.00848224	0	0.0289084	0	0	0	0	0	5.97341e-05	0	0.00020358	0
865	Ig gamma-1 chain C region, membrane-bound form	IPI00308213	43 kDa	0	9	0	0	0	0	0	0	0	0.0231107	0	0	0	0	0	0	0	0.000537458	0	0	0	0	0	0
866	Isoform A of Uncharacterized protein C21orf70	IPI00027898	25 kDa	2	2	3	0	0	1	0	0	0.00568214	0.00513571	0.00816882	0	0	0.00326168	0	0	0.000227286	0.000205428	0.000326753	0	0	0.000130467	0	0
867	Carbonyl reductase [NADPH] 1	IPI00295386	30 kDa	2	0	0	1	0	0	2	1	0.00568214	0	0	0.0027398	0	0	0.00578168	0.00375601	0.000189405	0	0	9.13267e-05	0	0	0.000192723	0.0001252
868	28S ribosomal protein S15, mitochondrial	IPI00550037	30 kDa	1	3	1	1	1	0	0	0	0.00284107	0.00770357	0.00272294	0.0027398	0.00282741	0	0	0	9.47024e-05	0.000256786	9.07647e-05	9.13267e-05	9.42472e-05	0	0	0
869	Something about silencing protein 10	IPI00006900	55 kDa	3	4	2	3	0	0	0	0	0.00852321	0.0102714	0.00544588	0.0082194	0	0	0	0	0.000154967	0.000186753	9.9016e-05	0.000149444	0	0	0	0
870	Isoform 1 of Splicing factor 3B subunit 3	IPI00300371	136 kDa	0	0	0	0	2	3	4	1	0	0	0	0	0.00565483	0.00978505	0.0115634	0.00375601	0	0	0	0	4.15796e-05	7.19489e-05	8.50248e-05	2.76177e-05
871	Zinc finger protein 593	IPI00844193	15 kDa	1	1	1	3	0	0	0	0	0.00284107	0.00256786	0.00272294	0.0082194	0	0	0	0	0.000189405	0.00017119	0.000181529	0.00054796	0	0	0	0
872	Transcription elongation factor SPT4	IPI00002895	13 kDa	0	1	2	0	3	0	1	0	0	0.00256786	0.00544588	0	0.00848224	0	0.00289084	0	0	0.000197527	0.000418914	0	0.00065248	0	0.000222372	0
873	Rho-related GTP-binding protein RhoG	IPI00017342	21 kDa	0	1	1	0	3	0	3	0	0	0.00256786	0.00272294	0	0.00848224	0	0.00867253	0	0	0.000122279	0.000129664	0	0.000403916	0	0.000412977	0
874	Isoform 1 of U4/U6 small nuclear ribonucleoprotein Prp31	IPI00292000	55 kDa	4	4	1	1	0	0	0	0	0.0113643	0.0102714	0.00272294	0.0027398	0	0	0	0	0.000206623	0.000186753	4.9508e-05	4.98146e-05	0	0	0	0
875	cDNA FLJ54710, highly similar to Target of Myb protein 1	IPI00023191	55 kDa	0	0	0	0	3	1	4	2	0	0	0	0	0.00848224	0.00326168	0.0115634	0.00751202	0	0	0	0	0.000154223	5.93034e-05	0.000210243	0.000136582
876	Nucleolar complex protein 2 homolog	IPI00411886	85 kDa	2	2	0	4	0	0	0	0	0.00568214	0.00513571	0	0.0109592	0	0	0	0	6.68487e-05	6.04201e-05	0	0.000128932	0	0	0	0
877	CD81 antigen	IPI00000190	26 kDa	0	0	0	0	1	1	5	0	0	0	0	0	0.00282741	0.00326168	0.0144542	0	0	0	0	0	0.000108747	0.000125449	0.000555931	0
878	Isoform 1 of Seprase	IPI00295461	88 kDa	0	0	0	0	1	1	4	0	0	0	0	0	0.00282741	0.00326168	0.0115634	0	0	0	0	0	3.21297e-05	3.70646e-05	0.000131402	0
879	Isoform 1 of RRP12-like protein	IPI00101186	144 kDa	0	4	0	2	0	1	0	0	0	0.0102714	0	0.0054796	0	0.00326168	0	0	0	7.13293e-05	0	3.80528e-05	0	2.26506e-05	0	0
880	Sin3A-associated protein, 18kDa	IPI00011698	20 kDa	0	0	0	0	2	2	0	0	0	0	0	0	0.00565483	0.00652337	0	0	0	0	0	0	0.000282741	0.000326168	0	0
881	Isoform LMP2.L of Proteasome subunit beta type-9	IPI00000787	23 kDa	0	0	0	0	7	0	6	0	0	0	0	0	0.0197919	0	0.0173451	0	0	0	0	0	0.000860517	0	0.000754133	0
882	Aspartyl-tRNA synthetase, cytoplasmic	IPI00216951	57 kDa	0	0	0	0	2	0	5	0	0	0	0	0	0.00565483	0	0.0144542	0	0	0	0	0	9.92075e-05	0	0.000253583	0
883	Copine II	IPI00645310	64 kDa	0	0	0	0	0	0	3	0	0	0	0	0	0	0	0.00867253	0	0	0	0	0	0	0	0.000135508	0
884	Isoform 1 of Complement decay-accelerating factor	IPI00216550	49 kDa	2	1	0	0	0	1	1	1	0.00568214	0.00256786	0	0	0	0.00326168	0.00289084	0.00375601	0.000115962	5.24052e-05	0	0	0	6.6565e-05	5.89968e-05	7.66533e-05
885	Uncharacterized protein DKFZp762I1415	IPI00032343	11 kDa	2	0	1	0	2	2	1	0	0.00568214	0	0.00272294	0	0.00565483	0.00652337	0.00289084	0	0.000516558	0	0.00024754	0	0.000514075	0.000593034	0.000262804	0
886	Isoform 1 of Nucleolar protein 6	IPI00152890	128 kDa	0	2	0	2	0	1	0	1	0	0.00513571	0	0.0054796	0	0.00326168	0	0.00375601	0	4.01227e-05	0	4.28094e-05	0	2.54819e-05	0	2.93438e-05
887	Isoform IIa of Prolyl 4-hydroxylase subunit alpha-2	IPI00182373	61 kDa	3	1	0	1	3	0	2	0	0.00852321	0.00256786	0	0.0027398	0.00848224	0	0.00578168	0	0.000139725	4.2096e-05	0	4.49148e-05	0.000139053	0	9.47817e-05	0
888	Retinal dehydrogenase 1	IPI00218914	55 kDa	0	0	1	1	2	0	2	1	0	0	0.00272294	0.0027398	0.00565483	0	0.00578168	0.00375601	0	0	4.9508e-05	4.98146e-05	0.000102815	0	0.000105122	6.82911e-05
889	Calponin-1	IPI00021264	33 kDa	2	1	3	4	0	1	0	0	0.00568214	0.00256786	0.00816882	0.0109592	0	0.00326168	0	0	0.000172186	7.78138e-05	0.00024754	0.000332097	0	9.88389e-05	0	0
890	TMF-regulated nuclear protein 1	IPI00419562	23 kDa	2	4	0	1	0	1	0	0	0.00568214	0.0102714	0	0.0027398	0	0.00326168	0	0	0.00024705	0.000446584	0	0.000119122	0	0.000141812	0	0
891	Golgi-associated plant pathogenesis-related protein 1	IPI00007067	17 kDa	4	1	4	1	0	0	0	0	0.0113643	0.00256786	0.0108918	0.0027398	0	0	0	0	0.000668487	0.00015105	0.000640692	0.000161165	0	0	0	0
892	Isoform 1 of Polyadenylate-binding protein 4	IPI00012726	71 kDa	0	0	0	0	8	0	13	2	0	0	0	0	0.0226193	0	0.0375809	0.00751202	0	0	0	0	0.000318582	0	0.000529309	0.000105803
893	Probable cytosolic iron-sulfur protein assembly protein CIAO1	IPI00008791	38 kDa	0	0	0	0	2	0	3	1	0	0	0	0	0.00565483	0	0.00867253	0.00375601	0	0	0	0	0.000148811	0	0.000228224	9.88424e-05
894	Galectin-3-binding protein	IPI00023673	65 kDa	0	0	5	5	0	0	0	0	0	0	0.0136147	0.013699	0	0	0	0	0	0	0.000209457	0.000210754	0	0	0	0
895	Isoform 1 of Heterogeneous nuclear ribonucleoprotein U-like protein 1	IPI00013070	96 kDa	0	0	0	0	3	2	0	0	0	0	0	0	0.00848224	0.00652337	0	0	0	0	0	0	8.83567e-05	6.79518e-05	0	0
896	Isoform 1 of Annexin A7	IPI00002460	53 kDa	0	0	0	0	1	1	6	0	0	0	0	0	0.00282741	0.00326168	0.0173451	0	0	0	0	0	5.33474e-05	6.15412e-05	0.000327265	0
897	Vacuolar protein sorting-associated protein 4A	IPI00411356	49 kDa	0	0	0	0	3	0	7	0	0	0	0	0	0.00848224	0	0.0202359	0	0	0	0	0	0.000173107	0	0.000412977	0
898	Cytosolic purine 5'-nucleotidase	IPI00029054	65 kDa	0	0	0	0	4	0	7	0	0	0	0	0	0.0113097	0	0.0202359	0	0	0	0	0	0.000173995	0	0.000311321	0
899	Phosphoglycerate kinase 1	IPI00169383	45 kDa	0	2	1	2	1	0	3	0	0	0.00513571	0.00272294	0.0054796	0.00282741	0	0.00867253	0	0	0.000114127	6.05098e-05	0.000121769	6.28314e-05	0	0.000192723	0
900	Peptidyl-prolyl cis-trans isomerase FKBP9	IPI00182126	63 kDa	2	2	3	3	0	0	0	0	0.00568214	0.00513571	0.00816882	0.0082194	0	0	0	0	9.01927e-05	8.15192e-05	0.000129664	0.000130467	0	0	0	0
901	Isoform 1 of 60S ribosome subunit biogenesis protein NIP7 homolog	IPI00007175	20 kDa	1	0	2	2	0	0	0	0	0.00284107	0	0.00544588	0.0054796	0	0	0	0	0.000142054	0	0.000272294	0.00027398	0	0	0	0
902	37 kDa protein	IPI00032799	37 kDa	5	0	1	1	0	1	0	0	0.0142054	0	0.00272294	0.0027398	0	0.00326168	0	0	0.000383928	0	7.3593e-05	7.40487e-05	0	8.81536e-05	0	0
903	Isoform 3 of Protein transport protein Sec31A	IPI00305152	122 kDa	0	1	0	1	1	1	5	0	0	0.00256786	0	0.0027398	0.00282741	0.00326168	0.0144542	0	0	2.1048e-05	0	2.24574e-05	2.31755e-05	2.67351e-05	0.000118477	0
904	Charged multivesicular body protein 2b	IPI00550181	24 kDa	0	1	1	0	3	0	2	0	0	0.00256786	0.00272294	0	0.00848224	0	0.00578168	0	0	0.000106994	0.000113456	0	0.000353427	0	0.000240903	0
905	Isoform B of Transforming growth factor beta-2	IPI00220156	51 kDa	3	0	3	2	0	0	0	0	0.00852321	0	0.00816882	0.0054796	0	0	0	0	0.000167122	0	0.000160173	0.000107443	0	0	0	0
906	Uncharacterized protein C19orf52	IPI00157215	29 kDa	2	1	0	4	0	0	0	1	0.00568214	0.00256786	0	0.0109592	0	0	0	0.00375601	0.000195936	8.85467e-05	0	0.000377904	0	0	0	0.000129518
907	Mitochondrial 2-oxoglutarate/malate carrier protein	IPI00219729	34 kDa	3	1	1	3	0	0	0	0	0.00852321	0.00256786	0.00272294	0.0082194	0	0	0	0	0.000250683	7.55252e-05	8.00865e-05	0.000241747	0	0	0	0
908	ATP-dependent RNA helicase DDX18	IPI00301323	75 kDa	1	4	0	3	0	0	0	0	0.00284107	0.0102714	0	0.0082194	0	0	0	0	3.78809e-05	0.000136952	0	0.000109592	0	0	0	0
909	cDNA FLJ55177, highly similar to Ras-related protein Ral-B	IPI00004397	26 kDa	8	0	0	0	7	5	7	6	0.0227286	0	0	0	0.0197919	0.0163084	0.0202359	0.0225361	0.000874176	0	0	0	0.000761227	0.000627247	0.000778304	0.000866771
910	G protein-coupled receptor kinase interactor 1 isoform 1	IPI00795611	85 kDa	0	3	5	6	0	0	0	0	0	0.00770357	0.0136147	0.0164388	0	0	0	0	0	9.06302e-05	0.000160173	0.000193398	0	0	0	0
911	Destrin	IPI00473014	19 kDa	0	0	1	0	1	0	3	0	0	0	0.00272294	0	0.00282741	0	0.00867253	0	0	0	0.000143313	0	0.000148811	0	0.000456449	0
912	Guanine nucleotide-binding protein G(k) subunit alpha	IPI00220578	41 kDa	0	0	0	0	8	0	13	9	0	0	0	0	0.0226193	0	0.0375809	0.0338041	0	0	0	0	0.000551691	0	0.000916608	0.00082449
913	Isoform 1 of Translation initiation factor eIF-2B subunit gamma	IPI00006504	50 kDa	0	0	0	0	0	1	4	0	0	0	0	0	0	0.00326168	0.0115634	0	0	0	0	0	0	6.52337e-05	0.000231267	0
914	Isoform Long of Transformer-2 protein homolog alpha	IPI00013891	33 kDa	0	0	0	0	3	0	5	2	0	0	0	0	0.00848224	0	0.0144542	0.00751202	0	0	0	0	0.000257038	0	0.000438006	0.000227637
915	Staphylococcal nuclease domain-containing protein 1	IPI00140420	102 kDa	1	2	0	4	0	0	0	0	0.00284107	0.00513571	0	0.0109592	0	0	0	0	2.78536e-05	5.03501e-05	0	0.000107443	0	0	0	0
916	Epidermal growth factor-like protein 7	IPI00383960	30 kDa	0	1	0	0	2	5	0	0	0	0.00256786	0	0	0.00565483	0.0163084	0	0	0	8.55952e-05	0	0	0.000188494	0.000543614	0	0
917	Ras-related protein Rab-2A	IPI00031169	24 kDa	0	0	0	0	4	0	3	1	0	0	0	0	0.0113097	0	0.00867253	0.00375601	0	0	0	0	0.000471236	0	0.000361355	0.0001565
918	Nuclear transport factor 2	IPI00009901	14 kDa	0	0	0	0	1	0	3	0	0	0	0	0	0.00282741	0	0.00867253	0	0	0	0	0	0.000201958	0	0.000619466	0
919	Isoform 2 of Zinc finger CCHC domain-containing protein 10	IPI00014891	18 kDa	0	0	0	0	3	3	1	0	0	0	0	0	0.00848224	0.00978505	0.00289084	0	0	0	0	0	0.000471236	0.000543614	0.000160602	0
920	Isoform 1 of 26S proteasome non-ATPase regulatory subunit 1	IPI00299608	106 kDa	0	0	0	0	1	0	4	0	0	0	0	0	0.00282741	0	0.0115634	0	0	0	0	0	2.66737e-05	0	0.000109088	0
921	Interstitial collagenase	IPI00008561	54 kDa	0	4	0	2	0	0	0	0	0	0.0102714	0	0.0054796	0	0	0	0	0	0.000190212	0	0.000101474	0	0	0	0
922	Programmed cell death protein 6	IPI00025277	22 kDa	0	0	0	0	1	0	5	0	0	0	0	0	0.00282741	0	0.0144542	0	0	0	0	0	0.000128519	0	0.00065701	0
923	UDP-glucose 6-dehydrogenase	IPI00031420	55 kDa	0	0	0	0	0	0	4	1	0	0	0	0	0	0	0.0115634	0.00375601	0	0	0	0	0	0	0.000210243	6.82911e-05
924	Thioredoxin	IPI00216298	12 kDa	1	1	0	1	0	0	1	2	0.00284107	0.00256786	0	0.0027398	0	0	0.00289084	0.00751202	0.000236756	0.000213988	0	0.000228317	0	0	0.000240903	0.000626002
925	Isoform 1 of Prolyl 4-hydroxylase subunit alpha-1	IPI00009923	61 kDa	2	0	1	1	1	0	1	0	0.00568214	0	0.00272294	0.0027398	0.00282741	0	0.00289084	0	9.31499e-05	0	4.46384e-05	4.49148e-05	4.63511e-05	0	4.73908e-05	0
926	39S ribosomal protein L16, mitochondrial	IPI00000821	28 kDa	0	2	0	1	1	1	1	1	0	0.00513571	0	0.0027398	0.00282741	0.00326168	0.00289084	0.00375601	0	0.000183418	0	9.785e-05	0.000100979	0.000116489	0.000103244	0.000134143
927	Ras-related protein Rab-7a	IPI00016342	23 kDa	0	1	1	1	2	0	2	0	0	0.00256786	0.00272294	0.0027398	0.00565483	0	0.00578168	0	0	0.000111646	0.000118389	0.000119122	0.000245862	0	0.000251378	0
928	Isoform 1 of Heterogeneous nuclear ribonucleoprotein A3	IPI00419373	40 kDa	2	2	1	1	0	0	1	1	0.00568214	0.00513571	0.00272294	0.0027398	0	0	0.00289084	0.00375601	0.000142054	0.000128393	6.80735e-05	6.8495e-05	0	0	7.2271e-05	9.39002e-05
929	50 kDa protein	IPI00328571	50 kDa	0	0	0	0	2	3	3	1	0	0	0	0	0.00565483	0.00978505	0.00867253	0.00375601	0	0	0	0	0.000113097	0.000195701	0.000173451	7.51202e-05
930	Keratin, type I cytoskeletal 19	IPI00479145	44 kDa	75	135	110	113	0	0	0	0	0.21308	0.346661	0.299523	0.309598	0	0	0	0	0.00484273	0.00787865	0.00680735	0.00703631	0	0	0	0
931	Torsin family protein C9orf167	IPI00015101	47 kDa	0	2	3	0	1	0	0	0	0	0.00513571	0.00816882	0	0.00282741	0	0	0	0	0.00010927	0.000173805	0	6.01578e-05	0	0	0
932	Microsomal glutathione S-transferase 1	IPI00021805	18 kDa	0	0	0	0	3	2	4	0	0	0	0	0	0.00848224	0.00652337	0.0115634	0	0	0	0	0	0.000471236	0.000362409	0.000642409	0
933	Fatty acid synthase	IPI00026781	273 kDa	0	0	0	2	0	0	0	3	0	0	0	0.0054796	0	0	0	0.011268	0	0	0	2.00718e-05	0	0	0	4.12748e-05
934	ATP-dependent DNA helicase 2 subunit 2	IPI00220834	83 kDa	0	1	0	0	1	0	2	1	0	0.00256786	0	0	0.00282741	0	0.00578168	0.00375601	0	3.0938e-05	0	0	3.40652e-05	0	6.96588e-05	4.52531e-05
935	Isoform 1 of Macrophage colony-stimulating factor 1	IPI00015881	60 kDa	0	0	0	0	1	0	3	2	0	0	0	0	0.00282741	0	0.00867253	0.00751202	0	0	0	0	4.71236e-05	0	0.000144542	0.0001252
936	Isoform 1 of Podocan-like protein 1	IPI00302227	57 kDa	4	4	1	1	0	0	0	0	0.0113643	0.0102714	0.00272294	0.0027398	0	0	0	0	0.000199373	0.0001802	4.77709e-05	4.80667e-05	0	0	0	0
937	Isoform Long of Spectrin beta chain, brain 1	IPI00005614	275 kDa	0	1	1	3	0	0	2	0	0	0.00256786	0.00272294	0.0082194	0	0	0.00578168	0	0	9.33766e-06	9.9016e-06	2.98887e-05	0	0	2.10243e-05	0
938	Adenosylhomocysteinase	IPI00012007	48 kDa	0	0	0	2	0	0	3	0	0	0	0	0.0054796	0	0	0.00867253	0	0	0	0	0.000114158	0	0	0.000180678	0
939	Isoform 2 of Retinoic acid receptor responder protein 1	IPI00410240	33 kDa	0	0	0	0	0	1	1	2	0	0	0	0	0	0.00326168	0.00289084	0.00751202	0	0	0	0	0	9.88389e-05	8.76013e-05	0.000227637
940	Tricarboxylate transport protein, mitochondrial	IPI00294159	34 kDa	0	1	0	2	0	0	0	0	0	0.00256786	0	0.0054796	0	0	0	0	0	7.55252e-05	0	0.000161165	0	0	0	0
941	Nuclear RNA export factor 1	IPI00033153	70 kDa	1	2	0	3	0	0	0	0	0.00284107	0.00513571	0	0.0082194	0	0	0	0	4.05867e-05	7.33673e-05	0	0.00011742	0	0	0	0
942	Beta-1,3-galactosyltransferase 6	IPI00064848	37 kDa	1	2	1	3	0	0	0	0	0.00284107	0.00513571	0.00272294	0.0082194	0	0	0	0	7.67857e-05	0.000138803	7.3593e-05	0.000222146	0	0	0	0
943	Ras-related protein R-Ras	IPI00020418	23 kDa	0	0	0	0	2	1	5	0	0	0	0	0	0.00565483	0.00326168	0.0144542	0	0	0	0	0	0.000245862	0.000141812	0.000628444	0
944	HMT1 hnRNP methyltransferase-like 2 isoform 1	IPI00018522	42 kDa	1	0	0	0	2	0	3	0	0.00284107	0	0	0	0.00565483	0	0.00867253	0	6.76445e-05	0	0	0	0.000134639	0	0.000206489	0
945	Stress-70 protein, mitochondrial	IPI00007765	74 kDa	0	5	0	1	0	0	0	1	0	0.0128393	0	0.0027398	0	0	0	0.00375601	0	0.000173504	0	3.70243e-05	0	0	0	5.07569e-05
946	H/ACA ribonucleoprotein complex subunit 4	IPI00221394	58 kDa	0	0	0	0	0	3	1	2	0	0	0	0	0	0.00978505	0.00289084	0.00751202	0	0	0	0	0	0.000168708	4.98421e-05	0.000129518
947	Torsin-1B	IPI00023137	38 kDa	0	0	0	0	0	3	0	3	0	0	0	0	0	0.00978505	0	0.011268	0	0	0	0	0	0.000257501	0	0.000296527
948	Dynein light chain Tctex-type 3	IPI00020885	13 kDa	0	0	0	0	2	0	3	0	0	0	0	0	0.00565483	0	0.00867253	0	0	0	0	0	0.000434987	0	0.000667117	0
949	Isoform 1 of Centromere protein V	IPI00761082	30 kDa	3	0	0	2	0	0	0	0	0.00852321	0	0	0.0054796	0	0	0	0	0.000284107	0	0	0.000182653	0	0	0	0
950	Aminoacyl tRNA synthetase complex-interacting multifunctional protein 2	IPI00011916	35 kDa	0	0	0	0	1	0	5	0	0	0	0	0	0.00282741	0	0.0144542	0	0	0	0	0	8.07833e-05	0	0.000412977	0
951	Isoform 1 of Epidermal growth factor receptor	IPI00018274	134 kDa	0	0	0	0	6	0	3	0	0	0	0	0	0.0169645	0	0.00867253	0	0	0	0	0	0.000126601	0	6.47203e-05	0
952	Charged multivesicular body protein 5	IPI00100796	25 kDa	0	0	0	0	1	0	9	0	0	0	0	0	0.00282741	0	0.0260176	0	0	0	0	0	0.000113097	0	0.0010407	0
953	Isoform 1 of Integral membrane protein 2C	IPI00016014	30 kDa	0	0	0	0	4	0	5	0	0	0	0	0	0.0113097	0	0.0144542	0	0	0	0	0	0.000376989	0	0.000481807	0
954	Heterogeneous nuclear ribonucleoprotein F	IPI00003881	46 kDa	0	0	0	0	0	0	0	6	0	0	0	0	0	0	0	0.0225361	0	0	0	0	0	0	0	0.000489914
955	Isoform A of DnaJ homolog subfamily B member 6	IPI00024523	36 kDa	0	1	0	0	2	2	2	1	0	0.00256786	0	0	0.00565483	0.00652337	0.00578168	0.00375601	0	7.13293e-05	0	0	0.000157079	0.000181205	0.000160602	0.000104334
956	1-phosphatidylinositol-4,5-bisphosphate phosphodiesterase delta-3	IPI00152701	89 kDa	1	2	0	0	1	0	0	1	0.00284107	0.00513571	0	0	0.00282741	0	0	0.00375601	3.19221e-05	5.77046e-05	0	0	3.17687e-05	0	0	4.22024e-05
957	Ferritin heavy chain	IPI00554521	21 kDa	0	0	1	1	1	1	2	0	0	0	0.00272294	0.0027398	0.00282741	0.00326168	0.00578168	0	0	0	0.000129664	0.000130467	0.000134639	0.000155318	0.000275318	0
958	28S ribosomal protein S22, mitochondrial	IPI00013146	41 kDa	1	0	3	2	1	0	0	1	0.00284107	0	0.00816882	0.0054796	0.00282741	0	0	0.00375601	6.92944e-05	0	0.00019924	0.000133649	6.89613e-05	0	0	9.161e-05
959	AP-3 complex subunit mu-1	IPI00032459	47 kDa	0	0	0	0	0	1	2	1	0	0	0	0	0	0.00326168	0.00578168	0.00375601	0	0	0	0	0	6.93976e-05	0.000123015	7.99151e-05
960	Translation initiation factor eIF-2B subunit alpha	IPI00221300	34 kDa	1	0	1	0	1	0	3	1	0.00284107	0	0.00272294	0	0.00282741	0	0.00867253	0.00375601	8.35609e-05	0	8.00865e-05	0	8.31593e-05	0	0.000255074	0.000110471
961	Ferritin	IPI00375676	21 kDa	0	1	0	0	2	3	1	1	0	0.00256786	0	0	0.00565483	0.00978505	0.00289084	0.00375601	0	0.000122279	0	0	0.000269278	0.000465955	0.000137659	0.000178858
962	Integrin beta-like protein 1	IPI00640865	54 kDa	0	2	1	0	2	0	1	0	0	0.00513571	0.00272294	0	0.00565483	0	0.00289084	0	0	9.51058e-05	5.04248e-05	0	0.000104719	0	5.35341e-05	0
963	Isoform 1 of Apoptotic chromatin condensation inducer in the nucleus	IPI00007334	152 kDa	0	0	0	0	3	2	0	1	0	0	0	0	0.00848224	0.00652337	0	0.00375601	0	0	0	0	5.58042e-05	4.29169e-05	0	2.47106e-05
964	Ribosome biogenesis regulatory protein homolog	IPI00014253	41 kDa	0	2	0	0	1	1	0	0	0	0.00513571	0	0	0.00282741	0.00326168	0	0	0	0.000125261	0	0	6.89613e-05	7.95533e-05	0	0
965	RNA-binding protein PNO1	IPI00024524	28 kDa	1	3	0	2	0	1	0	1	0.00284107	0.00770357	0	0.0054796	0	0.00326168	0	0.00375601	0.000101467	0.000275127	0	0.0001957	0	0.000116489	0	0.000134143
966	Splicing factor, arginine/serine-rich 2	IPI00005978	25 kDa	0	0	0	0	3	1	2	3	0	0	0	0	0.00848224	0.00326168	0.00578168	0.011268	0	0	0	0	0.00033929	0.000130467	0.000231267	0.000450721
967	Peptidyl-prolyl cis-trans isomerase FKBP10	IPI00303300	64 kDa	0	0	2	2	0	0	0	0	0	0	0.00544588	0.0054796	0	0	0	0	0	0	8.50919e-05	8.56188e-05	0	0	0	0
968	Mas-related G-protein coupled receptor member F	IPI00059513	38 kDa	0	0	0	0	0	1	2	2	0	0	0	0	0	0.00326168	0.00578168	0.00751202	0	0	0	0	0	8.58338e-05	0.00015215	0.000197685
969	CD9 antigen	IPI00215997	25 kDa	0	0	0	0	2	1	2	0	0	0	0	0	0.00565483	0.00326168	0.00578168	0	0	0	0	0	0.000226193	0.000130467	0.000231267	0
970	rRNA-processing protein FCF1 homolog	IPI00427242	23 kDa	1	3	0	1	0	0	0	0	0.00284107	0.00770357	0	0.0027398	0	0	0	0	0.000123525	0.000334938	0	0.000119122	0	0	0	0
971	Isoform 1 of DNA-directed RNA polymerases I and III subunit RPAC1	IPI00005179	39 kDa	0	0	0	0	2	0	4	1	0	0	0	0	0.00565483	0	0.0115634	0.00375601	0	0	0	0	0.000144996	0	0.000296497	9.63079e-05
972	Isoform 1 of Multivesicular body subunit 12A	IPI00744702	29 kDa	0	0	0	0	2	1	4	0	0	0	0	0	0.00565483	0.00326168	0.0115634	0	0	0	0	0	0.000194994	0.000112472	0.000398737	0
973	ubiquitin specific protease 9, X-linked isoform 4	IPI00003964	290 kDa	0	0	0	0	0	3	3	1	0	0	0	0	0	0.00978505	0.00867253	0.00375601	0	0	0	0	0	3.37416e-05	2.99053e-05	1.29518e-05
974	Isoform 1 of Sorting nexin-18	IPI00045219	69 kDa	0	0	0	1	1	0	6	1	0	0	0	0.0027398	0.00282741	0	0.0173451	0.00375601	0	0	0	3.97073e-05	4.0977e-05	0	0.000251378	5.44349e-05
975	Keratin-associated protein 13-2	IPI00373959	19 kDa	0	0	0	0	1	5	1	1	0	0	0	0	0.00282741	0.0163084	0.00289084	0.00375601	0	0	0	0	0.000148811	0.000858338	0.00015215	0.000197685
976	F-actin-capping protein subunit alpha-2	IPI00026182	33 kDa	2	0	0	0	3	0	6	0	0.00568214	0	0	0	0.00848224	0	0.0173451	0	0.000172186	0	0	0	0.000257038	0	0.000525608	0
977	Isoform 1 of NADH-cytochrome b5 reductase 3	IPI00328415	34 kDa	0	0	0	0	4	1	3	0	0	0	0	0	0.0113097	0.00326168	0.00867253	0	0	0	0	0	0.000332637	9.59319e-05	0.000255074	0
978	Isoform 1 of Rho guanine nucleotide exchange factor 6	IPI00014256	88 kDa	0	2	3	12	0	0	0	0	0	0.00513571	0.00816882	0.0328776	0	0	0	0	0	5.83604e-05	9.28275e-05	0.000373609	0	0	0	0
979	Isoform 1 of Peripheral plasma membrane protein CASK	IPI00514301	105 kDa	0	0	0	0	1	0	0	2	0	0	0	0	0.00282741	0	0	0.00751202	0	0	0	0	2.69278e-05	0	0	7.1543e-05
980	Keratin, type I cuticular Ha4	IPI00796822	49 kDa	0	0	4	0	0	15	10	7	0	0	0.0108918	0	0	0.0489253	0.0289084	0.0262921	0	0	0.000222281	0	0	0.000998475	0.000589968	0.000536573
981	13 kDa protein	IPI00646384	13 kDa	0	0	0	0	0	0	3	0	0	0	0	0	0	0	0.00867253	0	0	0	0	0	0	0	0.000667117	0
982	CTP synthase 1	IPI00290142	67 kDa	0	0	0	0	1	0	2	2	0	0	0	0	0.00282741	0	0.00578168	0.00751202	0	0	0	0	4.22002e-05	0	8.62938e-05	0.00011212
983	Transmembrane protein 214	IPI00477118	77 kDa	0	2	0	2	0	0	0	0	0	0.00513571	0	0.0054796	0	0	0	0	0	6.66975e-05	0	7.11637e-05	0	0	0	0
984	Putative uncharacterized protein DKFZp686H20196	IPI00423466	53 kDa	0	0	0	0	5	1	1	0	0	0	0	0	0.0141371	0.00326168	0.00289084	0	0	0	0	0	0.000266737	6.15412e-05	5.45442e-05	0
985	Ribose-5-phosphate isomerase	IPI00026513	33 kDa	0	0	0	0	4	0	3	0	0	0	0	0	0.0113097	0	0.00867253	0	0	0	0	0	0.000342717	0	0.000262804	0
986	Isoform 2 of Cytochrome b5	IPI00182933	11 kDa	0	0	0	0	4	0	1	0	0	0	0	0	0.0113097	0	0.00289084	0	0	0	0	0	0.00102815	0	0.000262804	0
987	63 kDa protein	IPI00871679	63 kDa	0	0	1	4	0	0	0	0	0	0	0.00272294	0.0109592	0	0	0	0	0	0	4.32213e-05	0.000173956	0	0	0	0
988	Ras-related protein Rab-23	IPI00008034	27 kDa	0	0	0	1	0	0	4	0	0	0	0	0.0027398	0	0	0.0115634	0	0	0	0	0.000101474	0	0	0.000428273	0
989	Membrane primary amine oxidase	IPI00004457	85 kDa	0	0	0	0	6	0	0	0	0	0	0	0	0.0169645	0	0	0	0	0	0	0	0.000199582	0	0	0
990	Isoform 1 of Cystathionine beta-synthase	IPI00219352	61 kDa	0	0	0	0	0	0	0	7	0	0	0	0	0	0	0	0.0262921	0	0	0	0	0	0	0	0.000431017
991	Aflatoxin B1 aldehyde reductase member 2	IPI00305978	40 kDa	0	0	0	2	0	0	0	1	0	0	0	0.0054796	0	0	0	0.00375601	0	0	0	0.00013699	0	0	0	9.39002e-05
992	Protein tyrosine phosphatase type IVA 1	IPI00020164	20 kDa	2	1	2	1	0	0	0	0	0.00568214	0.00256786	0.00544588	0.0027398	0	0	0	0	0.000284107	0.000128393	0.000272294	0.00013699	0	0	0	0
993	Spermidine synthase	IPI00292020	34 kDa	0	0	0	1	3	0	2	0	0	0	0	0.0027398	0.00848224	0	0.00578168	0	0	0	0	8.05824e-05	0.000249478	0	0.00017005	0
994	Isoform 1 of Ras-related protein Rab-34	IPI00328180	29 kDa	0	0	0	1	1	1	2	2	0	0	0	0.0027398	0.00282741	0.00326168	0.00578168	0.00751202	0	0	0	9.44759e-05	9.74971e-05	0.000112472	0.000199368	0.000259035
995	Translation initiation factor eIF-2B subunit epsilon	IPI00011898	80 kDa	0	0	0	0	2	1	2	1	0	0	0	0	0.00565483	0.00326168	0.00578168	0.00375601	0	0	0	0	7.06854e-05	4.07711e-05	7.2271e-05	4.69501e-05
996	Translation initiation factor eIF-2B subunit beta	IPI00028083	39 kDa	0	0	0	0	1	1	3	2	0	0	0	0	0.00282741	0.00326168	0.00867253	0.00751202	0	0	0	0	7.24978e-05	8.36329e-05	0.000222372	0.000192616
997	UPF0027 protein C22orf28	IPI00550689	55 kDa	0	2	1	3	0	0	1	0	0	0.00513571	0.00272294	0.0082194	0	0	0.00289084	0	0	9.33766e-05	4.9508e-05	0.000149444	0	0	5.25608e-05	0
998	Keratin-associated protein 13-4	IPI00373947	18 kDa	0	0	4	0	2	2	0	0	0	0	0.0108918	0	0.00565483	0.00652337	0	0	0	0	0.000605098	0	0.000314157	0.000362409	0	0
999	Ras-related protein Rab-3B	IPI00300562	25 kDa	0	0	0	0	9	0	16	4	0	0	0	0	0.0254467	0	0.0462535	0.015024	0	0	0	0	0.00101787	0	0.00185014	0.000600962
1000	Isoform 1 of Tissue-type plasminogen activator	IPI00019590	63 kDa	0	0	0	1	2	0	2	2	0	0	0	0.0027398	0.00565483	0	0.00578168	0.00751202	0	0	0	4.34889e-05	8.97592e-05	0	9.17728e-05	0.000119238
1001	EGF-containing fibulin-like extracellular matrix protein 2	IPI00296058	49 kDa	0	2	2	1	0	0	0	0	0	0.00513571	0.00544588	0.0027398	0	0	0	0	0	0.00010481	0.00011114	5.59143e-05	0	0	0	0
1002	Isoform 1 of DNA-3-methyladenine glycosylase	IPI00295497	33 kDa	2	2	0	2	0	0	0	0	0.00568214	0.00513571	0	0.0054796	0	0	0	0	0.000172186	0.000155628	0	0.000166049	0	0	0	0
1003	Ribosome production factor 1	IPI00292221	40 kDa	0	0	2	0	0	1	0	0	0	0	0.00544588	0	0	0.00326168	0	0	0	0	0.000136147	0	0	8.15421e-05	0	0
1004	Isoform 2 of LisH domain-containing protein ARMC9	IPI00216484	76 kDa	0	0	0	0	1	2	2	0	0	0	0	0	0.00282741	0.00652337	0.00578168	0	0	0	0	0	3.72028e-05	8.58338e-05	7.60748e-05	0
1005	Pumilio domain-containing protein C14orf21	IPI00216999	69 kDa	1	3	1	2	0	0	0	0	0.00284107	0.00770357	0.00272294	0.0054796	0	0	0	0	4.11749e-05	0.000111646	3.94629e-05	7.94145e-05	0	0	0	0
1006	Cysteine and glycine-rich protein 2	IPI00002824	21 kDa	2	1	0	3	0	0	0	0	0.00568214	0.00256786	0	0.0082194	0	0	0	0	0.000270578	0.000122279	0	0.0003914	0	0	0	0
1007	Serine/threonine-protein phosphatase 4 catalytic subunit	IPI00012833	35 kDa	0	0	0	0	4	0	6	1	0	0	0	0	0.0113097	0	0.0173451	0.00375601	0	0	0	0	0.000323133	0	0.000495573	0.000107315
1008	Parathymosin	IPI00550020	12 kDa	1	0	0	0	2	0	3	0	0.00284107	0	0	0	0.00565483	0	0.00867253	0	0.000236756	0	0	0	0.000471236	0	0.00072271	0
1009	Calponin-3	IPI00216682	36 kDa	0	2	1	4	0	0	0	0	0	0.00513571	0.00272294	0.0109592	0	0	0	0	0	0.000142659	7.56372e-05	0.000304422	0	0	0	0
1010	Isoform Short of RNA-binding protein FUS	IPI00221354	53 kDa	0	3	0	1	0	0	0	0	0	0.00770357	0	0.0027398	0	0	0	0	0	0.00014535	0	5.16944e-05	0	0	0	0
1011	Isoform 2 of Nucleolar protein 10	IPI00016494	75 kDa	1	3	0	0	0	0	0	0	0.00284107	0.00770357	0	0	0	0	0	0	3.78809e-05	0.000102714	0	0	0	0	0	0
1012	Isoform 1 of Dedicator of cytokinesis protein 7	IPI00513791	243 kDa	0	0	0	0	0	0	3	0	0	0	0	0	0	0	0.00867253	0	0	0	0	0	0	0	3.56894e-05	0
1013	Cystatin-C	IPI00032293	16 kDa	1	2	1	0	0	0	0	0	0.00284107	0.00513571	0.00272294	0	0	0	0	0	0.000177567	0.000320982	0.000170184	0	0	0	0	0
1014	Isoform 3 of Heterogeneous nuclear ribonucleoprotein Q	IPI00402183	63 kDa	0	4	1	1	0	0	0	0	0	0.0102714	0.00272294	0.0027398	0	0	0	0	0	0.000163038	4.32213e-05	4.34889e-05	0	0	0	0
1015	SNARE-associated protein Snapin	IPI00018331	15 kDa	0	0	0	0	2	0	4	0	0	0	0	0	0.00565483	0	0.0115634	0	0	0	0	0	0.000376989	0	0.000770891	0
1016	Cellular retinoic acid-binding protein 2	IPI00216088	16 kDa	0	0	0	0	0	0	2	0	0	0	0	0	0	0	0.00578168	0	0	0	0	0	0	0	0.000361355	0
1017	Thioredoxin domain-containing protein 5	IPI00171438	48 kDa	2	1	1	1	0	0	0	0	0.00568214	0.00256786	0.00272294	0.0027398	0	0	0	0	0.000118378	5.3497e-05	5.67279e-05	5.70792e-05	0	0	0	0
1018	Interleukin enhancer-binding factor 2	IPI00005198	43 kDa	0	1	0	0	2	0	0	1	0	0.00256786	0	0	0.00565483	0	0	0.00375601	0	5.97176e-05	0	0	0.000131508	0	0	8.73491e-05
1019	Isoform 2 of Protein disulfide-isomerase A6	IPI00299571	54 kDa	0	0	1	1	2	0	3	0	0	0	0.00272294	0.0027398	0.00565483	0	0.00867253	0	0	0	5.04248e-05	5.07371e-05	0.000104719	0	0.000160602	0
1020	DNA-directed RNA polymerases I, II, and III subunit RPABC3	IPI00003309	17 kDa	0	0	0	0	1	1	3	1	0	0	0	0	0.00282741	0.00326168	0.00867253	0.00375601	0	0	0	0	0.000166319	0.000191864	0.000510149	0.000220942
1021	Isoform 1 of Serpin B3	IPI00022204	45 kDa	0	0	0	1	0	2	0	1	0	0	0	0.0027398	0	0.00652337	0	0.00375601	0	0	0	6.08845e-05	0	0.000144964	0	8.34669e-05
1022	UPF0568 protein C14orf166	IPI00006980	28 kDa	0	1	0	3	0	1	0	0	0	0.00256786	0	0.0082194	0	0.00326168	0	0	0	9.17091e-05	0	0.00029355	0	0.000116489	0	0
1023	tRNA methyltransferase 112 homolog	IPI00009010	14 kDa	1	2	1	1	0	0	0	0	0.00284107	0.00513571	0.00272294	0.0027398	0	0	0	0	0.000202934	0.000366837	0.000194496	0.0001957	0	0	0	0
1024	Isoform 1 of MAP/microtubule affinity-regulating kinase 3	IPI00183118	87 kDa	0	3	1	1	0	0	0	0	0	0.00770357	0.00272294	0.0027398	0	0	0	0	0	8.85467e-05	3.12982e-05	3.1492e-05	0	0	0	0
1025	Vacuolar protein sorting-associated protein 37B	IPI00002926	31 kDa	0	0	0	0	0	2	3	1	0	0	0	0	0	0.00652337	0.00867253	0.00375601	0	0	0	0	0	0.000210431	0.000279759	0.000121162
1026	Leucine-rich repeat-containing protein 59	IPI00396321	35 kDa	1	0	0	3	0	0	0	0	0.00284107	0	0	0.0082194	0	0	0	0	8.11734e-05	0	0	0.00023484	0	0	0	0
1027	Prohibitin-2	IPI00027252	33 kDa	0	0	1	0	3	0	1	0	0	0	0.00272294	0	0.00848224	0	0.00289084	0	0	0	8.25134e-05	0	0.000257038	0	8.76013e-05	0
1028	Isoform 1 of GPI transamidase component PIG-T	IPI00100030	66 kDa	2	0	0	0	0	0	2	0	0.00568214	0	0	0	0	0	0.00578168	0	8.6093e-05	0	0	0	0	0	8.76013e-05	0
1029	Exosome complex exonuclease RRP4	IPI00015905	33 kDa	1	0	0	0	1	0	3	0	0.00284107	0	0	0	0.00282741	0	0.00867253	0	8.6093e-05	0	0	0	8.56792e-05	0	0.000262804	0
1030	Tumor necrosis factor-inducible gene 6 protein	IPI00303341	31 kDa	0	0	0	0	2	0	2	0	0	0	0	0	0.00565483	0	0.00578168	0	0	0	0	0	0.000182414	0	0.000186506	0
1031	Isoform 1 of Importin-4	IPI00156374	119 kDa	0	0	0	0	2	0	2	0	0	0	0	0	0.00565483	0	0.00578168	0	0	0	0	0	4.75196e-05	0	4.85856e-05	0
1032	Proliferating cell nuclear antigen	IPI00021700	29 kDa	0	0	0	0	2	0	2	0	0	0	0	0	0.00565483	0	0.00578168	0	0	0	0	0	0.000194994	0	0.000199368	0
1033	Complement C1q tumor necrosis factor-related protein 5	IPI00024105	25 kDa	0	0	0	0	2	0	2	0	0	0	0	0	0.00565483	0	0.00578168	0	0	0	0	0	0.000226193	0	0.000231267	0
1034	ADP-ribosylation factor-like protein 2	IPI00003326	21 kDa	0	0	0	0	4	0	2	0	0	0	0	0	0.0113097	0	0.00578168	0	0	0	0	0	0.000538555	0	0.000275318	0
1035	Importin subunit alpha-1	IPI00303292	60 kDa	0	0	0	0	3	0	1	0	0	0	0	0	0.00848224	0	0.00289084	0	0	0	0	0	0.000141371	0	4.81807e-05	0
1036	Antithrombin-III	IPI00032179	53 kDa	0	0	0	0	2	0	1	0	0	0	0	0	0.00565483	0	0.00289084	0	0	0	0	0	0.000106695	0	5.45442e-05	0
1037	BRISC complex subunit Abro1	IPI00299517	47 kDa	0	0	0	0	1	0	2	0	0	0	0	0	0.00282741	0	0.00578168	0	0	0	0	0	6.01578e-05	0	0.000123015	0
1038	inter-alpha trypsin inhibitor heavy chain precursor 5 isoform 1	IPI00328829	106 kDa	0	0	0	0	0	2	0	0	0	0	0	0	0	0.00652337	0	0	0	0	0	0	0	6.15412e-05	0	0
1039	Polymeric immunoglobulin receptor	IPI00004573	83 kDa	0	3	0	0	1	0	0	0	0	0.00770357	0	0	0.00282741	0	0	0	0	9.28141e-05	0	0	3.40652e-05	0	0	0
1040	Cartilage intermediate layer protein 2 precursor	IPI00216780	127 kDa	0	0	0	0	3	0	1	0	0	0	0	0	0.00848224	0	0.00289084	0	0	0	0	0	6.67893e-05	0	2.27625e-05	0
1041	Isoform A of Protein CutA	IPI00034319	21 kDa	0	0	1	2	0	0	0	0	0	0	0.00272294	0.0054796	0	0	0	0	0	0	0.000129664	0.000260933	0	0	0	0
1042	Microtubule-associated protein RP/EB family member 1	IPI00017596	30 kDa	0	1	0	2	0	0	0	0	0	0.00256786	0	0.0054796	0	0	0	0	0	8.55952e-05	0	0.000182653	0	0	0	0
1043	glycogen synthase 1 (muscle) isoform 2	IPI00157144	76 kDa	0	0	0	0	2	0	4	0	0	0	0	0	0.00565483	0	0.0115634	0	0	0	0	0	7.44056e-05	0	0.00015215	0
1044	Isoform 2 of AP-2 complex subunit alpha-2	IPI00016621	104 kDa	0	0	0	0	0	3	16	0	0	0	0	0	0	0.00978505	0.0462535	0	0	0	0	0	0	9.40871e-05	0.000444745	0
1045	Ras-related protein Rab-32	IPI00014377	25 kDa	0	0	0	0	4	0	3	0	0	0	0	0	0.0113097	0	0.00867253	0	0	0	0	0	0.000452386	0	0.000346901	0
1046	Isoform 1 of Sequestosome-1	IPI00179473	48 kDa	0	0	0	0	2	0	4	0	0	0	0	0	0.00565483	0	0.0115634	0	0	0	0	0	0.000117809	0	0.000240903	0
1047	Proteolipid protein 2	IPI00030362	17 kDa	0	0	0	0	2	0	4	0	0	0	0	0	0.00565483	0	0.0115634	0	0	0	0	0	0.000332637	0	0.000680198	0
1048	Eukaryotic initiation factor 4A-III	IPI00009328	47 kDa	0	0	0	0	6	0	1	0	0	0	0	0	0.0169645	0	0.00289084	0	0	0	0	0	0.000360947	0	6.15073e-05	0
1049	CD2-associated protein	IPI00412771	71 kDa	0	4	0	0	0	0	0	0	0	0.0102714	0	0	0	0	0	0	0	0.000144668	0	0	0	0	0	0
1050	Serotransferrin	IPI00022463	77 kDa	0	0	0	0	6	0	0	0	0	0	0	0	0.0169645	0	0	0	0	0	0	0	0.000220318	0	0	0
1051	Isoform 1 of Kinesin-like protein KIF23	IPI00291579	110 kDa	0	6	0	0	0	0	0	0	0	0.0154071	0	0	0	0	0	0	0	0.000140065	0	0	0	0	0	0
1052	Heterogeneous nuclear ribonucleoprotein H2	IPI00026230	49 kDa	0	0	0	0	0	0	0	4	0	0	0	0	0	0	0	0.015024	0	0	0	0	0	0	0	0.000306613
1053	Ribosomal L1 domain-containing protein 1	IPI00008708	55 kDa	2	1	1	1	0	1	0	0	0.00568214	0.00256786	0.00272294	0.0027398	0	0.00326168	0	0	0.000103312	4.66883e-05	4.9508e-05	4.98146e-05	0	5.93034e-05	0	0
1054	Exosome complex exonuclease MTR3	IPI00073602	28 kDa	1	0	1	0	1	0	2	0	0.00284107	0	0.00272294	0	0.00282741	0	0.00578168	0	0.000101467	0	9.72479e-05	0	0.000100979	0	0.000206489	0
1055	cDNA FLJ58980, highly similar to Sideroflexin-3	IPI00871988	36 kDa	1	2	0	0	1	0	0	0	0.00284107	0.00513571	0	0	0.00282741	0	0	0	7.89186e-05	0.000142659	0	0	7.85393e-05	0	0	0
1056	Splicing factor U2AF 35 kDa subunit	IPI00005613	28 kDa	0	0	0	0	0	2	1	0	0	0	0	0	0	0.00652337	0.00289084	0	0	0	0	0	0	0.000232977	0.000103244	0
1057	28S ribosomal protein S18a, mitochondrial	IPI00018691	22 kDa	2	0	0	1	2	0	0	0	0.00568214	0	0	0.0027398	0.00565483	0	0	0	0.000258279	0	0	0.000124536	0.000257038	0	0	0
1058	Methylosome protein 50	IPI00012202	37 kDa	0	1	0	0	1	0	2	1	0	0.00256786	0	0	0.00282741	0	0.00578168	0.00375601	0	6.94015e-05	0	0	7.64166e-05	0	0.000156262	0.000101514
1059	Tyrosine-protein kinase CSK	IPI00013212	51 kDa	0	2	1	3	0	0	0	0	0	0.00513571	0.00272294	0.0082194	0	0	0	0	0	0.0001007	5.3391e-05	0.000161165	0	0	0	0
1060	Protein pelota homolog	IPI00106698	43 kDa	0	0	0	0	2	0	3	1	0	0	0	0	0.00565483	0	0.00867253	0.00375601	0	0	0	0	0.000131508	0	0.000201687	8.73491e-05
1061	Isoform 1 of Protein numb homolog	IPI00028059	71 kDa	0	1	0	2	0	0	1	0	0	0.00256786	0	0.0054796	0	0	0.00289084	0	0	3.6167e-05	0	7.71775e-05	0	0	4.07161e-05	0
1062	Coiled-coil domain-containing protein 124	IPI00060627	26 kDa	1	2	0	2	0	0	0	0	0.00284107	0.00513571	0	0.0054796	0	0	0	0	0.000109272	0.000197527	0	0.000210754	0	0	0	0
1063	UPF0672 protein C3orf58	IPI00168631	49 kDa	0	3	1	1	0	0	0	0	0	0.00770357	0.00272294	0.0027398	0	0	0	0	0	0.000157216	5.55702e-05	5.59143e-05	0	0	0	0
1064	Heterogeneous nuclear ribonucleoprotein A0	IPI00011913	31 kDa	1	0	0	2	0	0	0	0	0.00284107	0	0	0.0054796	0	0	0	0	9.16474e-05	0	0	0.000176761	0	0	0	0
1065	Isoform 1 of PDZ domain-containing protein 11	IPI00550841	16 kDa	1	1	3	0	0	0	0	0	0.00284107	0.00256786	0.00816882	0	0	0	0	0	0.000177567	0.000160491	0.000510551	0	0	0	0	0
1066	Isoform 1 of UPF0485 protein C1orf144	IPI00470594	17 kDa	0	0	1	2	0	0	0	0	0	0	0.00272294	0.0054796	0	0	0	0	0	0	0.000160173	0.00032233	0	0	0	0
1067	Peptidyl-prolyl cis-trans isomerase FKBP1A	IPI00873810	12 kDa	1	0	1	2	0	0	0	0	0.00284107	0	0.00272294	0.0054796	0	0	0	0	0.000236756	0	0.000226912	0.000456634	0	0	0	0
1068	Isoform 1 of Leucine zipper protein 1	IPI00296830	120 kDa	0	0	1	2	0	0	0	0	0	0	0.00272294	0.0054796	0	0	0	0	0	0	2.26912e-05	4.56634e-05	0	0	0	0
1069	Stanniocalcin-1	IPI00005564	28 kDa	0	0	0	0	1	0	2	0	0	0	0	0	0.00282741	0	0.00578168	0	0	0	0	0	0.000100979	0	0.000206489	0
1070	Pre-rRNA-processing protein TSR1 homolog	IPI00292894	92 kDa	1	3	0	1	0	0	0	0	0.00284107	0.00770357	0	0.0027398	0	0	0	0	3.08812e-05	8.37344e-05	0	2.97804e-05	0	0	0	0
1071	Peflin	IPI00018235	30 kDa	0	0	0	0	1	0	3	1	0	0	0	0	0.00282741	0	0.00867253	0.00375601	0	0	0	0	9.42472e-05	0	0.000289084	0.0001252
1072	Transcription elongation factor B polypeptide 1	IPI00300341	12 kDa	1	0	0	0	1	0	3	0	0.00284107	0	0	0	0.00282741	0	0.00867253	0	0.000236756	0	0	0	0.000235618	0	0.00072271	0
1073	Beta-type platelet-derived growth factor receptor	IPI00015902	124 kDa	0	0	0	0	1	1	6	0	0	0	0	0	0.00282741	0.00326168	0.0173451	0	0	0	0	0	2.28017e-05	2.63039e-05	0.000139879	0
1074	Ras-related protein Rab-18	IPI00014577	23 kDa	0	0	0	0	1	0	3	0	0	0	0	0	0.00282741	0	0.00867253	0	0	0	0	0	0.000122931	0	0.000377066	0
1075	Vesicle-associated membrane protein 5	IPI00293756	13 kDa	0	0	0	0	2	1	2	0	0	0	0	0	0.00565483	0.00326168	0.00578168	0	0	0	0	0	0.000434987	0.000250899	0.000444745	0
1076	TUBB6 protein	IPI00646779	50 kDa	0	0	0	17	282	0	335	0	0	0	0	0.0465766	0.797331	0	0.968432	0	0	0	0	0.000931532	0.0159466	0	0.0193686	0
1077	GTPase NRas	IPI00000005	21 kDa	0	0	0	0	3	0	3	0	0	0	0	0	0.00848224	0	0.00867253	0	0	0	0	0	0.000403916	0	0.000412977	0
1078	Isoform 2 of Gamma-adducin	IPI00004408	79 kDa	0	1	0	3	0	0	0	0	0	0.00256786	0	0.0082194	0	0	0	0	0	3.25045e-05	0	0.000104043	0	0	0	0
1079	Isoform 2 of Phospholipid transfer protein	IPI00217778	49 kDa	0	0	0	0	0	0	0	2	0	0	0	0	0	0	0	0.00751202	0	0	0	0	0	0	0	0.000153307
1080	Cystatin-A	IPI00032325	11 kDa	0	0	0	0	0	1	0	3	0	0	0	0	0	0.00326168	0	0.011268	0	0	0	0	0	0.000296517	0	0.00102437
1081	Importin-9	IPI00185146	116 kDa	0	0	0	0	1	0	3	0	0	0	0	0	0.00282741	0	0.00867253	0	0	0	0	0	2.43743e-05	0	7.47632e-05	0
1082	Keratin, type II cuticular Hb2	IPI00300053	57 kDa	0	2	0	1	0	0	0	0	0	0.00513571	0	0.0027398	0	0	0	0	0	9.01002e-05	0	4.80667e-05	0	0	0	0
1083	Ras-related protein Rap-2b	IPI00018364	21 kDa	0	0	0	0	2	0	4	0	0	0	0	0	0.00565483	0	0.0115634	0	0	0	0	0	0.000269278	0	0.000550637	0
1084	Isoform 2 of COP9 signalosome complex subunit 2	IPI00018813	52 kDa	0	0	0	0	1	0	2	0	0	0	0	0	0.00282741	0	0.00578168	0	0	0	0	0	5.43734e-05	0	0.000111186	0
1085	Isoform 1 of Protein phosphatase 1 regulatory subunit 12A	IPI00183002	115 kDa	0	0	0	0	1	0	4	0	0	0	0	0	0.00282741	0	0.0115634	0	0	0	0	0	2.45862e-05	0	0.000100551	0
1086	Translational activator GCN1	IPI00001159	293 kDa	0	0	0	0	0	0	4	0	0	0	0	0	0	0	0.0115634	0	0	0	0	0	0	0	3.94654e-05	0
1087	26S proteasome non-ATPase regulatory subunit 5	IPI00002134	56 kDa	0	0	0	0	0	0	4	0	0	0	0	0	0	0	0.0115634	0	0	0	0	0	0	0	0.000206489	0
1088	PDZ domain-containing protein GIPC1	IPI00024705	36 kDa	0	0	0	0	1	0	2	2	0	0	0	0	0.00282741	0	0.00578168	0.00751202	0	0	0	0	7.85393e-05	0	0.000160602	0.000208667
1089	Zinc finger protein 22	IPI00215890	26 kDa	2	2	0	0	0	1	0	0	0.00568214	0.00513571	0	0	0	0.00326168	0	0	0.000218544	0.000197527	0	0	0	0.000125449	0	0
1090	Nucleolar GTP-binding protein 1	IPI00385042	74 kDa	2	2	0	1	0	0	0	0	0.00568214	0.00513571	0	0.0027398	0	0	0	0	7.67857e-05	6.94015e-05	0	3.70243e-05	0	0	0	0
1091	Isoform 3 of Protein tweety homolog 3	IPI00877061	38 kDa	0	0	0	0	1	0	2	2	0	0	0	0	0.00282741	0	0.00578168	0.00751202	0	0	0	0	7.44056e-05	0	0.00015215	0.000197685
1092	SAP domain-containing ribonucleoprotein	IPI00014938	24 kDa	0	2	1	1	0	0	0	0	0	0.00513571	0.00272294	0.0027398	0	0	0	0	0	0.000213988	0.000113456	0.000114158	0	0	0	0
1093	Isoform Long of 60 kDa SS-A/Ro ribonucleoprotein	IPI00019450	61 kDa	0	0	0	0	2	1	1	0	0	0	0	0	0.00565483	0.00326168	0.00289084	0	0	0	0	0	9.27021e-05	5.34702e-05	4.73908e-05	0
1094	Hemoglobin subunit beta	IPI00654755	16 kDa	0	0	2	1	1	1	0	0	0	0	0.00544588	0.0027398	0.00282741	0.00326168	0	0	0	0	0.000340368	0.000171238	0.000176713	0.000203855	0	0
1095	TDP43	IPI00025815	45 kDa	0	1	0	2	0	0	1	0	0	0.00256786	0	0.0054796	0	0	0.00289084	0	0	5.70635e-05	0	0.000121769	0	0	6.42409e-05	0
1096	Vitronectin	IPI00298971	54 kDa	1	2	0	1	0	0	0	0	0.00284107	0.00513571	0	0.0027398	0	0	0	0	5.26124e-05	9.51058e-05	0	5.07371e-05	0	0	0	0
1097	EH domain-containing protein 4	IPI00005578	61 kDa	0	1	0	1	0	0	4	0	0	0.00256786	0	0.0027398	0	0	0.0115634	0	0	4.2096e-05	0	4.49148e-05	0	0	0.000189563	0
1098	Ezrin	IPI00843975	69 kDa	17	17	0	19	0	0	0	0	0.0482982	0.0436535	0	0.0520562	0	0	0	0	0.000699974	0.00063266	0	0.000754438	0	0	0	0
1099	Isoform 1 of Putative helicase MOV-10	IPI00444452	114 kDa	0	0	0	0	2	0	1	1	0	0	0	0	0.00565483	0	0.00289084	0.00375601	0	0	0	0	4.96038e-05	0	2.53583e-05	3.29475e-05
1100	Isoform 2C2A of Collagen alpha-2(VI) chain	IPI00220613	97 kDa	289	249	360	0	0	0	0	0	0.821069	0.639396	0.980259	0	0	0	0	0	0.00846463	0.00659171	0.0101058	0	0	0	0	0
1101	Membrane-associated progesterone receptor component 2	IPI00005202	26 kDa	0	0	0	0	2	0	2	0	0	0	0	0	0.00565483	0	0.00578168	0	0	0	0	0	0.000217493	0	0.000222372	0
1102	Isoform 2 of Rho GTPase-activating protein 7	IPI00335259	171 kDa	0	1	0	2	0	0	0	0	0	0.00256786	0	0.0054796	0	0	0	0	0	1.50167e-05	0	3.20445e-05	0	0	0	0
1103	Phosphomevalonate kinase	IPI00220648	22 kDa	0	0	0	0	2	0	2	0	0	0	0	0	0.00565483	0	0.00578168	0	0	0	0	0	0.000257038	0	0.000262804	0
1104	Isoform 1 of Translation initiation factor eIF-2B subunit delta	IPI00005979	58 kDa	0	0	0	0	2	0	3	0	0	0	0	0	0.00565483	0	0.00867253	0	0	0	0	0	9.74971e-05	0	0.000149526	0
1105	Isoform 1 of Lys-63-specific deubiquitinase BRCC36	IPI00871617	33 kDa	0	0	0	0	3	0	2	0	0	0	0	0	0.00848224	0	0.00578168	0	0	0	0	0	0.000257038	0	0.000175203	0
1106	Vacuolar protein-sorting-associated protein 25	IPI00031655	21 kDa	0	0	0	0	1	0	2	0	0	0	0	0	0.00282741	0	0.00578168	0	0	0	0	0	0.000134639	0	0.000275318	0
1107	Complement C1s subcomponent	IPI00017696	77 kDa	0	0	0	0	2	0	1	0	0	0	0	0	0.00565483	0	0.00289084	0	0	0	0	0	7.34393e-05	0	3.75434e-05	0
1108	WD repeat-containing protein 61	IPI00019269	34 kDa	0	0	0	0	2	0	2	0	0	0	0	0	0.00565483	0	0.00578168	0	0	0	0	0	0.000166319	0	0.00017005	0
1109	Isoform 1 of Protein phosphatase 1 regulatory subunit 7	IPI00033600	42 kDa	0	0	0	0	1	0	2	0	0	0	0	0	0.00282741	0	0.00578168	0	0	0	0	0	6.73194e-05	0	0.000137659	0
1110	transforming growth factor, beta receptor III	IPI00304865	94 kDa	0	0	0	0	0	3	1	0	0	0	0	0	0	0.00978505	0.00289084	0	0	0	0	0	0	0.000104096	3.07536e-05	0
1111	26S proteasome non-ATPase regulatory subunit 10	IPI00003565	24 kDa	0	0	0	0	2	0	2	0	0	0	0	0	0.00565483	0	0.00578168	0	0	0	0	0	0.000235618	0	0.000240903	0
1112	Isoform 1 of Mps one binder kinase activator-like 3	IPI00386122	26 kDa	0	0	0	0	2	0	0	0	0	0	0	0	0.00565483	0	0	0	0	0	0	0	0.000217493	0	0	0
1113	Isoform 1 of Uncharacterized protein C1orf77	IPI00300990	26 kDa	0	1	0	0	3	0	0	0	0	0.00256786	0	0	0.00848224	0	0	0	0	9.87637e-05	0	0	0.00032624	0	0	0
1114	General transcription factor IIF subunit 2	IPI00477686	28 kDa	0	0	0	0	3	0	1	0	0	0	0	0	0.00848224	0	0.00289084	0	0	0	0	0	0.000302937	0	0.000103244	0
1115	Histone deacetylase 1	IPI00013774	55 kDa	2	0	0	0	1	0	0	0	0.00568214	0	0	0	0.00282741	0	0	0	0.000103312	0	0	0	5.14075e-05	0	0	0
1116	Histone H2A type 2-B	IPI00216730	14 kDa	63	62	82	0	0	0	0	0	0.178987	0.159207	0.223281	0	0	0	0	0	0.0127848	0.0113719	0.0159487	0	0	0	0	0
1117	Lamin-B2	IPI00009771	70 kDa	0	3	0	0	0	0	1	0	0	0.00770357	0	0	0	0	0.00289084	0	0	0.000110051	0	0	0	0	4.12977e-05	0
1118	Isoform 1 of Nucleolar protein 14	IPI00022613	98 kDa	0	2	0	1	0	0	0	0	0	0.00513571	0	0.0027398	0	0	0	0	0	5.24052e-05	0	2.79572e-05	0	0	0	0
1119	Phospholipid scramblase 1	IPI00005181	35 kDa	0	0	0	0	1	0	4	0	0	0	0	0	0.00282741	0	0.0115634	0	0	0	0	0	8.07833e-05	0	0.000330382	0
1120	Isoform 1 of Ubiquitin-conjugating enzyme E2 Z	IPI00011996	38 kDa	0	0	0	0	2	0	0	0	0	0	0	0	0.00565483	0	0	0	0	0	0	0	0.000148811	0	0	0
1121	BRO1 domain-containing protein BROX	IPI00065500	46 kDa	0	0	0	0	0	0	4	0	0	0	0	0	0	0	0.0115634	0	0	0	0	0	0	0	0.000251378	0
1122	60 kDa heat shock protein, mitochondrial	IPI00784154	61 kDa	0	0	0	0	0	0	0	4	0	0	0	0	0	0	0	0.015024	0	0	0	0	0	0	0	0.000246296
1123	Complement C3 (Fragment)	IPI00783987	187 kDa	0	0	0	0	2	0	0	0	0	0	0	0	0.00565483	0	0	0	0	0	0	0	3.02397e-05	0	0	0
1124	shroom family member 3 protein	IPI00152881	217 kDa	0	0	0	3	0	0	0	0	0	0	0	0.0082194	0	0	0	0	0	0	0	3.78774e-05	0	0	0	0
1125	Protein RCC2	IPI00465044	56 kDa	0	0	0	0	0	0	0	5	0	0	0	0	0	0	0	0.01878	0	0	0	0	0	0	0	0.000335358
1126	Beta-parvin	IPI00043083	42 kDa	0	1	2	5	0	0	0	0	0	0.00256786	0.00544588	0.013699	0	0	0	0	0	6.11394e-05	0.000129664	0.000326167	0	0	0	0
1127	Voltage-dependent anion-selective channel protein 1	IPI00216308	31 kDa	0	1	0	2	1	0	0	0	0	0.00256786	0	0.0054796	0.00282741	0	0	0	0	8.28341e-05	0	0.000176761	9.12069e-05	0	0	0
1128	cDNA FLJ61158, highly similar to ADP-ribosylation factor-like protein 8B	IPI00789069	21 kDa	0	0	0	0	1	0	2	0	0	0	0	0	0.00282741	0	0.00578168	0	0	0	0	0	0.000134639	0	0.000275318	0
1129	Isoform 1 of Catenin alpha-1	IPI00215948	100 kDa	0	0	0	2	1	0	0	0	0	0	0	0.0054796	0.00282741	0	0	0	0	0	0	5.4796e-05	2.82741e-05	0	0	0
1130	Ras-related protein Rab-5A	IPI00023510	24 kDa	0	0	0	0	6	0	5	1	0	0	0	0	0.0169645	0	0.0144542	0.00375601	0	0	0	0	0.000706854	0	0.000602259	0.0001565
1131	Isoform 2 of Tyrosine-protein kinase-like 7	IPI00170814	114 kDa	0	0	0	0	2	1	0	0	0	0	0	0	0.00565483	0.00326168	0	0	0	0	0	0	4.96038e-05	2.86113e-05	0	0
1132	Golgi resident protein GCP60	IPI00009315	61 kDa	0	0	0	0	3	0	1	0	0	0	0	0	0.00848224	0	0.00289084	0	0	0	0	0	0.000139053	0	4.73908e-05	0
1133	annexin IV	IPI00793199	36 kDa	0	0	0	1	0	0	3	0	0	0	0	0.0027398	0	0	0.00867253	0	0	0	0	7.61056e-05	0	0	0.000240903	0
1134	Isoform 1 of Zinc finger CCCH-type antiviral protein 1	IPI00410067	101 kDa	0	0	0	2	0	0	0	0	0	0	0	0.0054796	0	0	0	0	0	0	0	5.42535e-05	0	0	0	0
1135	Leucine-rich repeat-containing protein 47	IPI00170935	63 kDa	0	0	0	2	0	0	0	0	0	0	0	0.0054796	0	0	0	0	0	0	0	8.69778e-05	0	0	0	0
1136	Putative uncharacterized protein PTMA	IPI00917401	15 kDa	0	0	0	0	2	0	0	0	0	0	0	0	0.00565483	0	0	0	0	0	0	0	0.000376989	0	0	0
1137	Transcriptional activator protein Pur-alpha	IPI00023591	35 kDa	0	0	0	0	0	0	2	0	0	0	0	0	0	0	0.00578168	0	0	0	0	0	0	0	0.000165191	0
1138	Retinol binding protein 4, plasma	IPI00480192	23 kDa	0	0	0	0	3	0	0	0	0	0	0	0	0.00848224	0	0	0	0	0	0	0	0.000368793	0	0	0
1139	Isoform 2 of Serine/threonine-protein kinase PAK 1	IPI00289746	62 kDa	0	0	2	0	0	0	0	0	0	0	0.00544588	0	0	0	0	0	0	0	8.78368e-05	0	0	0	0	0
1140	Keratin, type II cytoskeletal 79	IPI00241841	58 kDa	0	0	0	0	84	0	0	0	0	0	0	0	0.237503	0	0	0	0	0	0	0	0.00409488	0	0	0
1141	Vigilin	IPI00022228	141 kDa	0	0	0	4	0	0	0	0	0	0	0	0.0109592	0	0	0	0	0	0	0	7.77249e-05	0	0	0	0
1142	Isoform B of Serine/threonine-protein kinase 24	IPI00002212	49 kDa	0	0	0	0	0	0	2	0	0	0	0	0	0	0	0.00578168	0	0	0	0	0	0	0	0.000117994	0
1143	Fibromodulin	IPI00000860	43 kDa	0	0	0	0	0	0	2	0	0	0	0	0	0	0	0.00578168	0	0	0	0	0	0	0	0.000134458	0
1144	cDNA FLJ60163, highly similar to Carbonic anhydrase 6	IPI00295105	36 kDa	0	2	0	0	0	0	0	0	0	0.00513571	0	0	0	0	0	0	0	0.000142659	0	0	0	0	0	0
1145	Isoform 1 of Catenin beta-1	IPI00017292	85 kDa	0	0	0	6	0	0	5	0	0	0	0	0.0164388	0	0	0.0144542	0	0	0	0	0.000193398	0	0	0.00017005	0
1146	Sialic acid synthase	IPI00147874	40 kDa	0	0	0	0	2	0	1	0	0	0	0	0	0.00565483	0	0.00289084	0	0	0	0	0	0.000141371	0	7.2271e-05	0
1147	Stomatin-like protein 2	IPI00334190	39 kDa	0	0	0	0	2	0	1	0	0	0	0	0	0.00565483	0	0.00289084	0	0	0	0	0	0.000144996	0	7.41241e-05	0
1148	Polypyrimidine tract-binding protein 1 isoform c variant (Fragment)	IPI00556157	36 kDa	1	0	0	0	0	0	0	2	0.00284107	0	0	0	0	0	0	0.00751202	7.89186e-05	0	0	0	0	0	0	0.000208667
1149	Isoform 4 of Interleukin-7 receptor subunit alpha	IPI00216518	30 kDa	0	0	0	0	0	1	0	2	0	0	0	0	0	0.00326168	0	0.00751202	0	0	0	0	0	0.000108723	0	0.000250401
1150	Isoform 2 of UPF0363 protein C7orf20	IPI00893923	31 kDa	0	0	0	0	0	0	0	2	0	0	0	0	0	0	0	0.00751202	0	0	0	0	0	0	0	0.000242323
1151	Exosome complex exonuclease RRP42	IPI00014198	32 kDa	0	0	0	0	2	0	0	0	0	0	0	0	0.00565483	0	0	0	0	0	0	0	0.000176713	0	0	0
1152	DNA-directed RNA polymerases I, II, and III subunit RPABC1	IPI00291093	25 kDa	0	0	0	0	0	0	2	0	0	0	0	0	0	0	0.00578168	0	0	0	0	0	0	0	0.000231267	0
1153	Programmed cell death protein 10	IPI00298558	25 kDa	0	0	0	0	2	0	0	0	0	0	0	0	0.00565483	0	0	0	0	0	0	0	0.000226193	0	0	0
1154	Ras-related protein Rab-11B	IPI00020436	24 kDa	0	0	0	0	0	0	2	0	0	0	0	0	0	0	0.00578168	0	0	0	0	0	0	0	0.000240903	0
1155	Isoform 1 of Multivesicular body subunit 12B	IPI00552643	36 kDa	0	0	0	0	0	0	2	0	0	0	0	0	0	0	0.00578168	0	0	0	0	0	0	0	0.000160602	0
1156	Crk-like protein	IPI00004839	34 kDa	0	0	0	0	0	0	0	2	0	0	0	0	0	0	0	0.00751202	0	0	0	0	0	0	0	0.000220942
1157	Guanine nucleotide-binding protein subunit alpha-13	IPI00290928	44 kDa	0	0	0	0	0	0	12	0	0	0	0	0	0	0	0.0346901	0	0	0	0	0	0	0	0.000788411	0
1158	Eukaryotic translation initiation factor 3 subunit G	IPI00290460	36 kDa	0	0	0	0	0	0	2	0	0	0	0	0	0	0	0.00578168	0	0	0	0	0	0	0	0.000160602	0
1159	Zinc finger protein-like 1	IPI00296374	34 kDa	2	0	0	0	0	0	0	0	0.00568214	0	0	0	0	0	0	0	0.000167122	0	0	0	0	0	0	0
1160	Cornulin	IPI00297056	54 kDa	0	2	0	0	0	0	0	0	0	0.00513571	0	0	0	0	0	0	0	9.51058e-05	0	0	0	0	0	0
1161	Fatty acid-binding protein, epidermal	IPI00007797	15 kDa	0	0	0	0	0	2	0	0	0	0	0	0	0	0.00652337	0	0	0	0	0	0	0	0.000434891	0	0
1162	Prefoldin subunit 2	IPI00006052	17 kDa	0	0	0	0	0	0	2	0	0	0	0	0	0	0	0.00578168	0	0	0	0	0	0	0	0.000340099	0
1163	Histone H2A type 1-A	IPI00045109	14 kDa	0	80	0	0	0	0	0	0	0	0.205428	0	0	0	0	0	0	0	0.0146735	0	0	0	0	0	0
1164	Isoform 1 of Guanine nucleotide-binding protein subunit beta-like protein 1	IPI00107339	36 kDa	0	0	0	0	0	0	0	3	0	0	0	0	0	0	0	0.011268	0	0	0	0	0	0	0	0.000313001
1165	Isoform 1 of Cullin-4B	IPI00179057	102 kDa	0	0	0	0	0	0	2	0	0	0	0	0	0	0	0.00578168	0	0	0	0	0	0	0	5.66832e-05	0
1166	Isoform 1 of Epsin-1	IPI00002495	58 kDa	0	0	0	0	2	0	0	0	0	0	0	0	0.00565483	0	0	0	0	0	0	0	9.74971e-05	0	0	0
1167	S-adenosylmethionine synthetase isoform type-2	IPI00010157	44 kDa	0	0	0	0	0	0	0	2	0	0	0	0	0	0	0	0.00751202	0	0	0	0	0	0	0	0.000170728
1168	Tripartite motif-containing protein 26	IPI00010948	62 kDa	0	0	0	0	2	0	0	0	0	0	0	0	0.00565483	0	0	0	0	0	0	0	9.12069e-05	0	0	0
1169	Isoform 1 of 3-hydroxyacyl-CoA dehydrogenase type-2	IPI00017726	27 kDa	0	0	0	0	0	0	0	2	0	0	0	0	0	0	0	0.00751202	0	0	0	0	0	0	0	0.000278223
1170	Translocon-associated protein subunit delta precursor	IPI00019385	20 kDa	0	2	0	0	0	0	0	0	0	0.00513571	0	0	0	0	0	0	0	0.000256786	0	0	0	0	0	0
1171	Probable ATP-dependent RNA helicase DDX28	IPI00020050	60 kDa	0	0	0	2	0	0	0	0	0	0	0	0.0054796	0	0	0	0	0	0	0	9.13267e-05	0	0	0	0
1172	Histone-lysine N-methyltransferase SETD7	IPI00028366	41 kDa	0	0	0	0	0	0	2	0	0	0	0	0	0	0	0.00578168	0	0	0	0	0	0	0	0.000141017	0
1173	Isoform 1 of Zinc finger protein 428	IPI00059764	20 kDa	0	0	0	0	0	0	2	0	0	0	0	0	0	0	0.00578168	0	0	0	0	0	0	0	0.000289084	0
1174	Isoform 1 of Mannose-1-phosphate guanyltransferase alpha	IPI00101782	46 kDa	0	0	0	0	0	0	2	0	0	0	0	0	0	0	0.00578168	0	0	0	0	0	0	0	0.000125689	0
1175	Plexin-B2	IPI00853369	205 kDa	0	0	0	0	0	0	2	0	0	0	0	0	0	0	0.00578168	0	0	0	0	0	0	0	2.82033e-05	0
1176	Cytochrome b-c1 complex subunit Rieske-like protein 1	IPI00889196	31 kDa	0	0	0	0	0	0	0	2	0	0	0	0	0	0	0	0.00751202	0	0	0	0	0	0	0	0.000242323
1177	keratin 3	IPI00942512	64 kDa	0	0	98	0	0	0	0	0	0	0	0.266848	0	0	0	0	0	0	0	0.0041695	0	0	0	0	0
